# Supplementary material for: A hydrogen atom transfer-enabled photocatalytic system for direct heteroarylation of C(sp3)–H and C(sp2)–H bonds
Source: Royal Society of Chemistry journal article supplement (doi:10.1039/d4gc06209d), 2025-01-01
Supplement: d4gc06209d1.pdf [file d4gc06209d1.pdf]

## Supporting Information

### Hydrogen Atom Transfer-Enabled Photocatalytic System for Direct Heteroarylation of C(sp<sup>3</sup>)-H and C(sp<sup>2</sup>)-H Bonds

Hao-Sen Wang,<sup>a</sup> Hao-Cong Li,<sup>a</sup> Xiao-Ya Yuan,<sup>a,b</sup> Kai Sun,<sup>a\*</sup> Xiao-Lan Chen,<sup>a\*</sup> Lingbo Qu,<sup>a,c</sup> Bing Yu<sup>a\*</sup>

<sup>a</sup>College of Chemistry, Zhengzhou University, Zhengzhou 450001, China.

<sup>b</sup>National Engineering Research Center of Low-Carbon Processing and Utilization of Forest Biomass, Nanjing Forestry University, Nanjing 210037, China

<sup>c</sup>Institute of Chemistry, Henan Academy of Sciences, Zhengzhou 450002

E-mails: sunkaichem@zzu.edu.cn; chenxl@zzu.edu.cn; bingyu@zzu.edu.cn

## Table of Contents

|                                                                                   |      |
|-----------------------------------------------------------------------------------|------|
| 1. General Information .....                                                      | S2   |
| 2. Photo-reaction instrument .....                                                | S2   |
| 3. Procedures for the synthesis of photoredox-catalysts.....                      | S3   |
| 3.1 Synthesis of Br-5CzBN .....                                                   | S3   |
| 3.2 Synthesis of Cl-5CzBN .....                                                   | S3   |
| 3.3 Synthesis of I-5CzBN.....                                                     | S4   |
| 3.4 Synthesis of <sup>t</sup> Bu-5CzBN.....                                       | S5   |
| 3.5 Synthesis of Ph-5CzBN .....                                                   | S5   |
| 4. Procedures for the synthesis of hydrogen atom transfer reagent precursors .... | S6   |
| 5. Experimental procedures .....                                                  | S10  |
| 5.1 Optimization of reaction conditions .....                                     | S10  |
| 5.2 General experimental procedures for the desired products.....                 | S13  |
| 5.3 The gram-scale synthesis .....                                                | S14  |
| 6. Mechanistic experiments.....                                                   | S15  |
| 6.1 Control experiments.....                                                      | S15  |
| 6.2 Fluorescence quenching study .....                                            | S16  |
| 6.3 Stern-Volmer emission quenching studies .....                                 | S17  |
| 6.4 Measurement of Redox Potential and Oxidant Potential .....                    | S18  |
| 6.5 Kinetic Isotope Effect experiments .....                                      | S21  |
| 7. Other information.....                                                         | S22  |
| 7.1 Substrate Propylene Glycol Site Selectivity.....                              | S22  |
| 7.2 Unsuccessful substrates .....                                                 | S23  |
| 8. Characterization data for photoredox-catalysts, HRP, and products .....        | S24  |
| 9. Reference .....                                                                | S114 |

## 1. General Information

All reagents were purchased from commercial suppliers and used without further purification unless otherwise stated. TLC was performed on silica gel plates (GF254, 200-300 mesh) using UV light (254/366 nm) for detection. Products were purified by column chromatography using silica gel (200-300 mesh) purchased from Qing Dao Hai Yang Chemical Industry Co. The  $^1\text{H}$  NMR,  $^{13}\text{C}$  NMR, and  $^{19}\text{F}$  NMR spectra were recorded on Bruker Avance 400 MHz or 600 MHz spectrometer at room temperature ( $20 \pm 3^\circ\text{C}$ ).  $^1\text{H}$ ,  $^{13}\text{C}$ , and  $^{19}\text{F}$  chemical shifts are quoted in parts per million (ppm) downfield from TMS. High-resolution mass spectra (HRMS) were acquired using an Agilent Infinity II Q-TOF G6545 equipped with electrospray ionization (ESI) technique. Fluorescence intensities were determined using an F-7100 FL spectrophotometer.

## 2. Photo-reaction instrument

Photochemical reaction was carried out under visible light irradiation by a blue LED at  $25^\circ\text{C}$ . RLH-18 8-position Photo Reaction System manufactured by Beijing Roger Tech Ltd was used in this system. Eight 10 W blue LED were equipped in this Photo reactor. The blue LED's energy peak wavelength is 460 nm, peak width at half-height is 18.4 nm. The reaction vessel is borosilicate glass test tube and the distance between it and the lamp is 15 mm, no filter is applied. More details are shown in Figure S1.

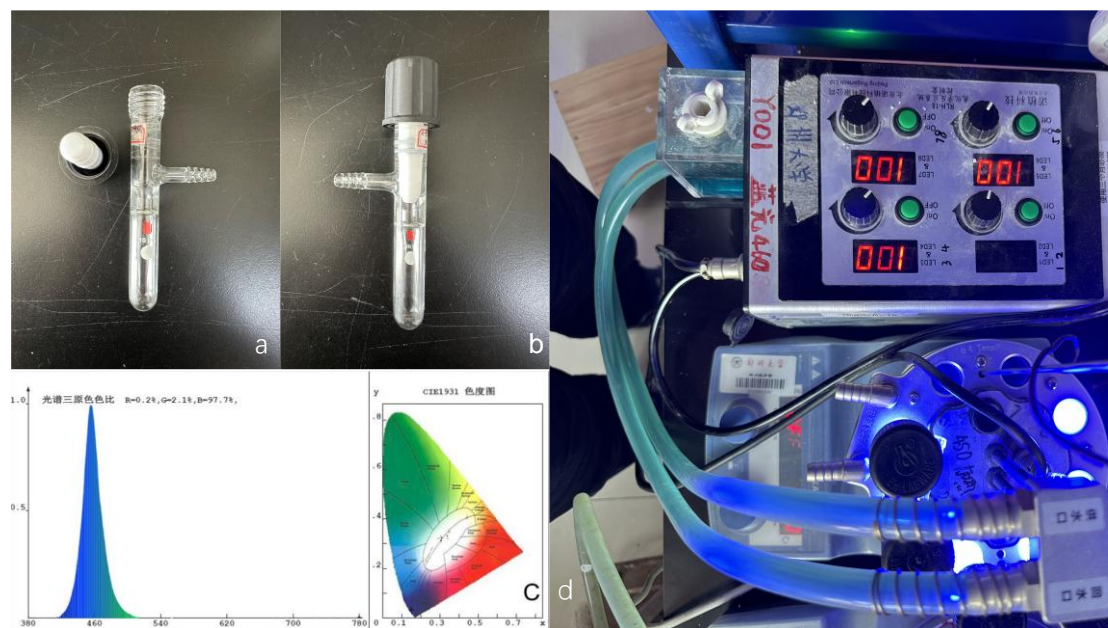

**Figure S1** The visible-light irradiation instrument. **A:** 10 mL reaction tube and cap. **B:** Reaction tube assembly. **C:** spectrum of blue LED lamp. **D:** Photoreactor.

### 3. Procedures for the synthesis of photoredox-catalysts

#### 3.1 Synthesis of Br-5CzBN

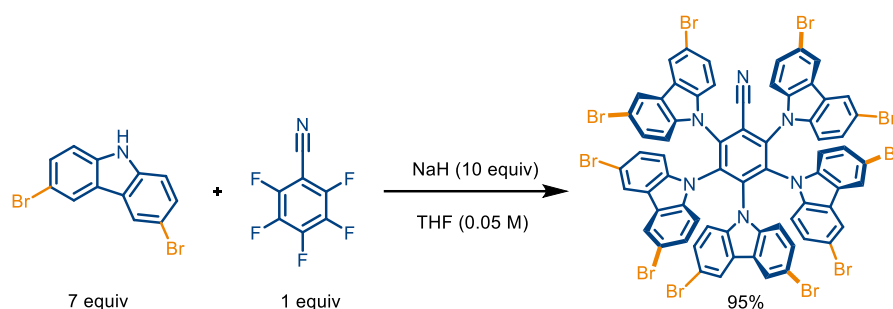

Under a nitrogen atmosphere at 0 °C, a solution of carbazole (12.5 mmol) in 40 mL of tetrahydrofuran was added dropwise to sodium hydride (NaH, 18.75 mmol). The reaction mixture was then stirred at 0 °C for 30 minutes. Subsequently, 2,3,4,5,6-pentafluorobenzonitrile (2 mmol) was introduced, and the reaction was allowed to proceed for 18 hours. Upon completion, the reaction was quenched by the addition of deionized water. The resulting mixture was subjected to vacuum filtration, and the solid residue was washed sequentially with deionized water, ethanol, and hexane. The product was then dried to yield a pure light-yellow solid, 95% yield. The final product was found to be insoluble in chloroform, ethanol, and dichloromethane, but slightly soluble in ethyl acetate (EA), dimethyl sulfoxide, and *N,N*-Dimethylformamide. The NMR sample was supplemented with EA to help dissolve.

**<sup>1</sup>H NMR** (600 MHz, DMSO-*d*<sub>6</sub>: EA = 1:5)  $\delta$  8.30 – 8.27 (m, 4H), 7.90 – 7.87 (m, 4H), 7.85 – 7.83 (m, 2H), 7.70 – 7.67 (m, 4H), 7.59 – 7.56 (m, 2H), 7.55 – 7.52 (m, 4H), 7.42 – 7.39 (m, 4H), 7.00 – 6.97 (m, 4H), 6.95 – 6.91 (m, 2H).

**HRMS** (ESI-TOF): *m/z*: [M + K]<sup>+</sup> Calcd for C<sub>67</sub>H<sub>30</sub>Br<sub>10</sub>N<sub>6</sub>K<sup>+</sup> 1756.3895; Found 1756.3894.

#### 3.2 Synthesis of Cl-5CzBN

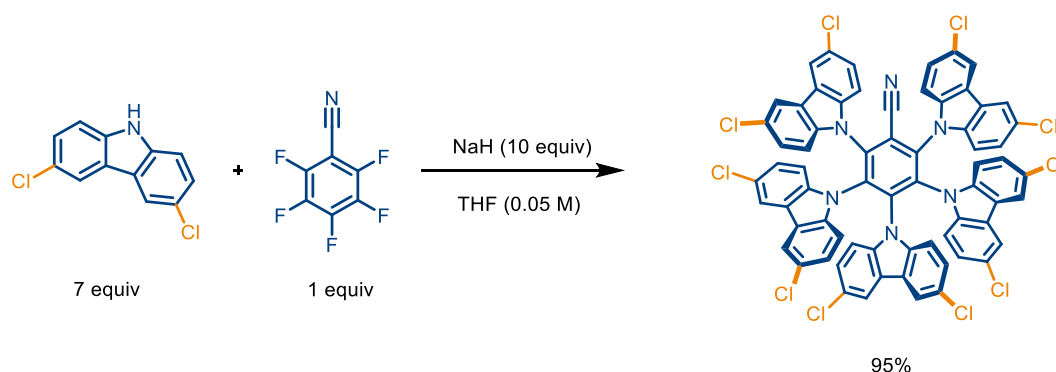

Under a nitrogen atmosphere at 0 °C, a solution of carbazole (12.5 mmol) in 40 mL of tetrahydrofuran was added dropwise to sodium hydride (NaH, 18.75 mmol). The reaction mixture was then stirred at 0 °C for 30 minutes. Subsequently, 2,3,4,5,6-pentafluorobenzonitrile (2 mmol) was introduced, and the reaction was allowed to proceed

for 10 hours. Upon completion, the reaction was quenched by the addition of deionized water. The resulting mixture was subjected to vacuum filtration, and the solid residue was washed sequentially with deionized water, ethanol, and hexane. The product was then dried to yield a pure light-yellow solid, 95% yield. The final product was found to be insoluble in chloroform, ethanol, and dichloromethane, but slightly soluble in ethyl acetate (EA), dimethyl sulfoxide, and N,N-Dimethylacetamide. The NMR sample was supplemented with N,N-Dimethylacetamide to help dissolve.

**<sup>1</sup>H NMR** (600 MHz, DMSO-*d*<sub>6</sub> : DMA = 1 : 5) δ 8.24 – 8.21 (m, 4H), 7.83 – 7.79 (m, 10H), 7.78 – 7.78 (m, 1H), 7.76 – 7.75 (m, 2H), 7.72 – 7.68 (m, 4H), 7.33 – 7.30 (m, 4H), 6.91 – 6.88 (m, 4H), 6.86 – 6.83 (m, 1H).

**HRMS** (ESI-TOF): : *m/z*: [M + K]<sup>+</sup> Calcd for C<sub>67</sub>H<sub>30</sub>Cl<sub>10</sub>N<sub>6</sub>K<sup>+</sup> 1310.8990; Found 1310.8982.

### 3.3 Synthesis of I-5CzBN

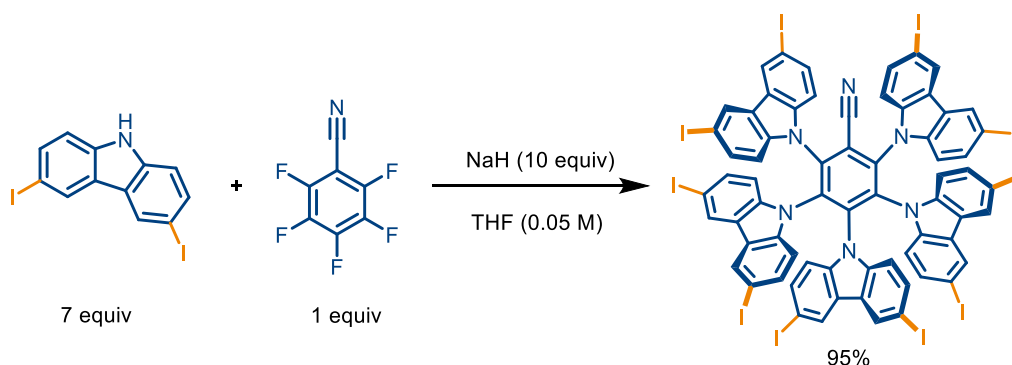



### 3.4 Synthesis of <sup>t</sup>Bu-5CzBN

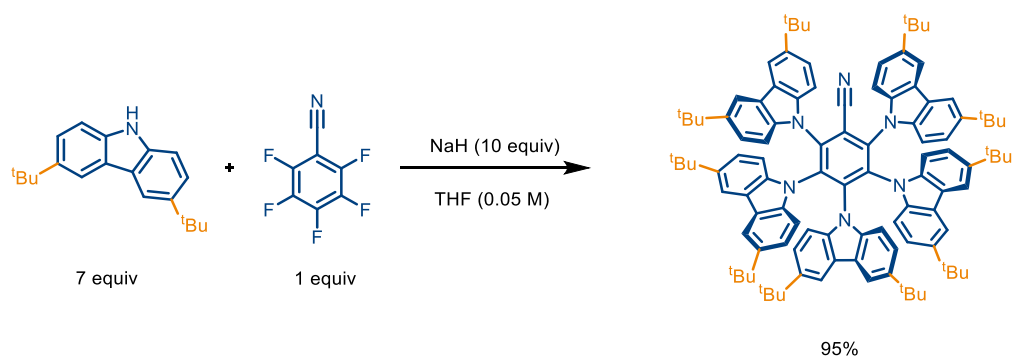

Under a nitrogen atmosphere at 0 °C, a solution of carbazole (12.5 mmol) in 40 mL of tetrahydrofuran was added dropwise to sodium hydride (NaH, 18.75 mmol). The reaction mixture was then stirred at 0 °C for 30 minutes. Subsequently, 2,3,4,5,6-pentafluorobenzonitrile (2 mmol) was introduced, and the reaction was allowed to proceed for 36 hours. Upon completion, the reaction was quenched by the addition of deionized water. Extract using ether and concentrate. Light yellow solid product was isolated by column chromatography using hexanes:ethyl acetate = 20:1 as the eluent, 95% yield.

**<sup>1</sup>H NMR** (400 MHz, Chloroform-*d*) δ 7.61 (d, *J* = 1.4 Hz, 4H), 7.22 (d, *J* = 1.8 Hz, 6H), 7.06 (d, *J* = 8.6 Hz, 2H), 6.98 (s, 8H), 6.69 (d, *J* = 8.6 Hz, 4H), 6.63 – 6.59 (m, 2H), 6.58 – 6.53 (m, 4H), 1.35 (s, 36H), 1.25 (s, 36H), 1.14 (s, 18H).

**<sup>13</sup>C NMR** (101 MHz, Chloroform-*d*) δ 143.6, 143.3, 142.9, 142.8, 140.2, 137.8, 137.4, 136.7, 136.0, 124.6, 124.4, 124.0, 122.7, 122.2, 121.7, 115.7, 115.0, 114.8, 110.6, 110.0, 109.8, 34.5, 34.2, 34.2, 31.8, 31.7, 31.6.

**HRMS** (ESI-TOF): *m/z*: [M + Na]<sup>+</sup> Calcd for C<sub>107</sub>H<sub>120</sub>N<sub>6</sub>Na<sup>+</sup> 1512.9500; Found 1512.9493.

### 3.5 Synthesis of Ph-5CzBN

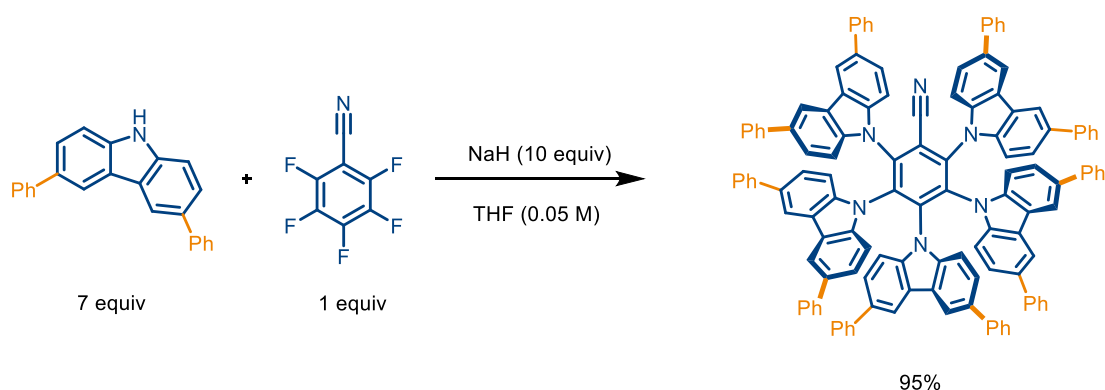

Under a nitrogen atmosphere at 0 °C, a solution of carbazole (12.5 mmol) in 40 mL of tetrahydrofuran was added dropwise to sodium hydride (NaH, 18.75 mmol). The reaction mixture was then stirred at 0 °C for 30 minutes. Subsequently, 2,3,4,5,6-pentafluorobenzonitrile (2 mmol) was introduced, and the reaction was allowed to proceed for 48 hours. Upon completion, the reaction was quenched by the addition of deionized

water. Extract using ether and concentrate. Light yellow solid product was isolated by column chromatography using hexanes : ethyl acetate = 10 : 1 as the eluent, 95% yield.

**<sup>1</sup>H NMR** (400 MHz, Chloroform-*d*) δ 7.98 (s, 4H), 7.83 – 7.72 (m, 2H), 7.65 – 7.43 (m, 20H), 7.43 – 7.15 (m, 50H), 7.06 – 6.91 (m, 6H).

**<sup>13</sup>C NMR** (101 MHz, Chloroform-*d*) δ 143.2, 141.5, 141.4, 141.3, 141.1, 139.5, 138.8, 138.7, 137.9, 135.3, 134.9, 134.7, 128.9, 128.8, 128.7, 128.6, 127.6, 127.4, 127.3, 127.2, 127.1, 126.9, 126.7, 125.3, 125.2, 125.1, 124.4, 124.2, 119.0, 118.4, 118.3, 111.4, 111.3, 111.2.

**HRMS** (ESI-TOF): *m/z*: [M + Na]<sup>+</sup> Calcd for C<sub>127</sub>H<sub>80</sub>N<sub>6</sub>Na<sup>+</sup> 1728.6110; Found 1728.6118.

#### 4. Procedures for the synthesis of hydrogen atom transfer reagent precursors

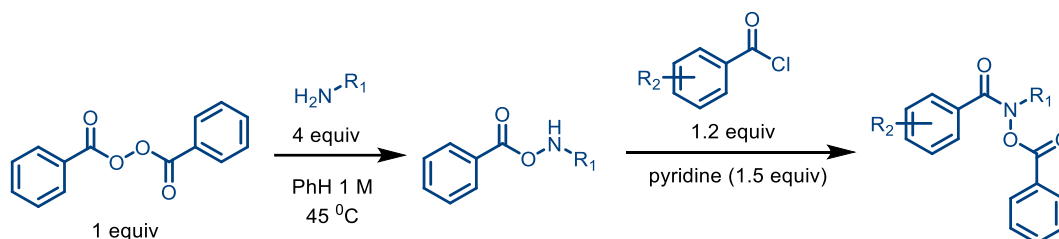

To a flame-dried round bottom flask with a stir bar was added benzoyl peroxide (10 mmol), which was then dissolved in benzene (15 mL). The reaction was sealed and placed under N<sub>2</sub>. Roughly 60% of the total volume of amine was added and the reaction was heated to 45 °C for 2 hours, and changed color from cloudy white to cloudy Carolina blue. After 2 hours, the remaining amount of amine (to the total of 40 mmol) was added, and the reaction was let to stir over 12 hours. After 12 hours, the reaction was cold down to 0 °C, and pyridine (20 mmol) was added. Acyl chloride (12 mmol) was added dropwise over 10 minutes, and the mixture was allowed to warm to room temperature for 12 hours. After the reaction, the solution was washed with 1M hydrochloric acid, water, brine and dried over Na<sub>2</sub>SO<sub>4</sub>, concentrated, with no need for further purification, than 99% yield.

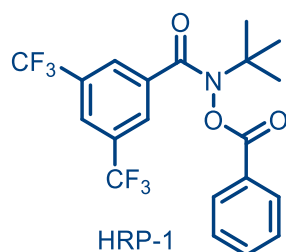

Colorless oil, yield ≥ 99%.

**<sup>1</sup>H NMR** (600 MHz, Chloroform-*d*) δ 8.04 (s, 2H), 7.84 – 7.81 (m, 2H), 7.76 (s, 1H), 7.61 – 7.57 (m, 1H), 7.42 – 7.39 (m, 2H), 1.63 (s, 9H).

**<sup>13</sup>C NMR** (151 MHz, Chloroform-*d*) δ 167.6, 165.2, 137.8, 134.6, 131.3 (q, *J* = 33.8 Hz),

129.6, 128.8, 127.9 (q,  $J = 3.8$  Hz), 125.8, 123.6 (q,  $J = 3.8$  Hz), 122.8 (q,  $J = 273.0$  Hz), 63.8, 27.5

**$^{19}\text{F}$  NMR** (565 MHz, Chloroform- $d$ )  $\delta$  -63.13.

**HRMS** (ESI-TOF):  $m/z$ :  $[\text{M} + \text{H}]^+$  Calcd for  $\text{C}_{20}\text{H}_{18}\text{F}_6\text{NO}_3^+$  434.1188; Found 434.1185. $m/z$ .

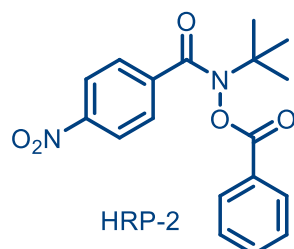

Colorless oil, yield  $\geq 99\%$ .

**$^1\text{H}$  NMR** (600 MHz, Chloroform- $d$ )  $\delta$  8.03 – 7.99 (m, 2H), 7.74 – 7.70 (m, 2H), 7.64 – 7.59 (m, 2H), 7.51 – 7.45 (m, 1H), 7.33 – 7.28 (m, 2H), 1.52 (s, 11H).

**$^{13}\text{C}$  NMR** (151 MHz, Chloroform- $d$ )  $\delta$  169.0, 165.3, 148.3, 142.1, 134.6, 129.6, 128.9, 128.2, 123.1, 63.6, 27.5.

**HRMS** (ESI-TOF):  $m/z$ :  $[\text{M} + \text{H}]^+$  Calcd for  $\text{C}_{18}\text{H}_{19}\text{N}_2\text{O}_5^+$  343.1288; Found 343.1286.

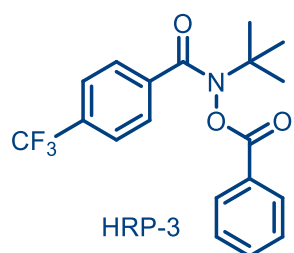

Colorless oil, yield  $\geq 99\%$ .

**$^1\text{H}$  NMR** (600 MHz, Chloroform- $d$ )  $\delta$  7.80 – 7.77 (m, 2H), 7.67 – 7.63 (m, 2H), 7.59 – 7.55 (m, 1H), 7.53 – 7.50 (m, 2H), 7.41 – 7.37 (m, 2H), 1.61 (s, 9H).

**$^{13}\text{C}$  NMR** (151 MHz, Chloroform- $d$ )  $\delta$  169.9, 165.4, 139.6, 134.3, 131.7 (q,  $J = 32.7$  Hz), 129.6, 128.7, 127.5, 126.3, 124.9 (q,  $J = 3.8$  Hz), 122.7 (q,  $J = 271.8$  Hz), 63.4, 27.6.

**$^{19}\text{F}$  NMR** (565 MHz, Chloroform- $d$ )  $\delta$  -63.01.

**HRMS** (ESI-TOF):  $m/z$ :  $[\text{M} + \text{H}]^+$  Calcd for  $\text{C}_{19}\text{H}_{19}\text{F}_3\text{NO}_3^+$  366.1311; Found 366.1312  $m/z$ :  
 $[\text{M} + \text{K}]^+$  Calcd for  $\text{C}_{19}\text{H}_{18}\text{F}_3\text{NO}_3\text{K}^+$  404.0870; Found 404.0873.

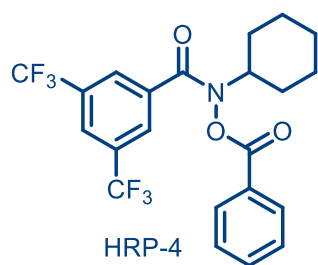

Colorless oil, yield  $\geq 99\%$ .

**$^1\text{H}$  NMR** (600 MHz, Chloroform-*d*)  $\delta$  7.72 – 7.66 (m, 3H), 7.33 – 7.31 (m, 2H), 7.29 – 7.26 (m, 1H), 7.20 – 7.15 (m, 2H), 4.67 – 4.60 (m, 1H), 2.27 – 2.17 (m, 2H), 1.98 – 1.88 (m, 4H), 1.76 – 1.68 (m, 1H), 1.50 – 1.40 (m, 2H), 1.33 – 1.24 (m, 2H).

**$^{13}\text{C}$  NMR** (151 MHz, Chloroform-*d*)  $\delta$  174.0, 170.9, 140.1, 137.6, 132.5, 131.7 (q,  $J = 34.1$  Hz), 128.7, 128.6, 128.2 (d,  $J = 3.9$  Hz), 124.2 (q), 122.5 (q,  $J = 272.9$  Hz), 59.0, 30.5, 26.3, 25.2.

**$^{19}\text{F}$  NMR** (565 MHz, Chloroform-*d*)  $\delta$  -63.36.

**HRMS** (ESI-TOF):  $m/z$ :  $[\text{M} + \text{Na}]^+$  Calcd for  $\text{C}_{22}\text{H}_{20}\text{F}_6\text{NO}_3\text{Na}^+$  482.1161; Found 482.1157.

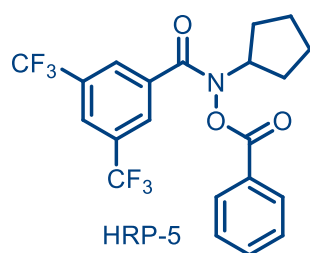

Colorless oil, yield  $\geq 99\%$ .

**$^1\text{H}$  NMR** (600 MHz, Chloroform-*d*)  $\delta$  7.75 – 7.68 (m, 3H), 7.39 – 7.35 (m, 2H), 7.33 – 7.29 (m, 1H), 7.23 – 7.18 (m, 2H), 5.08 – 4.99 (m, 1H), 2.21 – 2.13 (m, 2H), 2.12 – 2.04 (m, 2H), 2.02 – 1.94 (m, 2H), 1.70 – 1.62 (m, 2H).

**$^{13}\text{C}$  NMR** (151 MHz, Chloroform-*d*)  $\delta$  174.0, 170.9, 140.1, 137.6, 132.5, 131.7 (q,  $J = 34.1$  Hz), 128.7, 128.6, 128.2 (q,  $J = 3.9$  Hz), 124.3 (q,  $J = 3.7$  Hz), 122.5 (q,  $J = 272.9$  Hz), 59.0, 30.5, 26.3, 25.2.

**$^{19}\text{F}$  NMR** (565 MHz, Chloroform-*d*)  $\delta$  -63.36.

**HRMS** (ESI-TOF):  $m/z$ :  $[\text{M} + \text{K}]^+$  Calcd for  $\text{C}_{21}\text{H}_{17}\text{F}_6\text{NO}_3\text{K}^+$  484.0744; Found 484.0742.

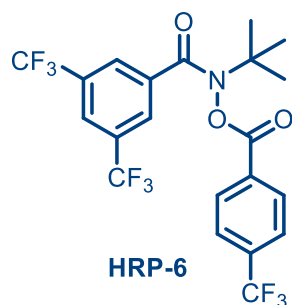

Colorless oil, yield  $\geq 99\%$ .

**<sup>1</sup>H NMR**(600 MHz, Chloroform-*d*) δ 8.04 – 8.01 (m, 2H), 7.97 – 7.93 (m, 2H), 7.79 (s, 1H), 7.70 – 7.66 (m, 2H), 1.63 (s, 9H).

**<sup>13</sup>C NMR** (151 MHz, Chloroform-*d*) δ 167.7, 164.1, 137.5, 136.1 (q, *J* = 33.1 Hz), 131.5 (q, *J* = 33.8 Hz), 130.0, 129.1, 127.7 (q, *J* = 3.8 Hz), 125.9 (q, *J* = 3.8 Hz), 123.8 (p, *J* = 3.8 Hz), 123.1 (q, *J* = 272.9 Hz), 122.7 (q, *J* = 273.0 Hz), 64.1, 27.5.

**<sup>19</sup>F NMR** (565 MHz, Chloroform-*d*) δ -63.21 (d, *J* = 9.0 Hz), -63.64 (d, *J* = 9.8 Hz).

**HRMS** (ESI-TOF): *m/z*: [M + NH<sub>4</sub>]<sup>+</sup> Calcd for C<sub>21</sub>H<sub>20</sub>F<sub>9</sub>N<sub>2</sub>O<sub>3</sub><sup>+</sup> 519.1325; Found 519.1327; *m/z*: [M + K]<sup>+</sup> Calcd for C<sub>21</sub>H<sub>16</sub>F<sub>9</sub>NO<sub>3</sub>K<sup>+</sup> 540.0618; Found 540.0637

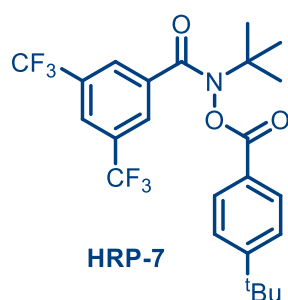

Colorless oil, yield ≥ 99%.

**<sup>1</sup>H NMR** (600 MHz, Chloroform-*d*) δ 8.08 (s, 2H), 7.84 – 7.76 (m, 3H), 7.50 – 7.41 (m, 2H), 1.65 (s, 9H), 1.32 (s, 9H).

**<sup>13</sup>C NMR** (151 MHz, Chloroform-*d*) δ 167.7, 165.2, 158.7, 137.9 (q, *J* = 2.8 Hz), 131.3 (q, *J* = 33.9 Hz), 129.6, 128.0 (q, *J* = 3.6 Hz), 125.8, 123.6 (q, *J* = 3.7 Hz), 122.93, 122.87 (q, *J* = 272.8 Hz), 63.7, 35.2, 30.9, 27.5.

**<sup>19</sup>F NMR** (565 MHz, Chloroform-*d*) δ -63.11.

**HRMS** (ESI-TOF): *m/z*: [M + H]<sup>+</sup> Calcd for C<sub>24</sub>H<sub>26</sub>F<sub>6</sub>NO<sub>3</sub><sup>+</sup> 490.1811; Found 490.1817.

## 5. Experimental procedures

### 5.1 Optimization of reaction conditions

**Table S1 Optimization of photocatalysts<sup>a</sup>**

| Entry | Photocatalyst         | Yield of <b>3</b> (%) |
|-------|-----------------------|-----------------------|
| 1     | 5CzBN                 | 31                    |
| 2     | Br-5CzBN              | 85                    |
| 3     | I-5CzBN               | 36                    |
| 4     | Ph-5CzBN              | Trace                 |
| 5     | Cl-5CzBN              | 12                    |
| 6     | <sup>t</sup> Bu-5CzBN | 10                    |
| 7     | Ir(ppy) <sub>3</sub>  | N.D.                  |
| 8     | 4CzIPN                | 35                    |
| 9     | 3CzFIPN               | 14                    |
| 10    | Eosin Y               | N.D.                  |
| 11    | Methylene blue        | 16                    |

<sup>a</sup>Reaction conditions: **1** (1 mmol), **2** (0.1 mmol), **HRP-1** (0.1 mmol), Photocatalyst (5 mol%), DMSO (1 mL), H<sub>2</sub>O (5 μL), 10 W 460 nm blue LEDs, 40 °C. Isolated yields were given.



**Table S2 Optimization of solvent<sup>a</sup>**

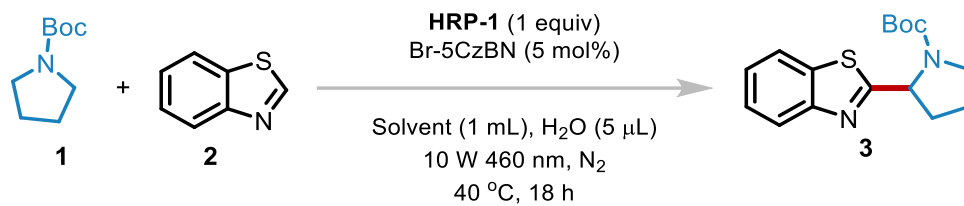

| Entry | Solvent           | Yield of <b>3</b> (%) |
|-------|-------------------|-----------------------|
| 1     | DMSO              | 85                    |
| 2     | DMF               | 23                    |
| 3     | DCM               | 6                     |
| 4     | DCE               | 37                    |
| 5     | EA                | 4                     |
| 6     | MeCN              | 8                     |
| 7     | DMAc              | 12                    |
| 8     | PhCl              | 28                    |
| 9     | DMC               | 6                     |
| 10    | DEC               | 30                    |
| 11    | PhCF <sub>3</sub> | 45                    |

<sup>a</sup>Reaction conditions: **1** (1 mmol), **2** (0.1 mmol), **HRP-1** (0.1 mmol), **Br-5CzBN** (5 mol%), Solvent (1 mL), H<sub>2</sub>O (5 μL), 10 W 460 nm blue LEDs, 40 °C. Isolated yields were given.

**Table S3 Optimization of Reaction Conditions<sup>a</sup>**

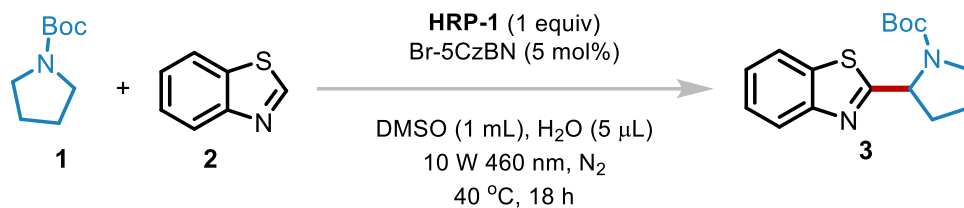

| Entry | Reaction Conditions           | Yield of <b>3</b> (%) |
|-------|-------------------------------|-----------------------|
| 1     | <b>1:2</b> =10:1              | 84                    |
| 2     | <b>1:2</b> =7.5:1             | 43                    |
| 3     | <b>1:2</b> =5:1               | 35                    |
| 4     | <b>1:2</b> =2.5:1             | 10                    |
| 5     | <b>1:2</b> =1:1               | Trace                 |
| 6     | 12 h                          | 56                    |
| 7     | 24 h                          | 83                    |
| 8     | 5 W                           | 32                    |
| 9     | 20 W                          | 11                    |
| 10    | H <sub>2</sub> O (10 $\mu$ L) | 61                    |
| 11    | 25 °C                         | 70                    |
| 12    | 60 °C                         | 79                    |
| 13    | No HAT Reagent                | N.R.                  |
| 14    | No Br-5CzBN                   | N.R.                  |
| 15    | Dark                          | N.R.                  |

<sup>a</sup>Reaction conditions: **1** (1 mmol), **2** (0.1 mmol), **HRP-1** (0.1 mmol), Br-5CzBN (5 mol%). DMSO (1 mL), H<sub>2</sub>O (5  $\mu$ L), 10 W 460 nm blue LEDs, 40 °C. Isolated yields were given.

**Table S4 Optimization of HRP<sup>a</sup>**

$\text{1} + \text{2} \xrightarrow[\text{DMSO (1 mL), H}_2\text{O (5 } \mu\text{L), 10 W 460 nm, N}_2, 40\text{ }^\circ\text{C, 18 h}]{\text{HRP (1 equiv), Br-5CzBN (5 mol\%)}} \text{3}$

| Entry | HAT reagents precursors | Yield of <b>3</b> (%) |
|-------|-------------------------|-----------------------|
| 1     | <b>HRP-1</b>            | 83                    |
| 2     | <b>HRP-2</b>            | 36                    |
| 3     | <b>HRP-3</b>            | 60                    |
| 4     | <b>HRP-4</b>            | 38                    |
| 5     | <b>HRP-5</b>            | 17                    |
| 6     | <b>HRP-6</b>            | 31                    |
| 7     | <b>HRP-7</b>            | 55                    |

<sup>a</sup>Reaction conditions: **1** (1 mmol), **2** (0.1 mmol), **HRP** (0.1 mmol), Br-5CzBN (5 mol%), DMSO (1 mL), H<sub>2</sub>O (5 μL), 10 W 460 nm blue LEDs, 40 °C. Isolated yields were given.

## 5.2 General experimental procedures for the desired products

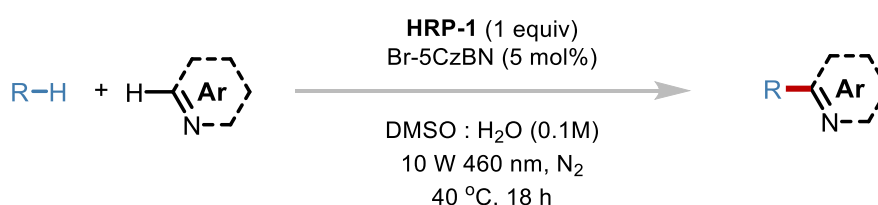

**Procedure A:** In a 10 mL Schlenk tube, alkane (amine or ether) (10.0 equiv, 2.0 mmol), heteroarene (1.0 equiv, 0.2 mmol), **HRP-1** (1.0 equiv, 0.2 mmol), Br-5CzBN (5.0 mol%) were dissolved in DMSO (2.0 mL) and H<sub>2</sub>O (10.0 μL), and then charging with nitrogen more than three times. The tube was stirred for 18 h with the irradiation of 10 W blue LED ( $\lambda = 460$  nm), at 40 °C. After the reaction, the mixture was extracted with saturated sodium bicarbonate solution and ethyl acetate, and the organic layer was washed with saturated brine and dried over anhydrous Na<sub>2</sub>SO<sub>4</sub>. After filtration, the solvent was evaporated in vacuo, and the residue was purified by column chromatography on silica gel to afford the desired products.

**Procedure B:** In a 10 mL Schlenk tube, alcohol (10.0 equiv, 2.0 mmol), heteroarene (1.0 equiv, 0.2 mmol), **HRP-1** (1.0 equiv, 0.2 mmol), Br-5CzBN (5.0 mol%) were dissolved in DMSO (2.0 mL) and H<sub>2</sub>O (10.0 μL), and then charging with nitrogen more than three times.

The tube was stirred for 18 h with the irradiation of 10 W blue LED ( $\lambda = 460$  nm), at 40 °C. After the reaction, the mixture was extracted with saturated sodium bicarbonate solution and ethyl acetate, and the organic layer was washed with saturated brine and dried over anhydrous  $\text{Na}_2\text{SO}_4$ . After filtration, the solvent was evaporated in vacuo, and the residue was purified by column chromatography on silica gel to afford the desired products.

**Procedure C:** In a 10 mL Schlenk tube, arylalkane (5.0 equiv, 1.0 mmol), heteroarene (1.0 equiv, 0.2 mmol), **HRP-1** (1.0 equiv, 0.2 mmol), Br-5CzBN (5.0 mol%) were dissolved in DMSO (2.0 mL) and  $\text{H}_2\text{O}$  (10.0  $\mu\text{L}$ ), and then charging with nitrogen more than three times. The tube was stirred for 18 h with the irradiation of 10 W blue LED ( $\lambda = 460$  nm), at 40 °C. After the reaction, the mixture was extracted with saturated sodium bicarbonate solution and ethyl acetate, and the organic layer was washed with saturated brine and dried over anhydrous  $\text{Na}_2\text{SO}_4$ . After filtration, the solvent was evaporated in vacuo, and the residue was purified by column chromatography on silica gel to afford the desired products.

**Procedure D:** In a 10 mL Schlenk tube, aldehyde (3.0 equiv, 0.6 mmol), heteroarene (1.0 equiv, 0.2 mmol), **HRP-1** (1.0 equiv, 0.2 mmol), Br-5CzBN (5.0 mol%) were dissolved in DMSO (2.0 mL) and  $\text{H}_2\text{O}$  (10.0  $\mu\text{L}$ ), and then charging with nitrogen more than three times. The tube was stirred for 18 h with the irradiation of 10 W blue LED ( $\lambda = 460$  nm), at 40 °C. After the reaction, the mixture was extracted with saturated sodium bicarbonate solution and ethyl acetate, and the organic layer was washed with saturated brine and dried over anhydrous  $\text{Na}_2\text{SO}_4$ . After filtration, the solvent was evaporated in vacuo, and the residue was purified by column chromatography on silica gel to afford the desired products.

### 5.3 The gram-scale synthesis

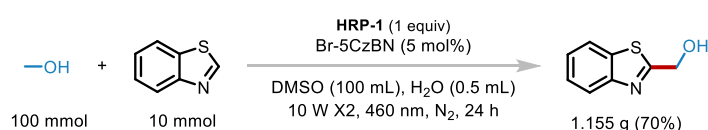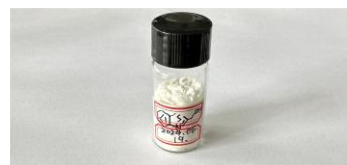

In a 100 mL three-neck flask, methanol (100.0 mmol, 10.0 equiv), heteroarene (10.0 mmol, 1.0 equiv), **HRP-1** (10.0 mmol, 1.0 equiv) and Br-5CzBN (5.0 mol%) were dissolved in DMSO (100.0 mL) and  $\text{H}_2\text{O}$  (0.5 mL), and then the tube was stirred for 24 h with the irradiation of blue LED ( $\lambda = 456$  nm), at 40 °C. After the reaction, the mixture was extracted with saturated sodium bicarbonate solution and ethyl acetate, and the organic layer was washed with saturated brine and dried over anhydrous  $\text{Na}_2\text{SO}_4$ . After filtration, the solvent was evaporated in vacuo, and the residue was purified by column chromatography on silica gel to afford the desired product in 70% yield (1.155 g).

## 6. Mechanistic experiments

### 6.1 Control experiments

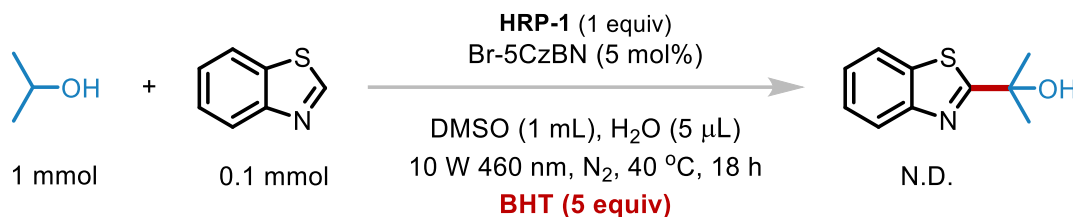

In a 10 mL Schlenk tube, isopropanol (10.0 equiv, 0.1 mmol), benzothiazole (1.0 equiv, 0.1 mmol), **HRP-1** (1.0 equiv, 0.1 mmol), Br-5CzBN (5.0 mol%) were dissolved in DMSO (1.0 mL) and H<sub>2</sub>O (5.0 μl), Afterward, (2,6-di-tert-butyl-4- methyl-phenol) (BHT, 5.0 equiv) was added in the mixture, and then charging with nitrogen more than three times. The tube was stirred for 18 h with the irradiation of 10 W blue LED ( $\lambda = 460$  nm). After the reaction, the yield of product was detected by TLC.

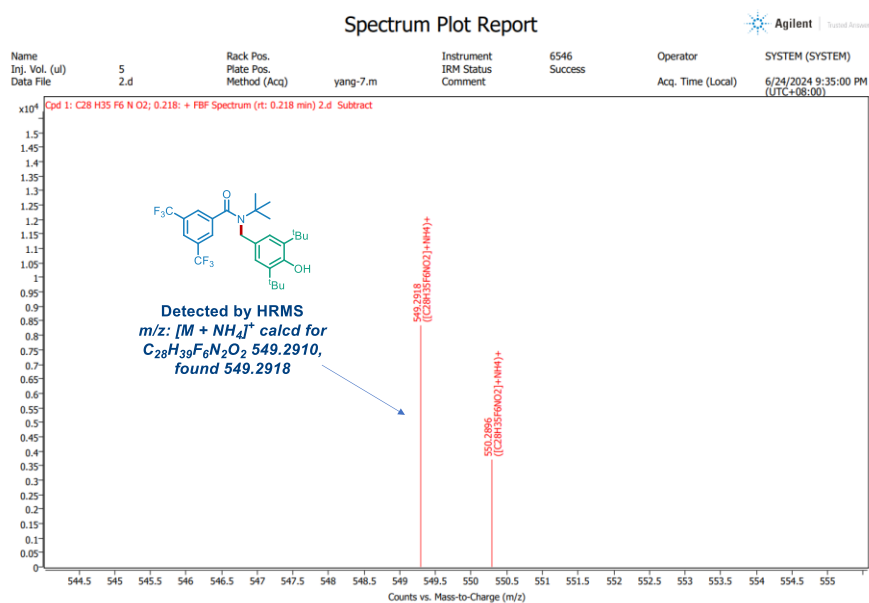

**Figure S2** The HRMS analysis of reaction in the presence of BHT

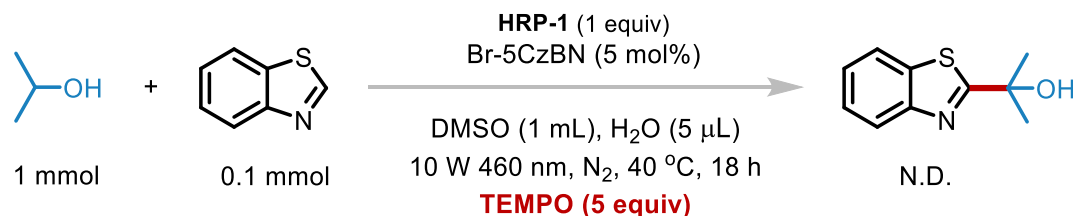

In a 10 mL Schlenk tube, isopropanol (10.0 equiv, 0.1 mmol), benzothiazole (1.0 equiv, 0.1 mmol), **HRP-1** (1.0 equiv, 0.1 mmol), Br-5CzBN (5.0 mol%) were dissolved in DMSO (1.0 mL) and H<sub>2</sub>O (5.0 μl), Afterward, (2,6-di-tert-butyl-4- methyl-phenol) (TEMPO, 5.0 equiv) was added in the mixture, and then charging with nitrogen more than three times. The tube

was stirred for 18 h with the irradiation of 10 W blue LED ( $\lambda = 460$  nm), at 40 °C. After the reaction, the yield of product was detected by TLC.

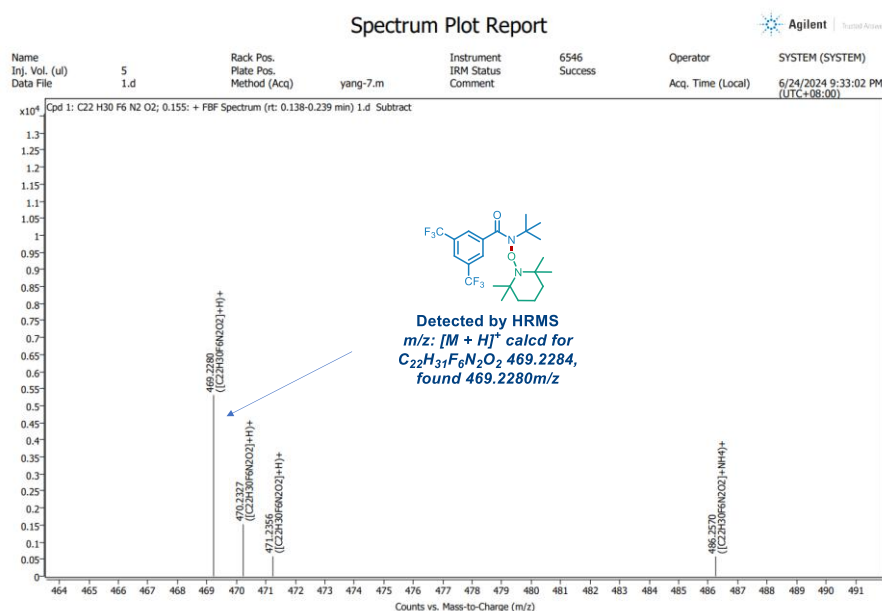

**Figure S3** The HRMS analysis of reaction in the presence of TEMPO

## 6.2 Fluorescence quenching study

Fluorescence quenching experiments were run with a freshly prepared solution of Br-5CzBN series ( $5 \times 10^{-5}$  M) in degassed anhydrous DMSO added the appropriate amount of a quencher (0.2 M) in a screw-top quartz cuvette at room temperature. After degassing the sample with a stream of  $N_2$  for 10 minutes, the fluorescence emission was measured from 450 nm to 800 nm, at room temperature.

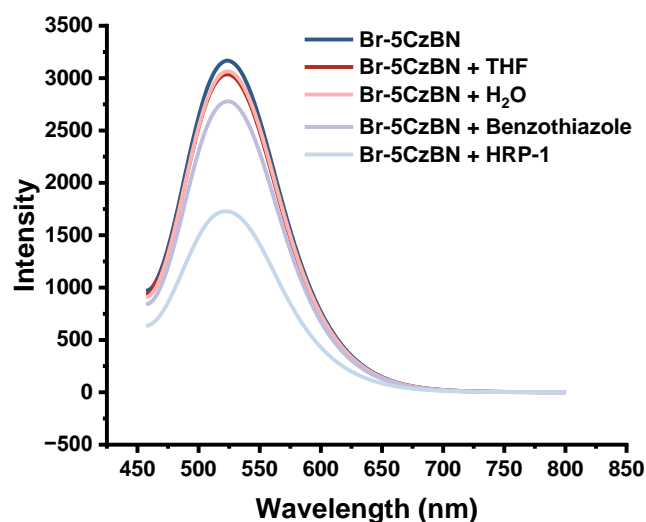

**Figure S4** Substrates fluorescence quenching experiments.



## Results and Discussion

It can be observed that among the various species in the reaction system, **HRP-1** exhibits the best quenching effect on Br-5CzBN\*, while the other species are unable to quench Br-5CzBN\*. This suggests that there is an interaction between **HRP-1** and Br-5CzBN\* during the reaction process. We propose that this interaction may involve a single-electron transfer mechanism; however, further investigation is necessary to determine the extent of the interaction between HRP-1 and Br-5CzBN\*.

### 6.3 Stern-Volmer emission quenching studies

Stern-Volmer fluorescence quenching experiments were run with freshly prepared solution of 5CzBN ( $5 \times 10^{-5}$  M) in degassed anhydrous DMSO added the appropriate amount of a quencher (0.2 M) in a screw-top quartz cuvette at room temperature. After degassing the sample with a stream of N<sub>2</sub> for 10 min, the fluorescence emission was measured from 450 nm to 800 nm, at room temperature.

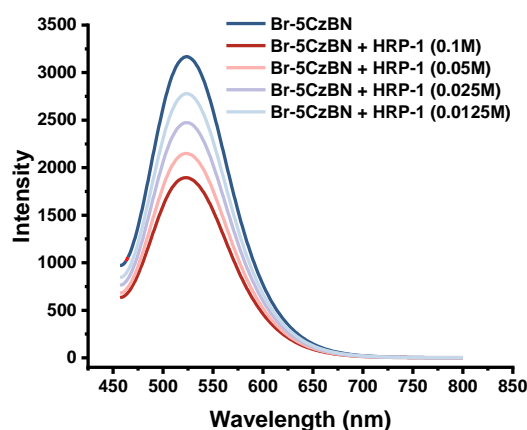

Figure S5 Concentration gradient quenching experiments.

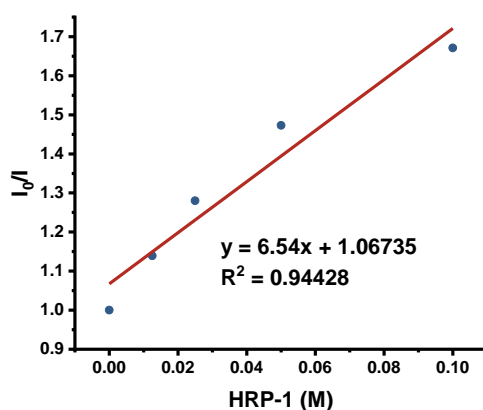

Figure S6 Stern-Volmer fluorescence quenching experiments ( $R_2 = 0.94428$ ).

## Results and Discussion

By adjusting the concentration of **HRP-1**, it is evident that the quenching intensity of Br-5CzBN\* shows a positive correlation with the gradient changes in **HRP-1** concentration. This clearly indicates that the quenching effect of **HRP-1** on Br-5CzBN\* results from a direct interaction. However, it still requires further experimental investigation to determine whether the quenching of sensitized Br-5CzBN\* by **HRP-1** is achieved through a single electron transfer process. A comparison of the redox potentials of two species is needed for further clarification.

## 6.4 Measurement of Redox Potential and Oxidant Potential

Cyclic voltammetry experiments were performed in a 20 mL three-electrode cell under nitrogen atmosphere at room temperature. A steady glassy carbon disk electrode was used as the working electrode, while a platinum wire was used as the counter electrode. The reference was an SCE electrode. Tetrabutylammonium hexafluorophosphate (TBAPF<sub>6</sub>) (0.1 M) was employed as the electrolyte, and DMF was employed as the solvent. The mixture was poured into the electrochemical cell in cyclic voltammetry experiments, and the scan rate was 0.10 V/s.

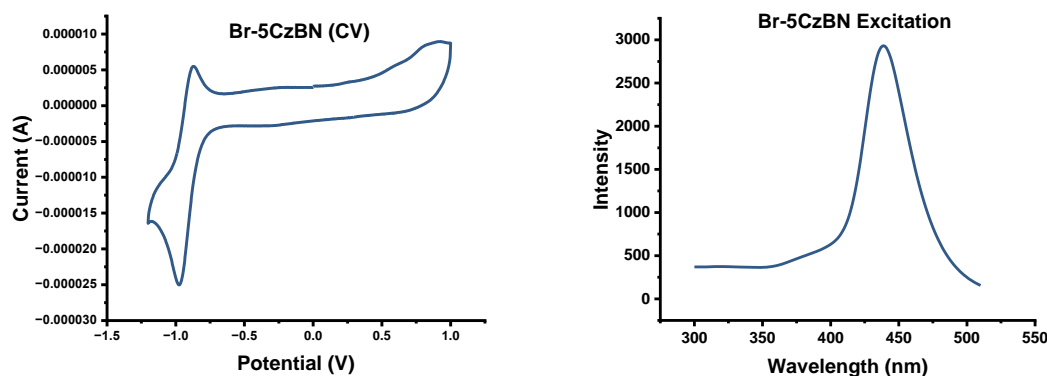

**Figure S7** Cyclic voltammogram of Br-5CzBN (1 M) in DMF.  $E(\text{PC}^{+}/\text{PC}) = +0.94 \text{ V vs SCE}$  and optimal excitation wavelength.

The zero-zero vibrational state excitation energy  $E_{0,0}$  of Br-5CzBN was estimated by the corresponding energy of the wavelength at optimal excitation wavelength (**438 nm**). Excited state oxidation and reduction potentials were calculated by the following approximating formulas<sup>1</sup>:

$$E(\text{PC}^{+}/\text{PC}^{*}) = E(\text{PC}^{+}/\text{PC}) - E_{0,0}$$

The excited state oxidation potentials for Br-5CzBN were thus calculated:

$$E(\text{PC}^{+}/\text{PC}^{*}) = E(\text{PC}^{+}/\text{PC}) - E_{0,0} = 0.94 \text{ V} - 2.83 \text{ V}$$

$$E(\text{PC}^{+}/\text{PC}^{*}) = -1.89 \text{ V vs SCE}$$

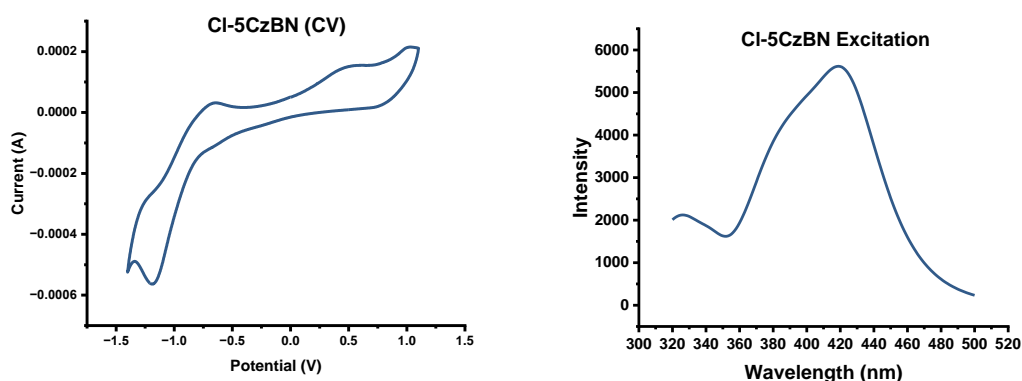

**Figure S8** Cyclic voltammogram of Cl-5CzBN (1 M) in DMF.  $E(\text{PC}^{+}/\text{PC}) = +1.02 \text{ V vs SCE}$  and optimal excitation wavelength.

The zero-zero vibrational state excitation energy  $E_{0,0}$  of Cl-5CzBN was estimated by the corresponding energy of the wavelength at optimal excitation wavelength (**418 nm**). Excited state oxidation and reduction potentials were calculated by the following approximating formulas:

$$E(\text{PC}^{+}/\text{PC}^*) = E(\text{PC}^{+}/\text{PC}) - E_{0,0}$$

The excited state oxidation potentials for Br-5CzBN were thus calculated:

$$E(\text{PC}^{+}/\text{PC}^*) = E(\text{PC}^{+}/\text{PC}) - E_{0,0} = 1.02 \text{ V} - 2.96 \text{ V}$$

$$E(\text{PC}^{+}/\text{PC}^*) = -1.94 \text{ V vs SCE}$$

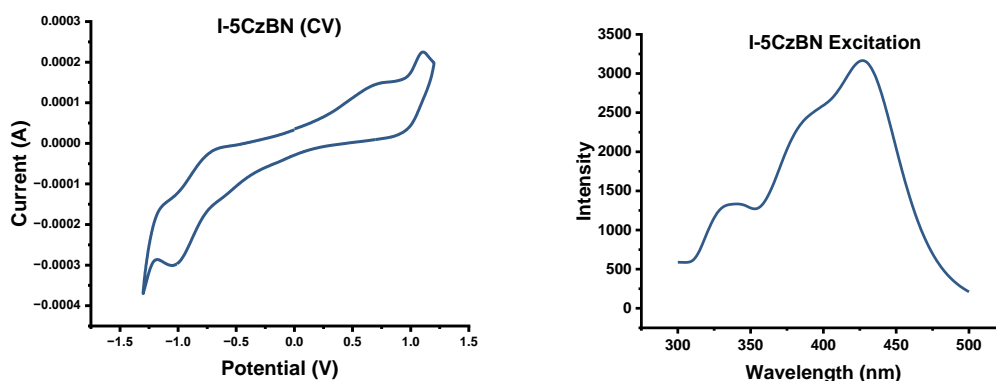

**Figure S9** Cyclic voltammogram of I-5CzBN (1 M) in DMF.  $E(\text{PC}^{+}/\text{PC}) = +1.1 \text{ V vs SCE}$  and optimal excitation wavelength.

The zero-zero vibrational state excitation energy  $E_{0,0}$  of I-5CzBN was estimated by the corresponding energy of the wavelength at optimal excitation (**426 nm**). Excited state oxidation and reduction potentials were calculated by the following approximating formulas:

$$E(\text{PC}^{+}/\text{PC}^*) = E(\text{PC}^{+}/\text{PC}) - E_{0,0}$$

The excited state oxidation potentials for Br-5CzBN were thus calculated:

$$E(\text{PC}^{+}/\text{PC}^*) = E(\text{PC}^{+}/\text{PC}) - E_{0,0} = 1.1 \text{ V} - 2.91 \text{ V}$$

$$E(\text{PC}^{+}/\text{PC}^*) = -1.81 \text{ V vs SCE}$$

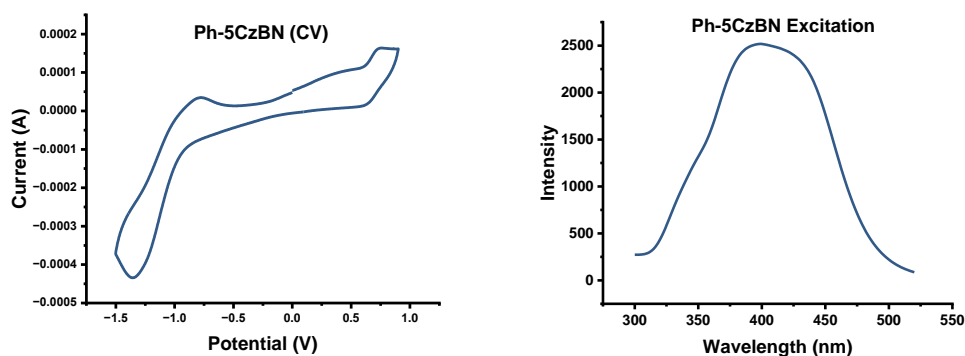

**Figure S10** Cyclic voltammogram of Ph-5CzBN (1 M) in DMF.  $E(\text{PC}^{+}/\text{PC}) = 0.77 \text{ V vs SCE}$  and optimal excitation wavelength.

The zero-zero vibrational state excitation energy  $E_{0,0}$  of Ph-5CzBN was estimated by the corresponding energy of the wavelength at optimal excitation (**398 nm**). Excited state oxidation and reduction potentials were calculated by the following approximating formulas:

$$E(\text{PC}^{+}/\text{PC}^*) = E(\text{PC}^{+}/\text{PC}) - E_{0,0}$$

The excited state oxidation potentials for Br-5CzBN were thus calculated:

$$E(\text{PC}^{+}/\text{PC}^*) = E(\text{PC}^{+}/\text{PC}) - E_{0,0} = 0.77 \text{ V} - 3.11 \text{ V}$$

$$E(\text{PC}^{+}/\text{PC}^*) = -2.34 \text{ V vs SCE}$$

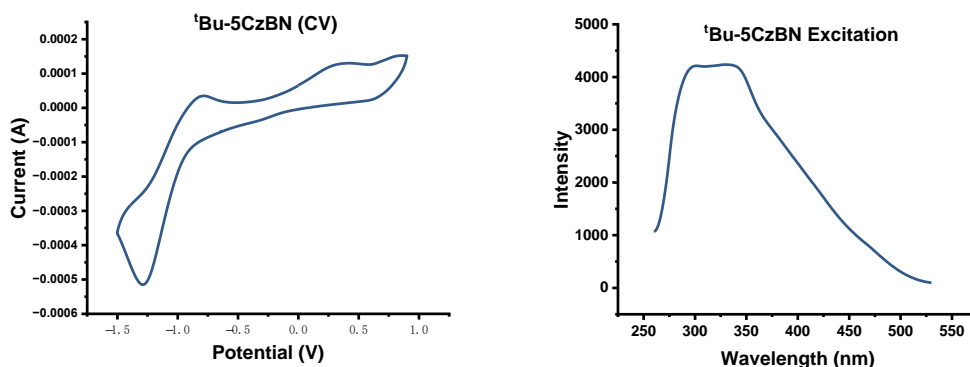

**Figure S11** Cyclic voltammogram of tBu-5CzBN (1 M) in DMF.  $E(\text{PC}^{+}/\text{PC}) = 0.83 \text{ eV vs SCE}$  and optimal excitation wavelength.

The zero-zero vibrational state excitation energy  $E_{0,0}$  of tBu-5CzBN was estimated by the corresponding energy of the wavelength at optimal excitation (**338 nm**). Excited state oxidation and reduction potentials were calculated by the following approximating formulas:

$$E(\text{PC}^{+}/\text{PC}^*) = E(\text{PC}^{+}/\text{PC}) - E_{0,0}$$

The excited state oxidation potentials for Br-5CzBN were thus calculated:

$$E(\text{PC}^{+}/\text{PC}^*) = E(\text{PC}^{+}/\text{PC}) - E_{0,0} = 0.83 \text{ V} - 3.66 \text{ V}$$

$$E(\text{PC}^{+}/\text{PC}^*) = -2.83 \text{ V vs SCE}$$

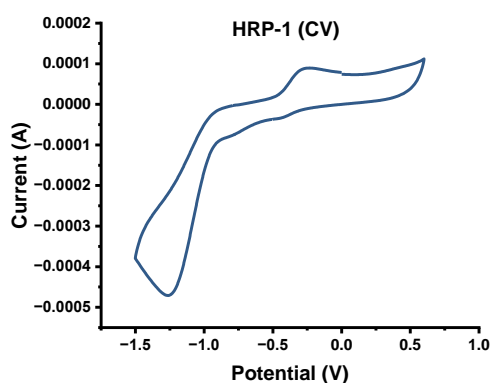

**Figure S12** Cyclic voltammogram of HRP-1 (1 M) in DMF.  $E_{\text{Red.}} = -1.35 \text{ V vs SCE}$ .

## Results and Discussion

Comparing the redox potentials of **HRP-1** and Br-5-CzBN clearly indicates that the Br-5-CzBN\* can facilitate the reduction cleavage of the N-O bond in **HRP-1**, resulting in the formation of nitrogen-centered radicals and oxygen anions. However, considering comprehensive factors during the reaction, such as the solubility of photoredox-catalysts within the system, the optimal concentration of photoredox-catalysts is ultimately determined by the yield of the desired target product.

## 6.5 Kinetic Isotope Effect experiments

In a 10 mL Schlenk tube, methanol (1.0 mmol) and methanol- $d_4$  (1.0 mmol), benzothiazole (1.0 equiv., 0.2 mmol), **HRP-1** (1.0 equiv., 0.2 mmol), Br-5CzBN (5 mol%) were dissolved in DMSO (2.0 mL) and  $\text{H}_2\text{O}$  (10.0  $\mu\text{L}$ ), and then charging with nitrogen more than three times. The tube was stirred for 4 h with the irradiation of 10 W blue LED ( $\lambda = 460 \text{ nm}$ ), at  $40^\circ\text{C}$ . After the reaction, the mixture was extracted with saturated sodium bicarbonate solution and ethyl acetate, and the organic layer was washed with saturated brine and dried over anhydrous  $\text{Na}_2\text{SO}_4$ . After filtration, the solvent was evaporated in vacuo, and the residue was purified by column chromatography on silica gel to afford the desired product (19% yield). Following this, we carried out NMR analysis, which yielded a  $k_{\text{H}}/k_{\text{D}}$  value of 5.6. This result not only confirmed the validity of our HAT process but also suggested that the HAT process is the rate-determining step within our catalytic system.

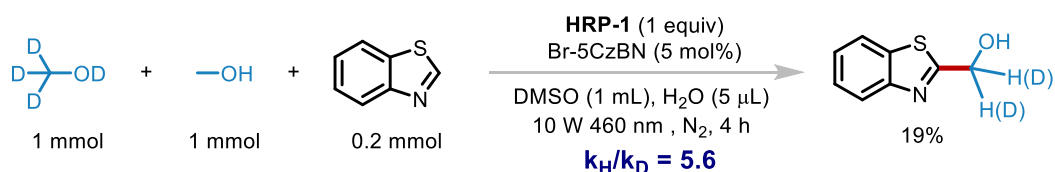

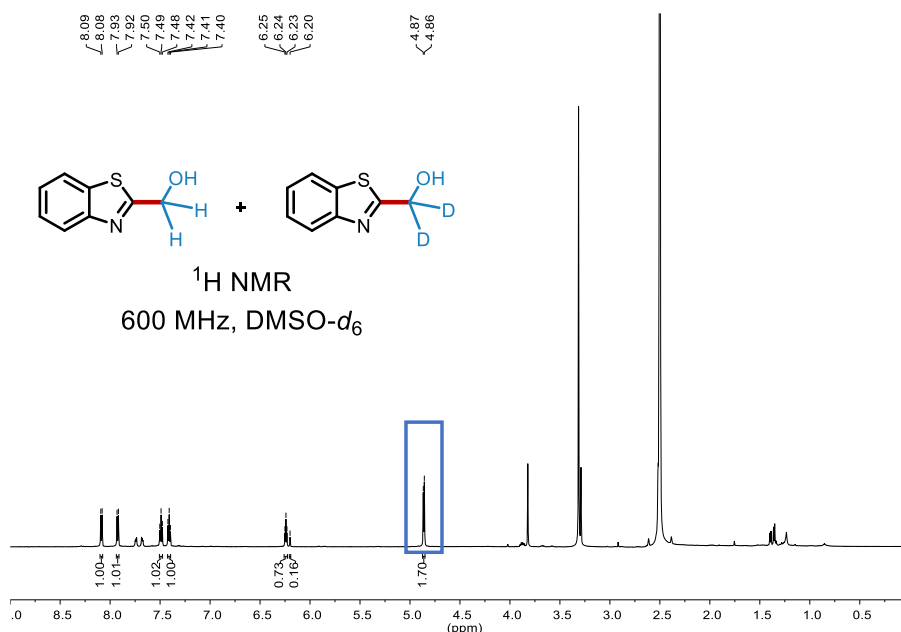

Figure S13 <sup>1</sup>H NMR of mixture product from methanol and methanol-*d*<sub>4</sub>

## 7. Other information

### 7.1 Substrate Propylene Glycol Site Selectivity

The synthesis of product **26** was conducted with particular attention to potential byproduct formation at the α-position relative to the primary alcohol functionality. Through comprehensive analytical characterization, no evidence of primary-alcohol-heteroarylated product formation was detected. This observation can be rationalized by considering the stability of the radical intermediate, which appears to effectively suppress the formation of such byproducts (Figure S14).

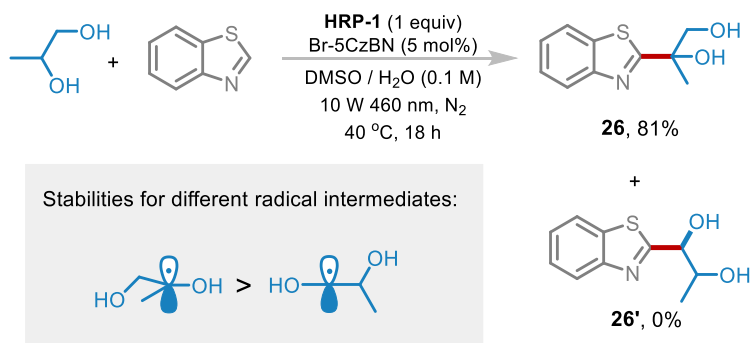

Figure S14 Stability for de radical generated during the HAT process



## 7.2 Unsuccessful substrates

CF<sub>3</sub>CH<sub>2</sub>OH and 4-methylbenzonitrile

CF<sub>3</sub>CH<sub>2</sub>OH exhibited poor reactivity in our initial experiments. Our analysis suggests that this is primarily due to the high polarity of the CF<sub>3</sub>CH<sub>2</sub>OH radical ( $\omega = 1.21$  eV), which is significantly higher than that of the ethanol radical ( $\omega = 0.6$  eV) and approaches the critical polarity value of 2.0 eV.<sup>2</sup> This high polarity may hinder the desired reaction pathway, as similar trends have been reported in the literature.<sup>3</sup> The poor reactivity of 4-methylbenzonitrile may be due to reasons similar to those observed with CF<sub>3</sub>CH<sub>2</sub>OH (Figure S15). We attempted to enhance the reactivity by increasing the substrate equivalents and modifying the reaction conditions, such as extending reaction times and elevating temperatures. However, these adjustments did not yield the desired improvements.

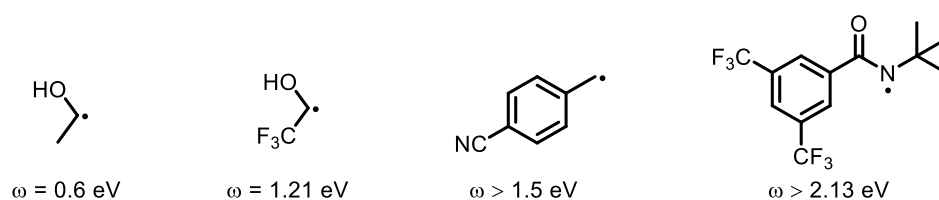

Figure S15 The polarity of corresponding radicals during HAT process

## 8. Characterization data for photoredox-catalysts, HRP, and products

### tert-butyl 2-(benzo[d]thiazol-2-yl)pyrrolidine-1-carboxylate (**3**)<sup>4</sup>

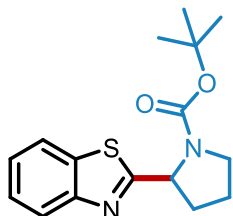

Follow the general procedure A. **3** was purified by flash chromatography (silica gel, petroleum ether/ethyl acetate from 20:1 to 5:1, v/v) to give the desired product: colorless oil (51.7 mg, 85%),

**<sup>1</sup>H NMR** (600 MHz, Chloroform-*d*)  $\delta$  8.01 – 7.94 (m, 1H), 7.90 – 7.82 (m, 1H), 7.50 – 7.40 (m, 1H), 7.40 – 7.33 (m, 1H), 5.36 – 5.19 (m, 1H), 3.71 – 3.45 (m, 2H), 2.51 – 2.22 (m, 2H), 2.07 – 1.93 (m, 2H), 1.40 (br s, 9H).

**<sup>13</sup>C NMR** (151 MHz, Chloroform-*d*)  $\delta$  177.5, 176.8, 154.2, 154.1, 152.4, 136.4, 129.5, 129.3, 124.3, 123.9, 118.4, 59.9, 59.5, 47.1, 46.8, 34.1, 32.8, 28.4, 28.2, 24.2, 23.4

### 2-(tetrahydrofuran-2-yl)benzo[d]thiazole (**4**)<sup>5</sup>

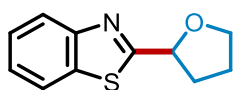

Follow the general procedure A. **4** was purified by flash chromatography (silica gel, petroleum ether/ethyl acetate from 20:1 to 5:1, v/v) to give the desired product: colorless oil (34.0 mg, 83%),

**<sup>1</sup>H NMR** (600 MHz, Chloroform-*d*)  $\delta$  8.00 – 7.96 (m, 1H), 7.92 – 7.85 (m, 1H), 7.49 – 7.44 (m, 1H), 7.39 – 7.34 (m, 1H), 5.38 – 5.33 (m, 1H), 4.19 – 4.13 (m, 1H), 4.04 – 3.98 (m, 1H), 2.56 – 2.49 (m, 1H), 2.31 – 2.24 (m, 1H), 2.08 – 2.01 (m, 2H).

**<sup>13</sup>C NMR** (151 MHz, Chloroform-*d*)  $\delta$  176.3, 153.7, 134.8, 125.9, 124.8, 122.8, 121.8, 78.8, 69.5, 33.4, 25.7.

### 2-(1,4-dioxan-2-yl)benzo[d]thiazole (**5**)<sup>6</sup>

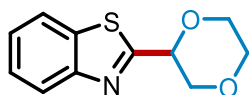

Follow the general procedure A. **5** was purified by flash chromatography (silica gel, petroleum ether/ethyl acetate from 20:1 to 5:1, v/v) to give the desired product: colorless oil (34.9 mg, 79%).

**<sup>1</sup>H NMR** (600 MHz, Chloroform-*d*)  $\delta$  8.03 – 7.99 (m, 1H), 7.94 – 7.90 (m, 1H), 7.51 – 7.46 (m, 1H), 7.42 – 7.37 (m, 1H), 5.09 – 5.03 (m, 1H), 4.33 – 4.27 (m, 1H), 4.05 – 3.95 (m, 2H), 3.88 – 3.81 (m, 1H), 3.81 – 3.75 (m, 1H), 3.75 – 3.67 (m, 1H).

**<sup>13</sup>C NMR** (151 MHz, Chloroform-*d*) δ 169.0, 153.0, 134.6, 126.1, 125.1, 123.1, 121.8, 75.5, 70.5, 67.0, 66.4.

**2-(1-ethoxyethyl)benzo[d]thiazole (6)<sup>6</sup>**

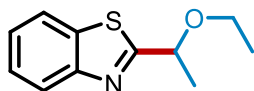

Follow the general procedure A. **6** was purified by flash chromatography (silica gel, petroleum ether/ethyl acetate from 20:1 to 5:1, v/v) to give the desired product: colorless oil (33.5 mg, 81%).

**<sup>1</sup>H NMR** (600 MHz, Chloroform-*d*) δ 8.01 – 7.97 (m, 1H), 7.92 – 7.88 (m, 1H), 7.49 – 7.45 (m, 1H), 7.40 – 7.36 (m, 1H), 4.89 – 4.83 (m, 1H), 3.65 – 3.60 (m, 2H), 1.65 – 1.64 (m, 3H), 1.28 – 1.26 (m, 3H).

**<sup>13</sup>C NMR** (151 MHz, Chloroform-*d*) δ 176.7, 153.2, 134.9, 125.9, 125.0, 122.9, 121.9, 76.1, 65.5, 22.7, 15.3.

**2-(1,3-dioxolan-2-yl)benzo[d]thiazole (7)<sup>7</sup>**

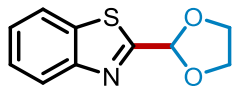

Follow the general procedure A. **7** was purified by flash chromatography (silica gel, petroleum ether/ethyl acetate from 20:1 to 5:1, v/v) to give the desired product: colorless oil (33.1 mg, 80%).

**<sup>1</sup>H NMR** (600 MHz, Chloroform-*d*) δ 8.10 – 8.06 (m, 1H), 7.94 – 7.90 (m, 1H), 7.53 – 7.49 (m, 1H), 7.45 – 7.41 (m, 1H), 6.25 (s, 1H), 4.24 – 4.18 (m, 2H), 4.17 – 4.11 (m, 2H).

**<sup>13</sup>C NMR** (151 MHz, Chloroform-*d*) δ 169.2, 153.3, 135.0, 126.2, 125.7, 123.8, 121.9, 100.6, 65.7.

**2-(benzo[d][1,3]dioxol-2-yl)benzo[d]thiazole (8)<sup>6</sup>**

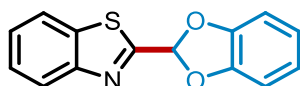

Follow the general procedure A. **8** was purified by flash chromatography (silica gel, petroleum ether/ethyl acetate from 20:1 to 5:1, v/v) to give the desired product: colorless oil (33.2 mg, 65%).

**<sup>1</sup>H NMR** (600 MHz, Chloroform-*d*) δ 8.15 – 8.11 (m, 1H), 7.93 – 7.89 (m, 1H), 7.56 – 7.51 (m, 1H), 7.48 – 7.43 (m, 1H), 7.31 (s, 1H), 6.98 – 6.89 (m, 4H).

**<sup>13</sup>C NMR** (151 MHz, Chloroform-*d*) δ 166.0, 153.0, 146.5, 134.9, 126.6, 126.3, 124.1, 122.5, 122.0, 109.2, 105.7.

**N-(benzo[d]thiazol-2-ylmethyl)-N-methylacetamide (9)<sup>8</sup>**

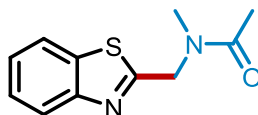

Follow the general procedure A. **9** was purified by flash chromatography (silica gel,

petroleum ether/ethyl acetate from 20:1 to 5:1, v/v) to give the desired product: colorless oil (32.1 mg, 73%).

**<sup>1</sup>H NMR** (600 MHz, Chloroform-*d*)  $\delta$  8.03 – 7.98 (m, 1H), 7.91 – 7.84 (m, 1H), 7.54 – 7.45 (m, 1H), 7.44 – 7.36 (m, 1H), 4.99 – 4.88 (m, 2H), 3.15 – 3.09 (m, 3H), 2.25 – 2.17 (m, 3H).

**<sup>13</sup>C NMR** (151 MHz, Chloroform-*d*)  $\delta$  170.93, 170.88, 168.1, 167.8, 153.3, 152.8, 135.7, 134.8, 126.5, 126.1, 125.5, 125.2, 123.2, 123.0, 121.9, 121.8, 53.1, 49.4, 36.4, 34.4, 21.6, 21.5.

#### 4-(benzo[d]thiazol-2-yl)-1,3-dimethylimidazolidin-2-one (10)<sup>9</sup>

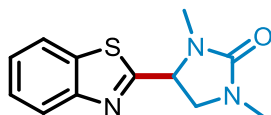

Follow the general procedure A. **10** was purified by flash chromatography (silica gel, petroleum ether/ethyl acetate from 20:1 to 5:1, v/v) to give the desired product: colorless oil (38.0 mg, 77%),

**<sup>1</sup>H NMR** (400 MHz, Chloroform-*d*)  $\delta$  8.04 – 7.99 (m, 1H), 7.94 – 7.89 (m, 1H), 7.54 – 7.48 (m, 1H), 7.45 – 7.40 (m, 1H), 4.96 – 4.88 (m, 1H), 3.89 – 3.79 (m, 1H), 3.42 – 3.34 (m, 1H), 2.89 – 2.83 (m, 6H).

**<sup>13</sup>C NMR** (101 MHz, Chloroform-*d*)  $\delta$  171.6, 160.8, 153.1, 135.1, 126.3, 125.6, 123.3, 122.0, 58.9, 52.1, 31.1, 30.6.

#### N-(benzo[d]thiazol-2-ylmethyl)-N-methylformamide (11)<sup>8</sup>

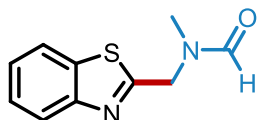

Follow the general procedure A. **11** was purified by flash chromatography (silica gel, petroleum ether/ethyl acetate from 20:1 to 5:1, v/v) to give the desired product: colorless oil (33.0 mg, 80%).

**<sup>1</sup>H NMR** (400 MHz, Chloroform-*d*)  $\delta$  8.38 – 8.18 (m, 1H), 8.08 – 7.98 (m, 1H), 7.95 – 7.83 (m, 1H), 7.59 – 7.38 (m, 2H), 4.98 – 4.81 (m, 2H), 3.12 – 2.97 (m, 3H).

**<sup>13</sup>C NMR** (101 MHz, Chloroform-*d*)  $\delta$  166.2, 162.6, 162.4, 135.7, 126.4, 126.1, 125.6, 125.3, 123.3, 123.1, 121.8, 121.7, 51.6, 46.2, 34.5, 30.3.

#### 3-cyclopentyl-1-methylquinoxalin-2(1H)-one (12)<sup>10</sup>

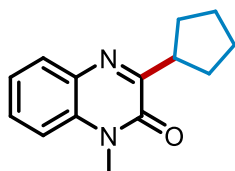

Follow the general procedure A. **12** was purified by flash chromatography (silica gel, petroleum ether/ethyl acetate from 20:1 to 5:1, v/v) to give the desired product: colorless oil (31.0 mg, 68%).

**<sup>1</sup>H NMR** (600 MHz, Chloroform-*d*)  $\delta$  7.84 – 7.81 (m, 1H), 7.53 – 7.48 (m, 1H), 7.35 – 7.30

(m, 1H), 7.30 – 7.27 (m, 1H), 3.75 – 3.68 (m, 4H), 2.10 – 2.03 (m, 2H), 1.96 – 1.89 (m, 2H), 1.86 – 1.78 (m, 2H), 1.75 – 1.67 (m, 2H).

**<sup>13</sup>C NMR** (151 MHz, Chloroform-*d*) δ 163.7, 155.0, 133.0, 132.7, 129.8, 129.3, 123.4, 113.4, 42.7, 30.8, 29.0, 25.9.

### 3-cyclohexyl-1-methylquinoxalin-2(1H)-one (**13**)<sup>10</sup>

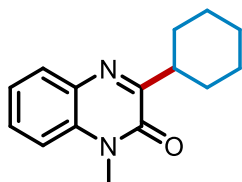

Follow the general procedure A. **13** was purified by flash chromatography (silica gel, petroleum ether/ethyl acetate from 20:1 to 5:1, v/v) to give the desired product: colorless oil (36.3 mg, 75%).

**<sup>1</sup>H NMR** (600 MHz, Chloroform-*d*) δ 7.85 – 7.82 (m, 1H), 7.53 – 7.49 (m, 1H), 7.35 – 7.30 (m, 1H), 7.30 – 7.27 (m, 1H), 3.70 (s, 3H), 3.38 – 3.31 (m, 1H), 1.99 – 1.93 (m, 2H), 1.90 – 1.84 (m, 2H), 1.80 – 1.74 (m, 1H), 1.59 – 1.53 (m, 2H), 1.51 – 1.43 (m, 2H), 1.35 – 1.29 (m, 1H).

**<sup>13</sup>C NMR** (151 MHz, Chloroform-*d*) δ 164.3, 154.6, 132.91, 132.88, 129.8, 129.4, 123.4, 113.4, 40.8, 30.5, 29.1, 26.3, 26.2.

### 3-cycloheptyl-1-methylquinoxalin-2(1H)-one (**14**)<sup>11</sup>

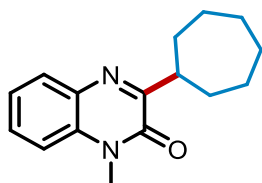

Follow the general procedure A. **14** was purified by flash chromatography (silica gel, petroleum ether/ethyl acetate from 20:1 to 5:1, v/v) to give the desired product: colorless oil (36.3 mg, 71%).

**<sup>1</sup>H NMR** (600 MHz, Chloroform-*d*) δ 7.84 – 7.81 (m, 1H), 7.52 – 7.48 (m, 1H), 7.34 – 7.30 (m, 1H), 7.29 – 7.27 (m, 1H), 3.70 (s, 3H), 3.52 – 3.45 (m, 1H), 2.01 – 1.94 (m, 2H), 1.88 – 1.76 (m, 4H), 1.75 – 1.67 (m, 2H), 1.66 – 1.59 (m, 4H).

**<sup>13</sup>C NMR** (151 MHz, Chloroform-*d*) δ 165.4, 154.5, 132.9, 132.8, 129.7, 129.3, 123.4, 113.4, 42.5, 32.3, 29.1, 28.2, 27.1.

### 3-cyclooctyl-1-methylquinoxalin-2(1H)-one (**15**)<sup>11</sup>

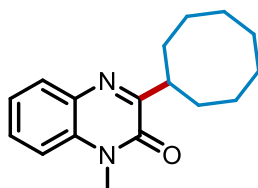

Follow the general procedure A. **15** was purified by flash chromatography (silica gel, petroleum ether/ethyl acetate from 20:1 to 5:1, v/v) to give the desired product: colorless

oil (32.4 mg, 60%).

**<sup>1</sup>H NMR** (600 MHz, Chloroform-*d*)  $\delta$  7.85 – 7.82 (m, 1H), 7.53 – 7.49 (m, 1H), 7.35 – 7.31 (m, 1H), 7.30 – 7.27 (m, 1H), 3.70 (s, 3H), 3.60 – 3.53 (m, 1H), 1.91 – 1.87 (m, 4H), 1.84 – 1.79 (m, 2H), 1.72 – 1.61 (m, 8H).

**<sup>13</sup>C NMR** (151 MHz, Chloroform-*d*)  $\delta$  165.8, 154.5, 132.9, 132.8, 129.7, 129.3, 123.4, 113.4, 40.5, 30.6, 29.1, 26.7, 26.6, 25.9.

### 3-cyclododecyl-1-methylquinoxalin-2(1H)-one (16)<sup>12</sup>

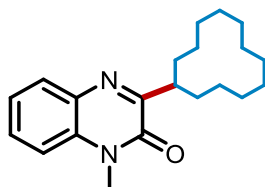

Follow the general procedure A. **16** was purified by flash chromatography (silica gel, petroleum ether/ethyl acetate from 20:1 to 5:1, v/v) to give the desired product: colorless oil (35.9 mg, 55 %).

**<sup>1</sup>H NMR** (600 MHz, Chloroform-*d*)  $\delta$  7.87 – 7.84 (m, 1H), 7.53 – 7.49 (m, 1H), 7.35 – 7.31 (m, 1H), 7.30 – 7.27 (m, 1H), 3.71 (s, 4H), 1.82 – 1.73 (m, 4H), 1.66 – 1.59 (m, 2H), 1.51 – 1.41 (m, 7H), 1.41 – 1.26 (m, 10H).

**<sup>13</sup>C NMR** (151 MHz, Chloroform-*d*)  $\delta$  164.5, 154.9, 132.88, 132.85, 129.8, 129.3, 123.3, 113.4, 36.2, 29.1, 28.1, 24.0, 23.9, 23.6, 23.3, 23.1.

### benzo[d]thiazol-2-ylmethanol (17)<sup>6</sup>

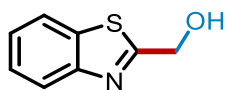

Follow the general procedure B. **17** was purified by flash chromatography (silica gel, petroleum ether/ethyl acetate from 20:1 to 5:1, v/v) to give the desired product: white solid (24.8 mg, 75%).

**<sup>1</sup>H NMR** (600 MHz, Chloroform-*d*)  $\delta$  8.02 – 7.98 (m, 1H), 7.92 – 7.88 (m, 1H), 7.51 – 7.47 (m, 1H), 7.42 – 7.38 (m, 1H), 5.09 (s, 2H), 3.06 (s, 1H).

**<sup>13</sup>C NMR** (151 MHz, Chloroform-*d*)  $\delta$  152.8, 134.8, 126.2, 125.1, 122.9, 121.9, 62.8.

### 1-(benzo[d]thiazol-2-yl)ethan-1-ol (18)<sup>6</sup>

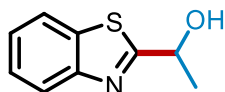

Follow the general procedure B. **18** was purified by flash chromatography (silica gel, petroleum ether/ethyl acetate from 20:1 to 5:1, v/v) to give the desired product: colorless oil (31.2 mg, 87%),

**<sup>1</sup>H NMR** (600 MHz, Chloroform-*d*)  $\delta$  8.00 – 7.97 (m, 1H), 7.90 – 7.88 (m, 1H), 7.50 – 7.46 (m, 1H), 7.40 – 7.37 (m, 1H), 5.28 – 5.24 (m, 1H), 3.34 (s, 1H), 1.73 – 1.71 (m, 3H).

**<sup>13</sup>C NMR** (151 MHz, Chloroform-*d*)  $\delta$  176.7, 152.8, 134.9, 126.1, 125.1, 122.9, 121.9, 68.6,



24.1.

**1-(benzo[d]thiazol-2-yl)butan-1-ol(19)<sup>6</sup>**

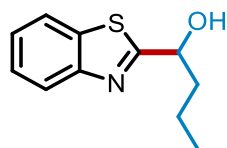

Follow the general procedure B. **19** was purified by flash chromatography (silica gel, petroleum ether/ethyl acetate from 20:1 to 5:1, v/v) to give the desired product: colorless oil (31.1 mg, 75 %).

**<sup>1</sup>H NMR** (600 MHz, Chloroform-*d*)  $\delta$  8.00 – 7.96 (m, 1H), 7.90 – 7.87 (m, 1H), 7.49 – 7.45 (m, 1H), 7.40 – 7.36 (m, 1H), 5.13 – 5.09 (m, 1H), 3.26 (s, 1H), 2.05 – 1.98 (m, 1H), 1.95 – 1.88 (m, 1H), 1.62 – 1.48 (m, 2H), 1.01 – 0.96 (m, 3H).

**<sup>13</sup>C NMR** (151 MHz, Chloroform-*d*)  $\delta$  176.3, 152.8, 134.8, 126.1, 125.0, 122.9, 121.8, 72.2, 40.2, 18.4, 13.8.

**1-(benzo[d]thiazol-2-yl)-2-methylpropan-1-ol (20)<sup>13</sup>**

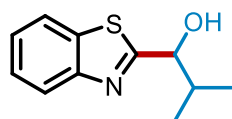

Follow the general procedure B. **20** was purified by flash chromatography (silica gel, petroleum ether/ethyl acetate from 20:1 to 5:1, v/v) to give the desired product: colorless oil (30.6 mg, 74 %).

**<sup>1</sup>H NMR** (600 MHz, Chloroform-*d*)  $\delta$  8.01 – 7.98 (m, 1H), 7.90 – 7.87 (m, 1H), 7.50 – 7.46 (m, 1H), 7.40 – 7.36 (m, 1H), 4.94 – 4.89 (m, 1H), 3.22 – 3.14 (m, 1H), 2.33 – 2.24 (m, 1H), 1.10 – 1.07 (m, 3H), 0.99 – 0.97 (m, 3H).

**<sup>13</sup>C NMR** (151 MHz, Chloroform-*d*)  $\delta$  175.2, 152.6, 134.9, 126.0, 125.0, 122.9, 121.8, 35.2, 19.0, 16.3.

**2-(benzo[d]thiazol-2-yl)propan-2-ol (21)<sup>14</sup>**

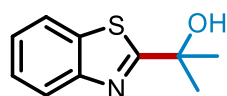

Follow the general procedure B. **21** was purified by flash chromatography (silica gel, petroleum ether/ethyl acetate from 20:1 to 5:1, v/v) to give the desired product: colorless oil (34.8 mg, 90 %).

**<sup>1</sup>H NMR** (600 MHz, Chloroform-*d*)  $\delta$  8.00 – 7.96 (m, 1H), 7.90 – 7.86 (m, 1H), 7.49 – 7.44 (m, 1H), 7.39 – 7.34 (m, 1H), 3.27 (s, 1H), 1.75 (s, 6H).

**<sup>13</sup>C NMR** (151 MHz, Chloroform-*d*)  $\delta$  180.0, 153.0, 135.4, 126.0, 124.9, 122.9, 121.8, 73.6, 30.8.

**2-(benzo[d]thiazol-2-yl)butan-2-ol (22)<sup>13</sup>**

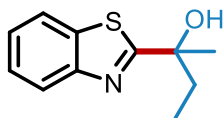

Follow the general procedure B. **22** was purified by flash chromatography (silica gel, petroleum ether/ethyl acetate from 20:1 to 5:1, v/v) to give the desired product: colorless oil (35.2 mg, 85 %).

**<sup>1</sup>H NMR** (600 MHz, Chloroform-*d*)  $\delta$  8.02 – 7.98 (m, 1H), 7.91 – 7.87 (m, 1H), 7.50 – 7.46 (m, 1H), 7.41 – 7.36 (m, 1H), 3.35 (s, 1H), 2.10 – 1.98 (m, 2H), 1.72 (s, 3H), 0.95 – 0.91 (m, 3H).

**<sup>13</sup>C NMR** (151 MHz, Chloroform-*d*)  $\delta$  135.4, 126.1, 125.0, 122.8, 121.8, 36.4, 29.2, 8.0.

**1-(benzo[d]thiazol-2-yl)cyclopentan-1-ol (23)<sup>13</sup>**

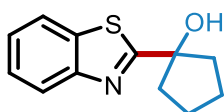

Follow the general procedure B. **23** was purified by flash chromatography (silica gel, petroleum ether/ethyl acetate from 20:1 to 5:1, v/v) to give the desired product: colorless oil (35.1 mg, 80 %).

**<sup>1</sup>H NMR** (400 MHz, Chloroform-*d*)  $\delta$  8.01 – 7.95 (m, 1H), 7.91 – 7.85 (m, 1H), 7.50 – 7.43 (m, 1H), 7.41 – 7.33 (m, 1H), 3.07 (s, 1H), 2.39 – 2.25 (m, 2H), 2.16 – 2.06 (m, 2H), 2.06 – 1.89 (m, 4H).

**<sup>13</sup>C NMR** (101 MHz, Chloroform-*d*)  $\delta$  179.0, 153.1, 135.5, 125.9, 124.8, 122.8, 121.6, 83.9, 42.8, 24.3.

**1-(benzo[d]thiazol-2-yl)cyclohexan-1-ol (24)<sup>15</sup>**

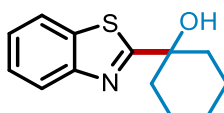

Follow the general procedure B. **24** was purified by flash chromatography (silica gel, petroleum ether/ethyl acetate from 20:1 to 5:1, v/v) to give the desired product: colorless oil (41.0 mg, 88%),

**<sup>1</sup>H NMR** (600 MHz, Chloroform-*d*)  $\delta$  8.00 – 7.97 (m, 1H), 7.90 – 7.86 (m, 1H), 7.49 – 7.44 (m, 1H), 7.38 – 7.34 (m, 1H), 2.92 (s, 1H), 2.12 – 2.04 (m, 2H), 1.99 – 1.93 (m, 2H), 1.83 – 1.71 (m, 5H), 1.46 – 1.37 (m, 1H).

**<sup>13</sup>C NMR** (151 MHz, Chloroform-*d*)  $\delta$  180.7, 153.2, 135.2, 125.9, 124.8, 122.9, 121.8, 74.8, 38.5, 25.1, 21.7.

**2-(benzo[d]thiazol-2-yl)butane-1,2-diol (25)<sup>13</sup>**

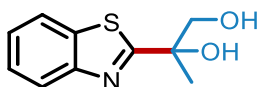

Follow the general procedure B. **25** was purified by flash chromatography (silica gel, petroleum ether/ethyl acetate from 20:1 to 5:1, v/v) to give the desired product: colorless

oil (33.7 mg, 81%).

**<sup>1</sup>H NMR** (400 MHz, Chloroform-*d*) δ 8.01 – 7.94 (m, 1H), 7.92 – 7.85 (m, 1H), 7.51 – 7.44 (m, 1H), 7.42 – 7.36 (m, 1H), 4.22 – 4.15 (m, 1H), 3.84 – 3.77 (m, 1H), 1.65 (s, 3H).

**<sup>13</sup>C NMR** (101 MHz, Chloroform-*d*) δ 177.8, 152.7, 135.2, 126.1, 125.2, 122.9, 121.8, 75.7, 70.0, 25.6.

**3-benzyl-1-methylquinoxalin-2(1H)-one (27)<sup>16</sup>**

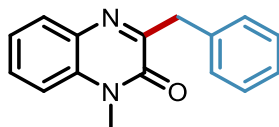

Follow the general procedure C. **27** was purified by flash chromatography (silica gel, petroleum ether/ethyl acetate from 20:1 to 10:1, v/v) to give the desired product: colorless oil (35.5 mg, 71%).

**<sup>1</sup>H NMR** (600 MHz, Chloroform-*d*) δ 7.87 – 7.84 (m, 1H), 7.54 – 7.49 (m, 1H), 7.49 – 7.45 (m, 2H), 7.35 – 7.31 (m, 1H), 7.31 – 7.25 (m, 3H), 7.23 – 7.18 (m, 1H), 4.27 (s, 2H), 3.66 (s, 3H).

**<sup>13</sup>C NMR** (151 MHz, Chloroform-*d*) δ 159.3, 154.7, 137.1, 133.4, 132.8, 130.0, 129.9, 129.5, 128.4, 126.6, 123.6, 113.5, 40.8, 29.1.

**1-methyl-3-(1-phenylethyl)quinoxalin-2(1H)-one (28)<sup>17</sup>**

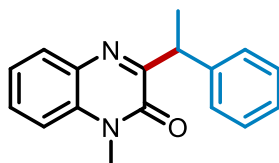

Follow the general procedure C. **28** was purified by flash chromatography (silica gel, petroleum ether/ethyl acetate from 20:1 to 10:1, v/v) to give the desired product: colorless oil (42.3 mg, 80%).

**<sup>1</sup>H NMR** (600 MHz, Chloroform-*d*) δ 7.94 – 7.91 (m, 1H), 7.53 – 7.49 (m, 1H), 7.46 – 7.42 (m, 2H), 7.37 – 7.32 (m, 1H), 7.29 – 7.24 (m, 3H), 7.20 – 7.15 (m, 1H), 4.87 – 4.78 (m, 1H), 3.62 (s, 3H), 1.70 – 1.67 (m, 3H).

**<sup>13</sup>C NMR** (151 MHz, Chloroform-*d*) δ 161.9, 154.4, 143.1, 133.1, 132.7, 130.1, 129.7, 128.4, 128.1, 126.5, 123.4, 113.5, 41.9, 29.1, 19.7.

**1-methyl-3-(1-phenylpropyl)quinoxalin-2(1H)-one (29)<sup>18</sup>**

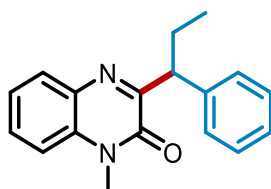

Follow the general procedure C. **29** was purified by flash chromatography (silica gel, petroleum ether/ethyl acetate from 20:1 to 10:1, v/v) to give the desired product: colorless oil (42.8 mg, 77%).

**<sup>1</sup>H NMR** (600 MHz, Chloroform-*d*) δ 7.94 – 7.91 (m, 1H), 7.53 – 7.49 (m, 1H), 7.47 – 7.43 (m, 2H), 7.36 – 7.32 (m, 1H), 7.28 – 7.25 (m, 3H), 7.19 – 7.15 (m, 1H), 4.60 – 4.56 (m, 1H), 3.62 (s, 3H), 2.36 – 2.27 (m, 1H), 2.09 (dt, *J* = 13.5, 7.5 Hz, 1H), 0.94 – 0.89 (m, 3H).

**<sup>13</sup>C NMR** (151 MHz, Chloroform-*d*) δ 161.4, 154.6, 141.6, 133.0, 132.8, 130.1, 129.6, 128.7, 128.3, 126.5, 123.4, 113.5, 49.2, 29.1, 27.1, 12.5.

### 1-methyl-3-(1,2,3,4-tetrahydronaphthalen-1-yl)quinoxalin-2(1H)-one (30)

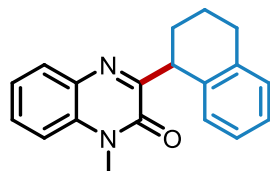

Follow the general procedure C. **30** was purified by flash chromatography (silica gel, petroleum ether/ethyl acetate from 50:1 to 10:1, v/v) to give the desired product: colorless oil (40.6 mg, 70%).

**<sup>1</sup>H NMR** (600 MHz, Chloroform-*d*) δ 7.79 – 7.76 (m, 1H), 7.54 – 7.50 (m, 1H), 7.32 – 7.28 (m, 2H), 7.18 – 7.10 (m, 2H), 7.05 – 7.01 (m, 1H), 6.92 – 6.89 (m, 1H), 4.90 – 4.86 (m, 1H), 3.72 (s, 3H), 3.03 – 2.96 (m, 1H), 2.89 – 2.81 (m, 1H), 2.21 – 2.16 (m, 2H), 2.10 – 2.03 (m, 1H), 1.86 – 1.77 (m, 1H).

**<sup>13</sup>C NMR** (151 MHz, Chloroform-*d*) δ 163.9, 154.5, 137.8, 137.1, 133.2, 132.7, 130.1, 129.8, 129.2, 128.8, 125.9, 125.6, 123.4, 113.4, 43.1, 29.7, 29.2, 28.0, 21.3.

**HRMS** (ESI-TOF): *m/z*: [M + K]<sup>+</sup> Calcd for C<sub>19</sub>H<sub>18</sub>N<sub>2</sub>OK<sup>+</sup> 329.1051; Found 329.1049.

### 3-(4-fluorobenzyl)-1-methylquinoxalin-2(1H)-one (31)<sup>19</sup>

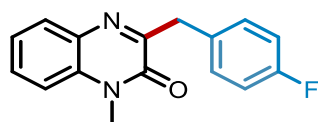

Follow the general procedure C. **31** was purified by flash chromatography (silica gel, petroleum ether/ethyl acetate from 20:1 to 10:1, v/v) to give the desired product: colorless oil (32.2 mg, 50%).

**<sup>1</sup>H NMR** (600 MHz, Chloroform-*d*) δ 7.86 – 7.84 (m, 1H), 7.56 – 7.51 (m, 1H), 7.45 – 7.40 (m, 2H), 7.37 – 7.33 (m, 1H), 7.29 – 7.27 (m, 1H), 6.99 – 6.95 (m, 2H), 4.23 (s, 2H), 3.67 (s, 3H).

**<sup>13</sup>C NMR** (151 MHz, Chloroform-*d*) δ 162.6, 161.0, 159.1, 154.7, 133.3, 132.7, 132.6, 132.6, 131.02, 130.97, 129.98, 129.97, 123.6, 115.2, 115.1, 113.6, 39.9, 29.1.

**<sup>19</sup>F NMR** (565 MHz, Chloroform-*d*) δ -116.65.

### 3-(4-(tert-butyl)benzyl)-1-methylquinoxalin-2(1H)-one (32)<sup>19</sup>

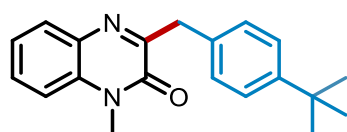

Follow the general procedure C. **32** was purified by flash chromatography (silica gel,

petroleum ether/ethyl acetate from 20:1 to 10:1, v/v) to give the desired product: colorless oil (42.7 mg, 70%).

**<sup>1</sup>H NMR** (600 MHz, Chloroform-*d*)  $\delta$  7.87 – 7.84 (m, 1H), 7.53 – 7.49 (m, 1H), 7.43 – 7.39 (m, 2H), 7.35 – 7.31 (m, 2H), 7.26 – 7.24 (m, 1H), 4.23 (s, 2H), 3.66 (s, 3H), 1.28 (s, 9H).

**<sup>13</sup>C NMR** (151 MHz, Chloroform-*d*)  $\delta$  159.5, 154.8, 149.3, 133.9, 133.4, 132.8, 129.9, 129.8, 129.2, 125.3, 123.5, 113.5, 40.3, 34.4, 31.4, 29.1.

**3-benzoyl-1-methylquinoxalin-2(1H)-one (34)<sup>16</sup>**

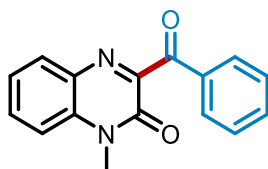

Follow the general procedure D. **34** was purified by flash chromatography (silica gel, petroleum ether/ethyl acetate from 5:1 to 2:1, v/v) to give the desired product: colorless oil (40.1 mg, 76%).

**<sup>1</sup>H NMR** (600 MHz, Chloroform-*d*)  $\delta$  8.01 – 7.98 (m, 2H), 7.96 – 7.92 (m, 1H), 7.71 – 7.67 (m, 1H), 7.65 – 7.60 (m, 1H), 7.51 – 7.47 (m, 2H), 7.44 – 7.40 (m, 2H), 3.76 (s, 3H).

**<sup>13</sup>C NMR** (151 MHz, Chloroform-*d*)  $\delta$  191.7, 134.9, 134.2, 133.9, 132.0, 131.1, 130.0, 128.7, 124.2, 114.0, 29.1.

**3-(4-fluorobenzoyl)-1-methylquinoxalin-2(1H)-one (35)<sup>20</sup>**

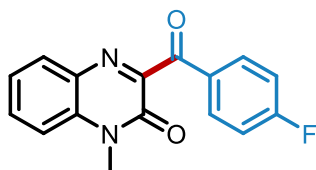

Follow the general procedure C. **35** was purified by flash chromatography (silica gel, petroleum ether/ethyl acetate from 5:1 to 2:1, v/v) to give the desired product: colorless oil (33.9 mg, 60%).

**<sup>1</sup>H NMR** (400 MHz, Chloroform-*d*)  $\delta$  8.06 – 8.00 (m, 2H), 7.95 – 7.90 (m, 1H), 7.72 – 7.66 (m, 1H), 7.45 – 7.39 (m, 2H), 7.20 – 7.12 (m, 2H), 3.75 (s, 3H).

**<sup>13</sup>C NMR** (101 MHz, Chloroform-*d*)  $\delta$  189.9, 166.4 (d, *J* = 256.8 Hz), 154.4, 153.3, 134.0, 132.7 (d, *J* = 9.6 Hz), 132.2, 132.0, 131.6 (d, *J* = 2.0 Hz), 131.1, 124.1, 115.9 (d, *J* = 22.4 Hz), 113.9, 29.0.

**<sup>19</sup>F NMR** (565 MHz, Chloroform-*d*)  $\delta$  -102.84.

**1-methyl-3-(4-methylbenzoyl)quinoxalin-2(1H)-one (36)<sup>20</sup>**

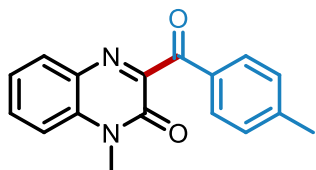

Follow the general procedure C. **36** was purified by flash chromatography (silica gel,

petroleum ether/ethyl acetate from 5:1 to 2:1, v/v) to give the desired product: colorless oil (41.2 mg, 74%).

**<sup>1</sup>H NMR** (600 MHz, Chloroform-*d*) δ 7.94 – 7.92 (m, 1H), 7.90 – 7.87 (m, 2H), 7.70 – 7.65 (m, 1H), 7.43 – 7.39 (m, 2H), 7.30 – 7.26 (m, 2H), 3.75 (s, 3H), 2.43 (s, 3H).

**<sup>13</sup>C NMR** (151 MHz, Chloroform-*d*) δ 191.4, 154.9, 153.4, 145.4, 133.9, 132.4, 132.2, 131.9, 131.0, 130.1, 129.4, 124.2, 113.9, 29.1, 21.9.

**1-methyl-3-(3-phenylpropanoyl)quinoxalin-2(1H)-one (37)**<sup>21</sup>

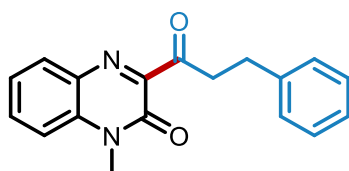

Follow the general procedure C. **37** was purified by flash chromatography (silica gel, petroleum ether/ethyl acetate from 5:1 to 2:1, v/v) to give the desired product: colorless oil (47.3 mg, 81%).

**<sup>1</sup>H NMR** (400 MHz, Chloroform-*d*) δ 7.94 – 7.90 (m, 1H), 7.69 – 7.64 (m, 1H), 7.42 – 7.35 (m, 2H), 7.29 – 7.25 (m, 4H), 7.19 – 7.17 (m, 1H), 3.71 (s, 3H), 3.46 – 3.40 (m, 2H), 3.13 – 3.06 (m, 2H).

**<sup>13</sup>C NMR** (101 MHz, Chloroform-*d*) δ 199.4, 140.9, 134.4, 132.5, 132.1, 131.4, 128.4, 128.2, 126.0, 124.0, 113.7, 42.3, 29.6, 28.9.

**2-(6-bromobenzo[d]thiazol-2-yl)propan-2-ol (38)**<sup>15</sup>

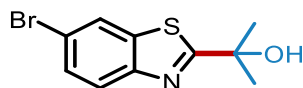

Follow the general procedure B. **38** was purified by flash chromatography (silica gel, petroleum ether/ethyl acetate from 20:1 to 5:1, v/v) to give the desired product: colorless oil (49.9 mg, 92%).

**<sup>1</sup>H NMR** (600 MHz, Chloroform-*d*) δ 8.01 – 7.98 (m, 1H), 7.81 (d, *J* = 8.7 Hz, 1H), 7.58 – 7.54 (m, 1H), 3.19 (s, 1H), 1.74 (s, 6H).

**<sup>13</sup>C NMR** (151 MHz, Chloroform-*d*) δ 180.8, 152.1, 137.0, 129.5, 124.3, 124.0, 118.4, 73.7, 30.7.

**2-(5-bromobenzo[d]thiazol-2-yl)propan-2-ol (39)**<sup>15</sup>

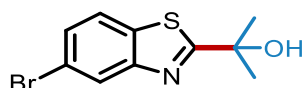

Follow the general procedure B. **39** was purified by flash chromatography (silica gel, petroleum ether/ethyl acetate from 20:1 to 5:1, v/v) to give the desired product: colorless oil (50.9 mg, 94%).

**<sup>1</sup>H NMR** (600 MHz, Chloroform-*d*) δ 8.06 – 8.04 (m, 1H), 7.66 – 7.63 (m, 1H), 7.41 – 7.38 (m, 1H), 3.05 (s, 1H), 1.67 (s, 6H).

**<sup>13</sup>C NMR** (151 MHz, Chloroform-*d*) δ 181.9, 154.4, 134.2, 128.0, 125.9, 122.8, 119.6, 73.7,

30.7.

**2-(5-chlorobenzo[d]thiazol-2-yl)propan-2-ol (40)<sup>15</sup>**

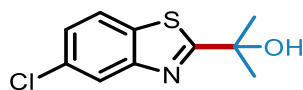

Follow the general procedure B. **40** was purified by flash chromatography (silica gel, petroleum ether/ethyl acetate from 20:1 to 5:1, v/v) to give the desired product: colorless oil (38.6 mg, 85%).

**<sup>1</sup>H NMR** (600 MHz, Chloroform-*d*)  $\delta$  7.98 – 7.96 (m, 1H), 7.80 – 7.78 (m, 1H), 7.36 – 7.34 (m, 1H), 2.95 (s, 1H), 1.74 (s, 6H).

**<sup>13</sup>C NMR** (151 MHz, Chloroform-*d*)  $\delta$  182.0, 154.1, 133.7, 132.0, 125.4, 122.8, 122.5, 73.7, 30.7.

**2-(6-methoxybenzo[d]thiazol-2-yl)propan-2-ol (41)<sup>15</sup>**

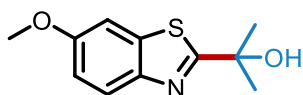

Follow the general procedure B. **41** was purified by flash chromatography (silica gel, petroleum ether/ethyl acetate from 20:1 to 5:1, v/v) to give the desired product: colorless oil (40.6 mg, 91%).

**<sup>1</sup>H NMR** (600 MHz, Chloroform-*d*)  $\delta$  7.87 – 7.83 (m, 1H), 7.34 – 7.31 (m, 1H), 7.08 – 7.04 (m, 1H), 3.87 (s, 3H), 3.21 (s, 1H), 1.73 (s, 6H).

**<sup>13</sup>C NMR** (151 MHz, Chloroform-*d*)  $\delta$  177.3, 157.5, 147.5, 136.7, 123.3, 115.3, 104.3, 73.4, 55.8, 30.8.

**2-(benzo[d]oxazol-2-yl)propan-2-ol (42)<sup>22</sup>**

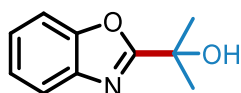

Follow the general procedure B. **42** was purified by flash chromatography (silica gel, petroleum ether/ethyl acetate from 20:1 to 5:1, v/v) to give the desired product: colorless oil (28.7 mg, 81%).

**<sup>1</sup>H NMR** (400 MHz, Chloroform-*d*)  $\delta$  7.78 – 7.73 (m, 1H), 7.55 – 7.50 (m, 1H), 7.38 – 7.32 (m, 2H), 3.38 (s, 1H), 1.75 (s, 6H).

**<sup>13</sup>C NMR** (101 MHz, Chloroform-*d*)  $\delta$  170.8, 151.1, 140.6, 125.1, 124.5, 120.1, 110.7, 69.8, 28.6.

**Ethyl-(2-hydroxypropan-2-yl)benzo[d]oxazole-6-carboxylate (43)**

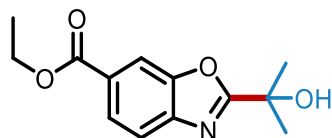

Follow the general procedure B. **43** was purified by flash chromatography (silica gel, petroleum ether/ethyl acetate from 20:1 to 5:1, v/v) to give the desired product: colorless

oil (40.4 mg, 81%).

**<sup>1</sup>H NMR** (400 MHz, Chloroform-*d*) δ 8.43 – 8.37 (m, 1H), 8.11 – 8.04 (m, 1H), 7.57 – 7.49 (m, 1H), 4.44 – 4.35 (m, 2H), 3.55 (s, 1H), 1.75 (s, 6H), 1.44 – 1.37 (m, 3H).

**<sup>13</sup>C NMR** (101 MHz, Chloroform-*d*) δ 171.9, 166.0, 153.8, 140.8, 127.5, 127.0, 122.1, 110.4, 69.8, 61.1, 28.5, 14.2.

**HRMS** (ESI-TOF): *m/z*: [M + H]<sup>+</sup> Calcd for C<sub>13</sub>H<sub>16</sub>NO<sub>4</sub><sup>+</sup> 250.1074; Found 250.1075.

#### 2-(4,5-dimethylthiazol-2-yl)propan-2-ol (**44**)

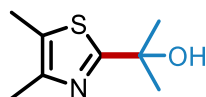

Follow the general procedure B. **44** was purified by flash chromatography (silica gel, petroleum ether/ethyl acetate from 20:1 to 5:1, v/v) to give the desired product: colorless oil (31.5 mg, 92%).

**<sup>1</sup>H NMR** (400 MHz, Chloroform-*d*) δ 3.33 (s, 1H), 2.29 (d, *J* = 11.5 Hz, 6H), 1.61 (s, 6H).

**<sup>13</sup>C NMR** (101 MHz, Chloroform-*d*) δ 173.9, 147.2, 125.9, 72.6, 31.0, 14.5, 11.1.

**HRMS** (ESI-TOF): *m/z*: [M + K]<sup>+</sup> Calcd for C<sub>8</sub>H<sub>13</sub>NOSK<sup>+</sup> 210.0349; Found 210.0360.

#### 2-(2-methylquinolin-4-yl)propan-2-ol (**45**)

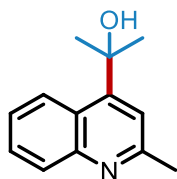

Follow the general procedure B, the isopropanol was mixed with the DMSO for the ratio of 1:1, and the TFA was employed for 0.3 mmol. **45** was purified by flash chromatography (silica gel, petroleum ether/ethyl acetate from 20:1 to 1:1, v/v) to give the desired product: colorless oil (26.1 mg, 65%).

**<sup>1</sup>H NMR** (600 MHz, DMSO-*d*<sub>6</sub>) δ 8.08 – 8.03 (m, 1H), 7.83 – 7.80 (m, 1H), 7.69 – 7.65 (m, 1H), 7.48 – 7.43 (m, 1H), 6.94 (s, 1H), 4.97 – 4.92 (m, 1H), 2.59 (s, 3H), 1.41 (d, *J* = 6.0 Hz, 6H).

**<sup>13</sup>C NMR** (151 MHz, DMSO-*d*<sub>6</sub>) δ 160.3, 160.1, 130.0, 128.3, 125.0, 122.0, 120.3, 102.7, 70.8, 25.8, 22.0.

**HRMS** (ESI-TOF): *m/z*: [M + H]<sup>+</sup> Calcd for C<sub>13</sub>H<sub>16</sub>NO<sup>+</sup> 202.1226; Found 202.1236.

#### 4-(2-hydroxypropan-2-yl)quinoline-2-carbonitrile (**46**)

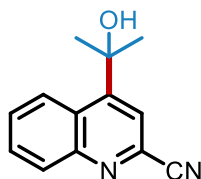

Follow the general procedure B, the isopropanol was mixed with the DMSO for the ratio of 1:1, and the TFA was employed for 0.3 mmol. **46** was purified by flash chromatography (silica gel, petroleum ether/ethyl acetate from 20:1 to 1:1, v/v) to give the desired product:



colorless oil (32.6 mg, 77%).

**<sup>1</sup>H NMR** (600 MHz, Methanol-*d*<sub>4</sub>) δ 8.28 – 8.24 (m, 1H), 8.02 – 7.97 (m, 1H), 7.86 – 7.82 (m, 1H), 7.69 – 7.66 (m, 1H), 7.39 (s, 1H), 5.07 – 5.01 (m, 1H), 1.51 (d, *J* = 6.1 Hz, 6H).

**<sup>13</sup>C NMR** (151 MHz, Methanol-*d*<sub>4</sub>) δ 162.0, 148.8, 134.4, 131.2, 128.3, 128.0, 122.4, 121.9, 117.2, 104.3, 72.4, 20.4.

**HRMS** (ESI-TOF): *m/z*: [M + H]<sup>+</sup> Calcd for C<sub>13</sub>H<sub>13</sub>N<sub>2</sub>O<sup>+</sup> 213.1022; Found 213.1027.

#### Methyl 4-(2-hydroxypropan-2-yl)quinoline-2-carboxylate (**47**)

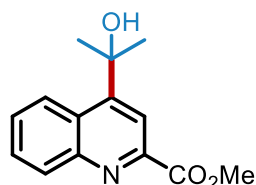

Follow the general procedure B. the isopropanol was mixed with the DMSO for the ratio of 1:1, and the TFA was employed for 0.3 mmol. **47** was purified by flash chromatography (silica gel, petroleum ether/ethyl acetate from 20:1 to 1:1, v/v) to give the desired product: colorless oil (32.8 mg, 67%).

**<sup>1</sup>H NMR** (600 MHz, DMSO-*d*<sub>6</sub>) δ 8.21 – 8.18 (m, 1H), 8.10 – 8.06 (m, 1H), 7.86 – 7.83 (m, 1H), 7.70 – 7.67 (m, 1H), 7.54 (s, 1H), 5.10 – 5.05 (m, 1H), 3.96 (s, 3H), 1.45 (d, *J* = 6.0 Hz, 6H).

**<sup>13</sup>C NMR** (151 MHz, DMSO-*d*<sub>6</sub>) δ 166.1, 161.3, 149.4, 148.5, 131.2, 130.0, 128.1, 122.5, 122.2, 101.7, 71.7, 53.1, 21.9.

**HRMS** (ESI-TOF): *m/z*: [M + H]<sup>+</sup> Calcd for C<sub>14</sub>H<sub>16</sub>NO<sub>3</sub><sup>+</sup> 246.1125; Found 246.1135.

#### 2-(3-methylbenzo[f]quinolin-1-yl)propan-2-ol (**48**)

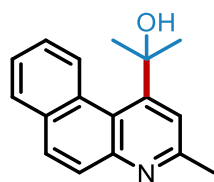

Follow the general procedure B. the isopropanol was mixed with the DMSO for the ratio of 1:1, and the TFA was employed for 0.3 mmol. **48** was purified by flash chromatography (silica gel, petroleum ether/ethyl acetate from 20:1 to 1:1, v/v) to give the desired product: colorless oil (35.6 mg, 71%).

**<sup>1</sup>H NMR** (600 MHz, DMSO-*d*<sub>6</sub>) δ 9.56 – 9.52 (m, 1H), 8.04 – 8.00 (m, 2H), 7.80 – 7.77 (m, 1H), 7.70 – 7.67 (m, 1H), 7.65 – 7.61 (m, 1H), 7.23 (s, 1H), 5.15 – 5.10 (m, 1H), 2.64 (s, 3H), 1.54 (d, *J* = 6.0 Hz, 6H).

**<sup>13</sup>C NMR** (151 MHz, DMSO-*d*<sub>6</sub>) δ 163.1, 159.1, 150.3, 131.8, 131.6, 129.7, 128.9, 128.4, 128.2, 127.5, 126.5, 114.7, 105.6, 71.6, 25.1, 22.3.

**HRMS** (ESI-TOF): *m/z*: [M + H]<sup>+</sup> Calcd for C<sub>17</sub>H<sub>18</sub>NO<sup>+</sup> 252.1383; Found 252.1399.

#### (3aR,5aS,8S,9aS,9bR)-8-(benzo[d]thiazol-2-yl)-3a,6,6,9a-tetramethyldecahydronaphtho[2,1-b]furan-2(1H)-one (**49**)<sup>23</sup>

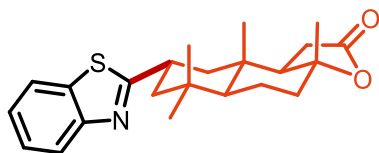

Follow the general procedure A. **49** was purified by flash chromatography (silica gel, petroleum ether/ethyl acetate from 20:1 to 5:1, v/v) to give the desired product: colorless oil (46.0 mg, 60 %).

**<sup>1</sup>H NMR** (600 MHz, Chloroform-*d*)  $\delta$  8.00 – 7.96 (m, 1H), 7.88 – 7.85 (m, 1H), 7.49 – 7.44 (m, 1H), 7.39 – 7.34 (m, 1H), 3.61 – 3.54 (m, 1H), 2.45 (dd, *J* = 16.3, 14.7 Hz, 1H), 2.29 (dd, *J* = 16.2, 6.5 Hz, 1H), 2.14 (dt, *J* = 12.0, 3.3 Hz, 1H), 2.08 (dd, *J* = 14.7, 6.5 Hz, 1H), 2.01 – 1.94 (m, 3H), 1.75 (td, *J* = 12.5, 4.2 Hz, 1H), 1.64 (d, *J* = 12.9 Hz, 1H), 1.50 – 1.44 (m, 2H), 1.38 (s, 3H), 1.28 – 1.25 (m, 2H), 1.08 (s, 3H), 1.02 (s, 3H), 1.00 (s, 3H).

**<sup>13</sup>C NMR** (151 MHz, Chloroform-*d*)  $\delta$  176.4, 176.3, 153.0, 134.3, 126.1, 124.8, 122.6, 121.6, 86.0, 58.8, 56.2, 48.6, 46.0, 38.6, 36.9, 35.7, 34.1, 33.0, 28.7, 21.7, 21.4, 20.4, 15.8.

**3-(1-(4'-(difluoro(3,4,5-trifluorophenoxy)methyl)-3',5'-difluoro-[1,1'-biphenyl]-4-yl)ethyl)-1-methylquinoxalin-2(1H)-one (50)**

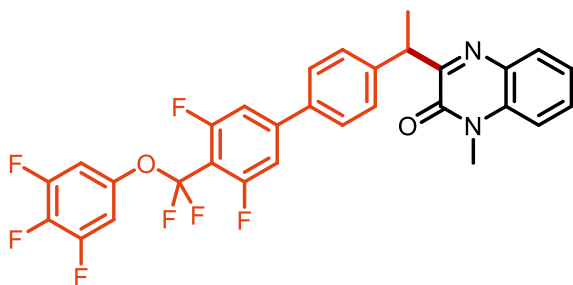

Follow the general procedure C. **50** was purified by flash chromatography (silica gel, petroleum ether/ethyl acetate from 10:1 to 5:1, v/v) to give the desired product: light yellow oil (83.5 mg, 73%).

**<sup>1</sup>H NMR** (600 MHz, Chloroform-*d*)  $\delta$  7.96 – 7.93 (m, 1H), 7.57 – 7.52 (m, 3H), 7.49 – 7.46 (m, 2H), 7.40 – 7.35 (m, 1H), 7.31 – 7.27 (m, 1H), 7.19 – 7.14 (m, 2H), 7.00 – 6.95 (m, 2H), 4.90 – 4.84 (m, 1H), 3.65 (s, 3H), 1.74 – 1.70 (m, 3H).

**<sup>13</sup>C NMR** (151 MHz, Chloroform-*d*)  $\delta$  161.3, 161.1 – 160.9 (m), 159.6 – 159.1 (m), 154.4, 151.8 (dd, *J* = 10.4, 5.4 Hz), 150.2 (dd, *J* = 10.4, 4.8 Hz), 146.9 (t, *J* = 10.3 Hz), 144.8, 135.6, 132.9 (d, *J* = 58.1 Hz), 130.1 (d, *J* = 36.8 Hz), 129.0, 127.0, 123.6, 113.6, 110.8 (dd, *J* = 23.1, 3.5 Hz), 110.77 (q, *J* = 23.1, 3.5 Hz), 41.7, 29.1, 19.6.

**<sup>19</sup>F NMR** (565 MHz, Chloroform-*d*)  $\delta$  -61.65, -110.60, -132.56, -163.28.

**HRMS** (ESI-TOF): *m/z*: [M + H]<sup>+</sup> Calcd for C<sub>30</sub>H<sub>20</sub>F<sub>7</sub>N<sub>2</sub>O<sub>2</sub><sup>+</sup> 573.4108; Found 573.1410.

**3-(2-hydroxybenzoyl)-1-methylquinoxalin-2(1H)-one (51)**

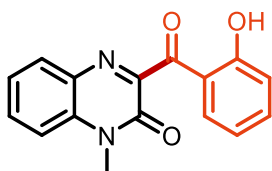

Follow the general procedure C. **51** was purified by flash chromatography (silica gel, petroleum ether/ethyl acetate from 5:1 to 2:1, v/v) to give the desired product: colorless oil (39.2 mg, 70%).

**<sup>1</sup>H NMR** (600 MHz, Chloroform-*d*)  $\delta$  11.68 (s, 1H), 7.96 – 7.93 (m, 1H), 7.73 – 7.69 (m, 1H), 7.57 – 7.52 (m, 1H), 7.52 – 7.48 (m, 1H), 7.46 – 7.41 (m, 2H), 7.09 – 7.06 (m, 1H), 6.89 – 6.84 (m, 1H), 3.78 (s, 3H).

**<sup>13</sup>C NMR** (151 MHz, Chloroform-*d*)  $\delta$  196.5, 163.6, 153.1, 153.0, 137.6, 133.9, 132.7, 132.4, 132.1, 131.1, 124.4, 119.2, 118.6, 118.5, 114.0, 29.2.

**HRMS** (ESI-TOF): *m/z*: [M + Na]<sup>+</sup> Calcd for C<sub>16</sub>H<sub>12</sub>N<sub>2</sub>O<sub>3</sub>Na<sup>+</sup> 303.0740; Found 303.0743.

**1-methyl-3-(4-(4-methylpent-3-en-1-yl)cyclohex-3-ene-1-carbonyl)quinoxalin-2(1H)-one (52)**

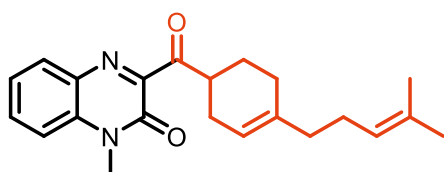

Follow the general procedure D. **52** was purified by flash chromatography (silica gel, petroleum ether/ethyl acetate from 20:1 to 1:1, v/v) to give the desired product: colorless oil (46.2 mg, 66%).

**<sup>1</sup>H NMR** (600 MHz, Chloroform-*d*)  $\delta$  7.95 – 7.92 (m, 1H), 7.66 (dt, *J* = 8.7, 4.6 Hz, 1H), 7.43 – 7.39 (m, 1H), 7.38 – 7.35 (m, 1H), 5.46 – 5.43 (m, 1H), 5.12 – 5.08 (m, 1H), 3.73 (s, 3H), 3.62 – 3.52 (m, 1H), 2.46 – 2.23 (m, 2H), 2.16 – 2.04 (m, 5H), 2.00 – 1.95 (m, 2H), 1.69 – 1.67 (m, 3H), 1.66 – 1.61 (m, 1H), 1.61 – 1.59 (m, 3H).

**<sup>13</sup>C NMR** (151 MHz, Chloroform-*d*)  $\delta$  203.64, 153.83, 153.03, 137.51, 136.19, 134.11, 132.24, 132.11, 131.50, 131.24, 124.24, 124.21, 124.11, 120.30, 118.92, 113.86, 44.63, 44.23, 37.78, 37.58, 29.43, 29.01, 27.86, 26.58, 26.43, 25.72, 24.76, 24.52, 24.25, 17.71.

**3-(3-(benzo[d][1,3]dioxol-5-yl)-2-methylpropanoyl)-1-methylquinoxalin-2(1H)-one (53)**

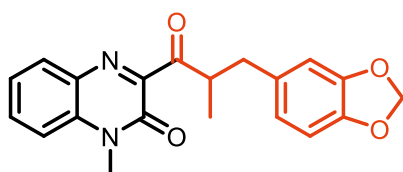

Follow the general procedure D. **53** was purified by flash chromatography (silica gel, petroleum ether/ethyl acetate from 20:1 to 1:1, v/v) to give the desired product: colorless oil (51.1 mg, 73%).

**<sup>1</sup>H NMR** (600 MHz, Chloroform-*d*)  $\delta$  7.93 – 7.90 (m, 1H), 7.68 – 7.64 (m, 1H), 7.42 – 7.38 (m, 1H), 7.35 – 7.32 (m, 1H), 6.72 (s, 1H), 6.66 (s, 2H), 5.88 – 5.80 (m, 2H), 3.90 – 3.83 (m, 1H), 3.70 (s, 3H), 3.12 – 3.07 (m, 1H), 2.67 – 2.62 (m, 1H), 1.23 – 1.17 (m, 3H).

**<sup>13</sup>C NMR** (151 MHz, Chloroform-*d*)  $\delta$  203.29, 152.97, 152.90, 147.45, 145.82, 134.21,

133.23, 132.37, 132.00, 131.31, 124.05, 122.24, 113.78, 109.58, 107.94, 100.73, 45.31, 38.25, 28.98, 15.22.

**8-(2-hydroxypropan-2-yl)-1,3,7-trimethyl-3,7-dihydro-1H-purine-2,6-dione (54)<sup>24</sup>**

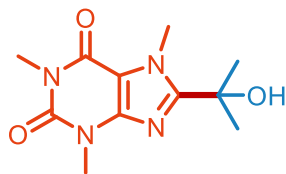

Follow the general procedure B. **54** was purified by flash chromatography (silica gel, petroleum ether/ethyl acetate from 10:1 to 1:2, v/v) to give the desired product: colorless oil (35.8 mg, 71%).

**<sup>1</sup>H NMR** (400 MHz, Chloroform-*d*)  $\delta$  4.16 (s, 3H), 3.51 (s, 3H), 3.37 (s, 3H), 2.97 (s, 1H), 1.69 (s, 6H).

**<sup>13</sup>C NMR** (101 MHz, Chloroform-*d*)  $\delta$  156.9, 155.5, 151.7, 146.7, 108.5, 70.8, 33.9, 29.5, 29.4, 27.8.

**7-((1,3-dioxolan-2-yl)methyl)-8-(2-hydroxypropan-2-yl)-1,3-dimethyl-3,7-dihydro-1H-purine-2,6-dione (55)**

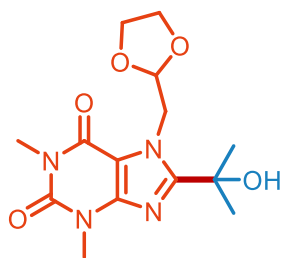

Follow the general procedure B. **55** was purified by flash chromatography (silica gel, petroleum ether/ethyl acetate from 10:1 to 1:2, v/v) to give the desired product: colorless oil (51.7 mg, 80%).

**<sup>1</sup>H NMR** (400 MHz, Chloroform-*d*)  $\delta$  5.29 – 5.24 (m, 1H), 5.09 – 5.03 (m, 2H), 3.91 (t, *J* = 1.0 Hz, 4H), 3.56 (s, 3H), 3.40 (s, 3H), 1.67 (s, 6H).

**<sup>13</sup>C NMR** (101 MHz, Chloroform-*d*)  $\delta$  208.4, 157.0, 155.3, 151.4, 146.8, 108.5, 70.8, 43.1, 40.7, 33.9, 33.8, 29.7, 29.4, 27.5, 21.0.

**HRMS** (ESI-TOF): *m/z*: [M + K]<sup>+</sup> Calcd for C<sub>14</sub>H<sub>20</sub>N<sub>4</sub>O<sub>5</sub>K<sup>+</sup> 363.1065; Found 363.1067.

**8-(2-hydroxypropan-2-yl)-3,7-dimethyl-1-(5-oxohexyl)-3,7-dihydro-1H-purine-2,6-dione (56)<sup>24</sup>**

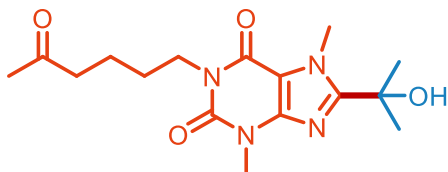

Follow the general procedure B. **56** was purified by flash chromatography (silica gel, petroleum ether/ethyl acetate from 20:1 to 5:1, v/v) to give the desired product: colorless oil (51.8 mg, 77%).

**<sup>1</sup>H NMR** (400 MHz, Chloroform-*d*)  $\delta$  4.13 (s, 3H), 3.99 – 3.92 (m, 2H), 3.48 (s, 3H), 3.13 (s, 1H), 2.46 (t, *J* = 6.9 Hz, 2H), 2.11 (s, 3H), 1.66 (s, 6H), 1.64 – 1.57 (m, 4H).

**<sup>13</sup>C NMR** (101 MHz, Chloroform-*d*)  $\delta$  158.3, 155.3, 151.7, 147.4, 107.7, 102.0, 72.4, 65.1, 47.9, 31.1, 29.5, 27.8.

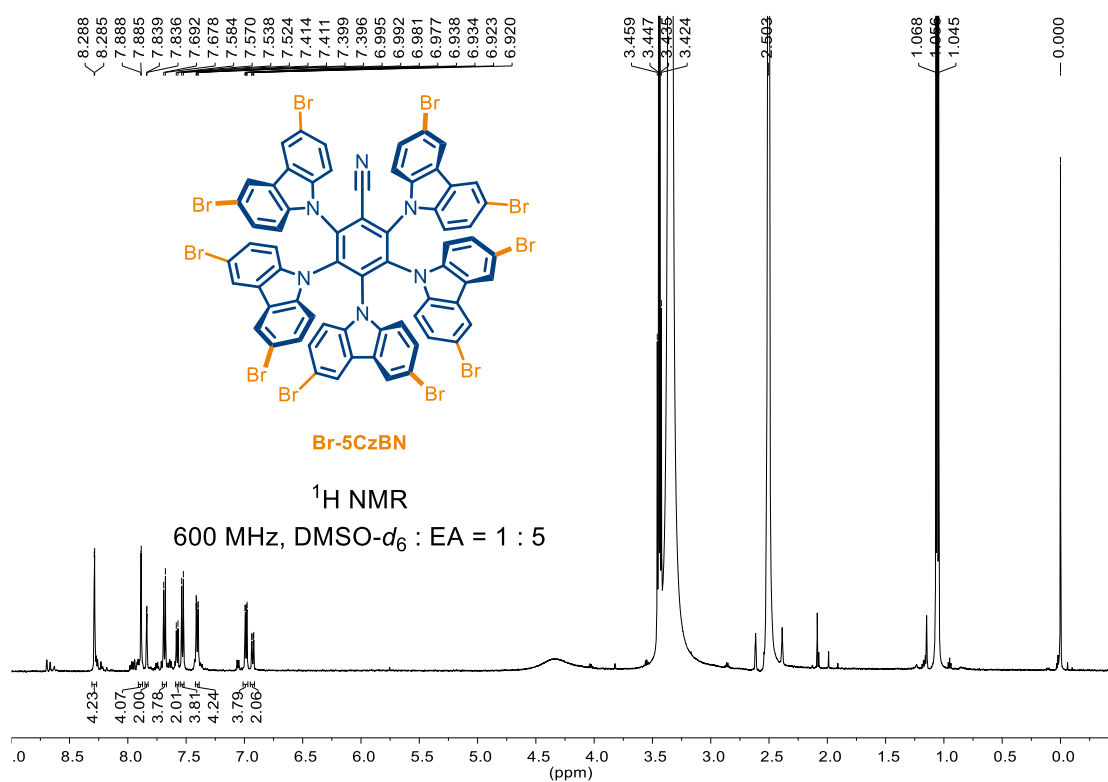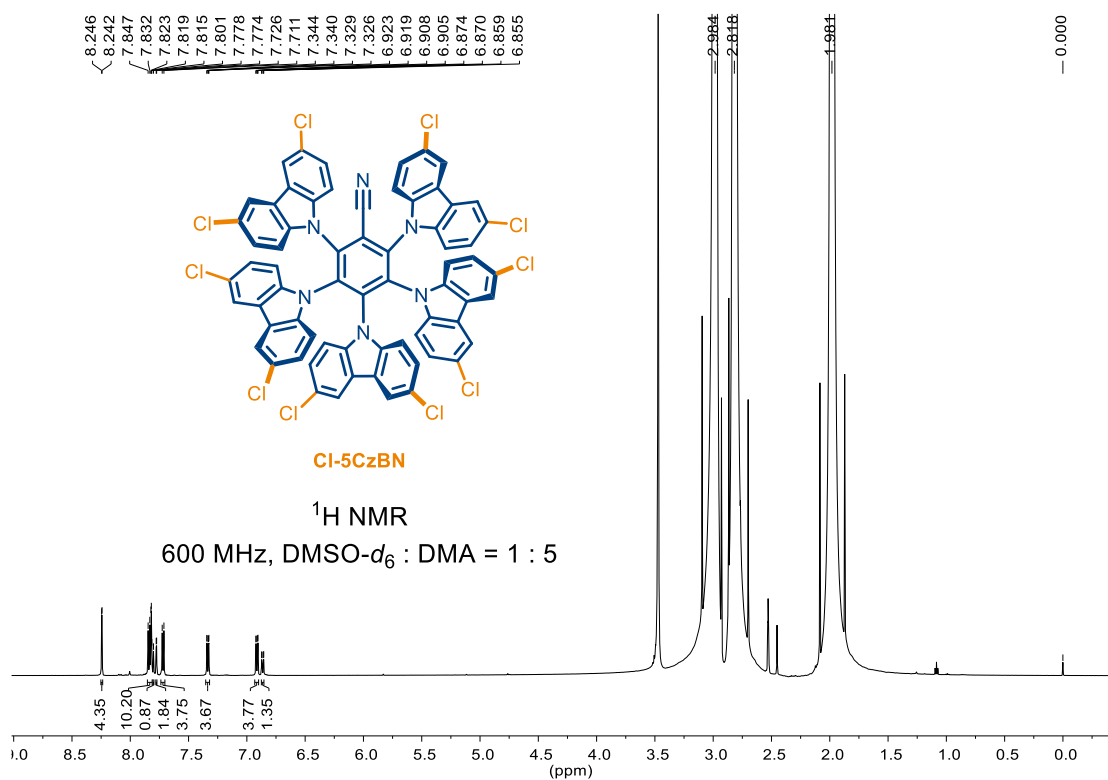

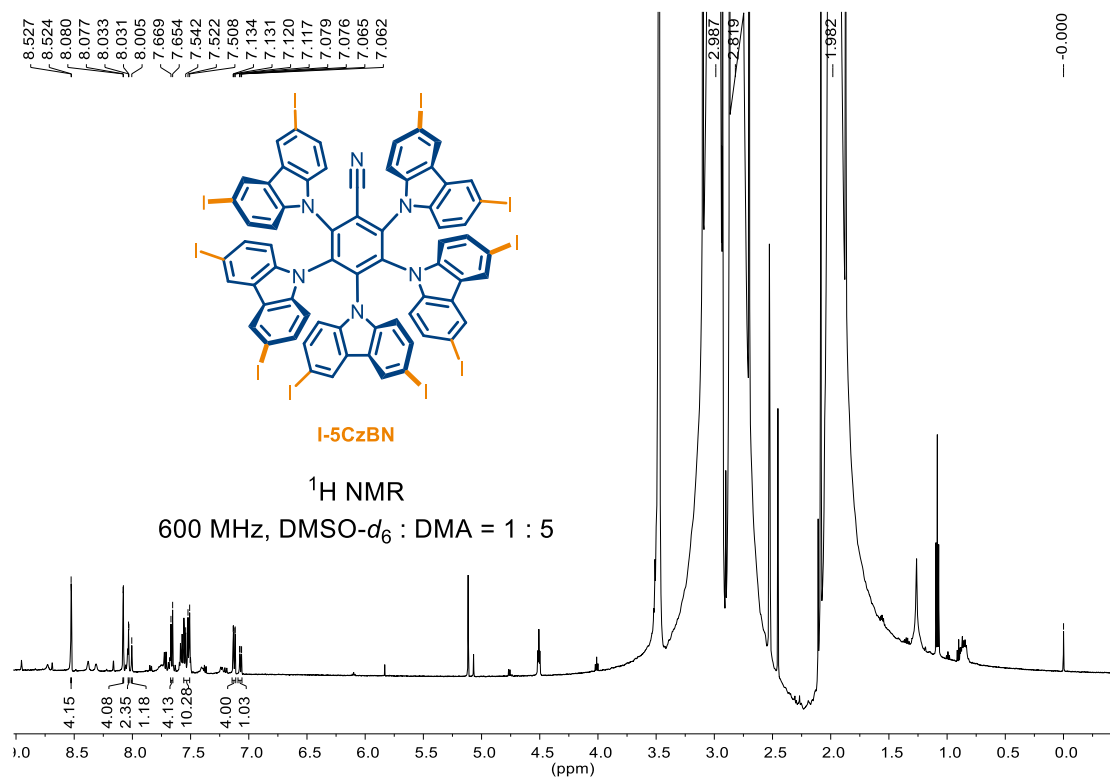

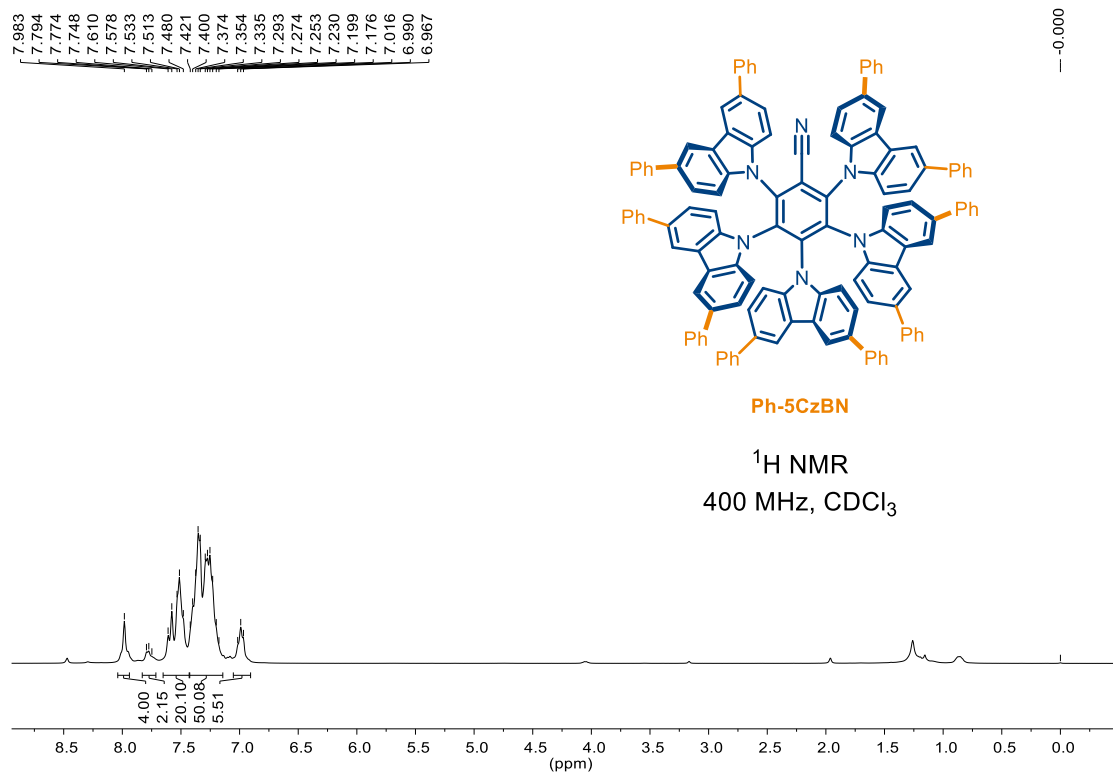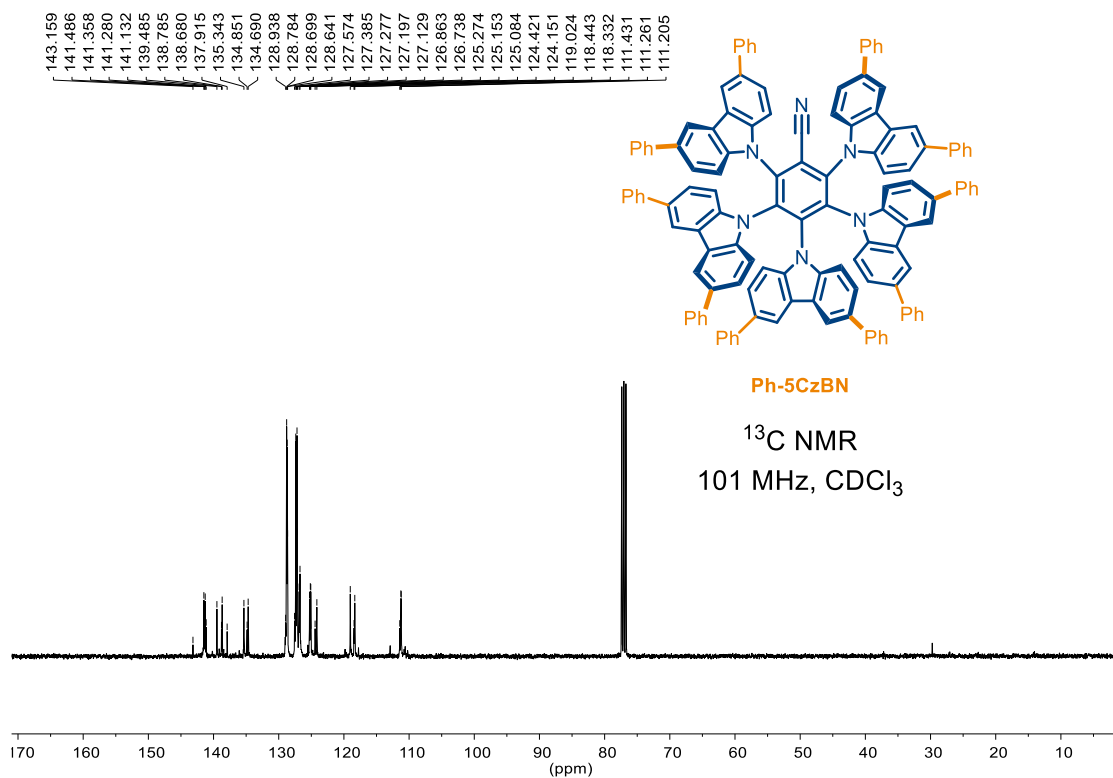



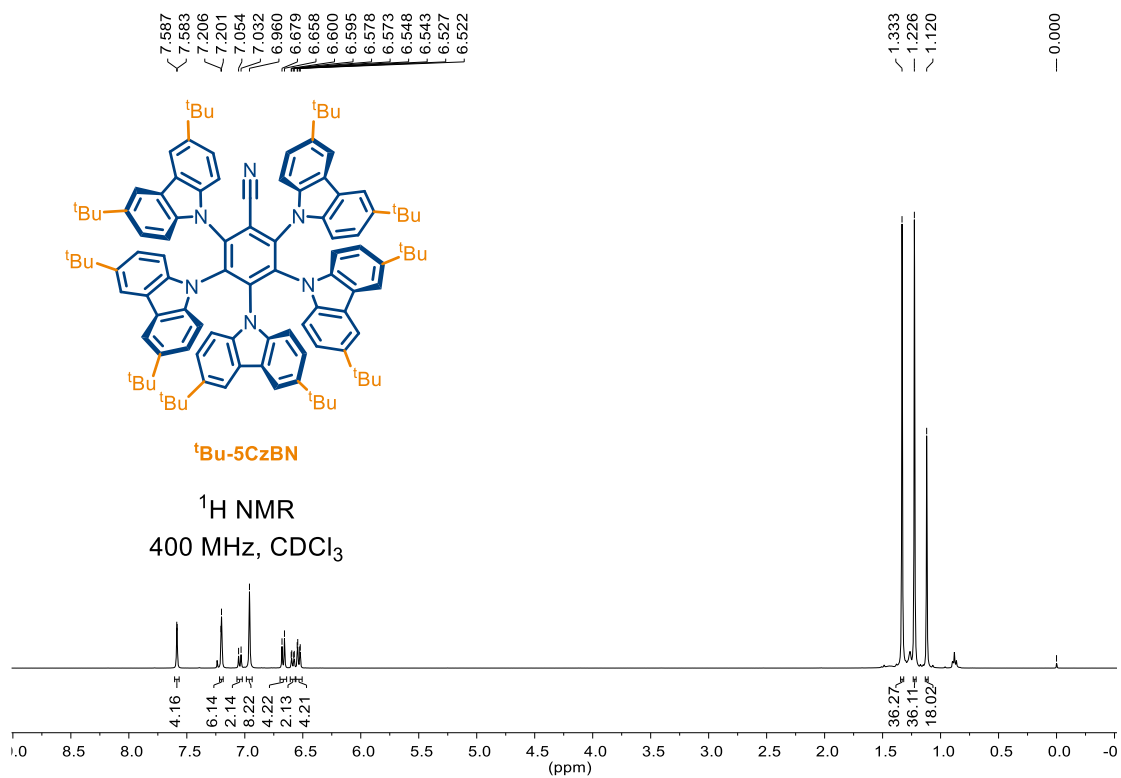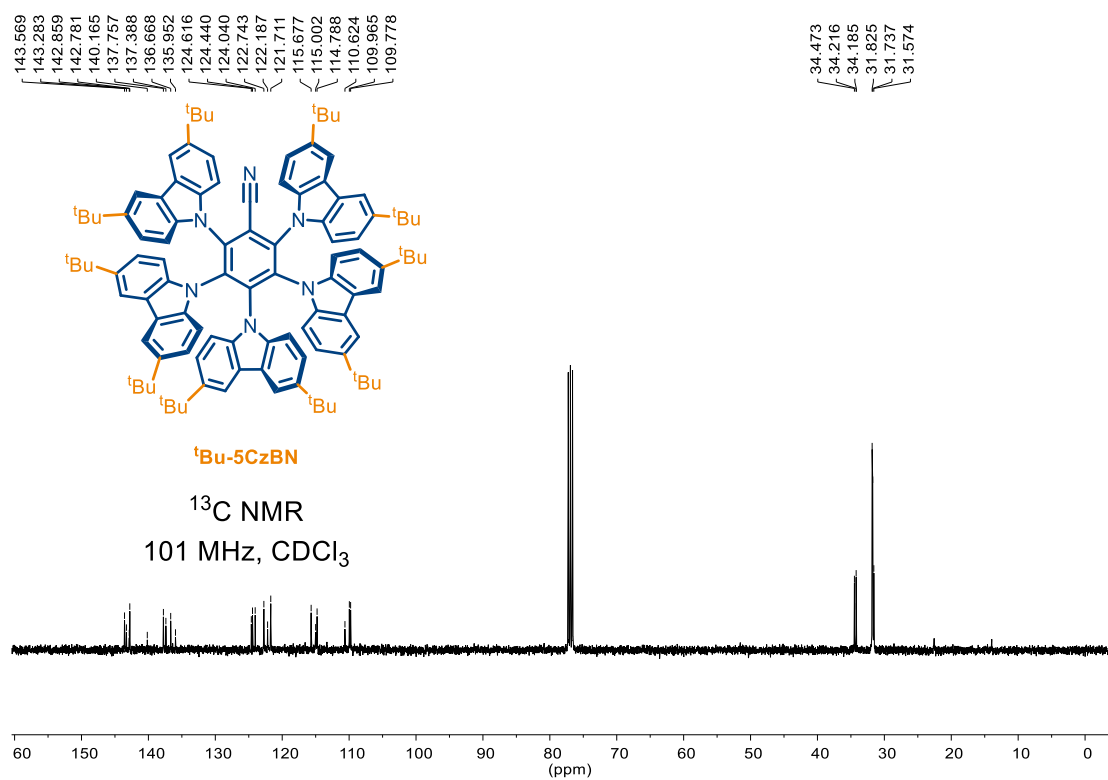

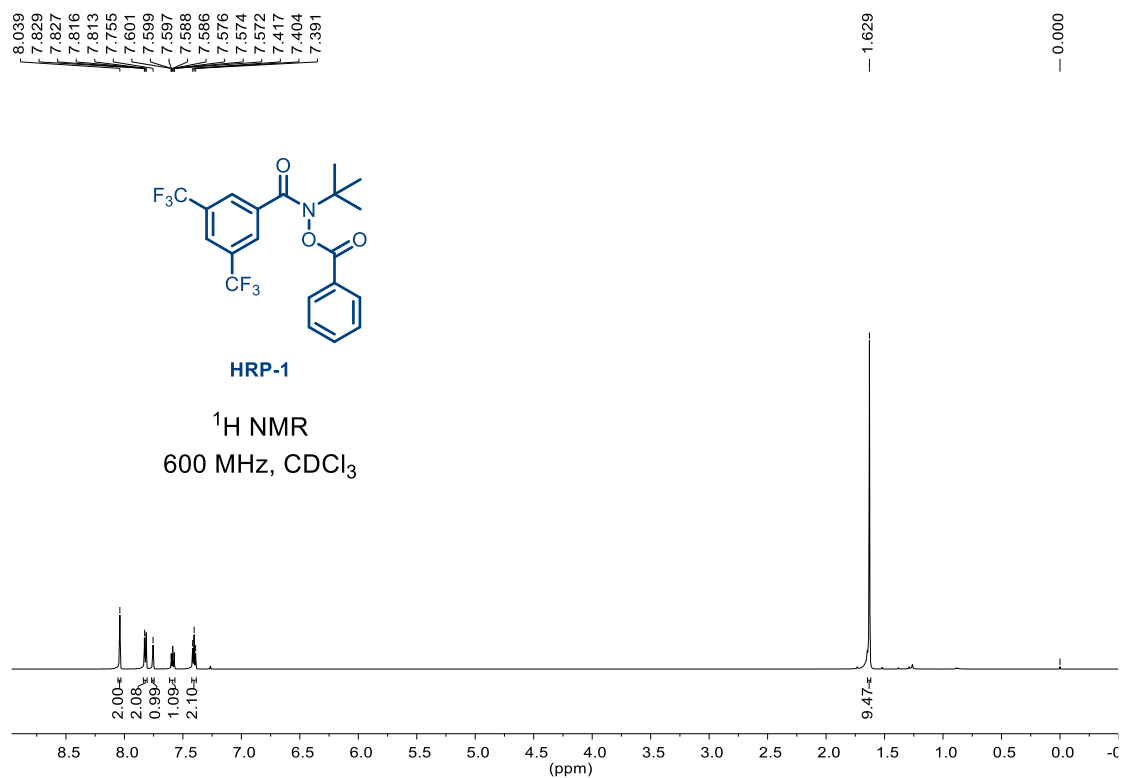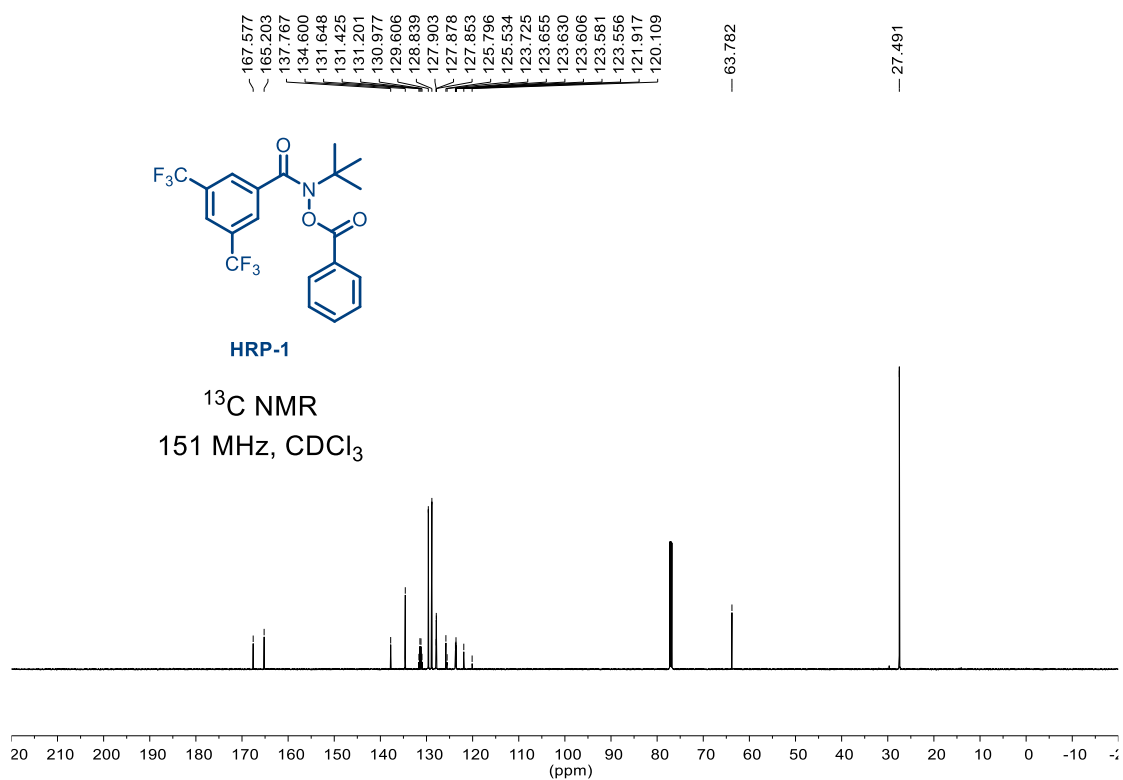

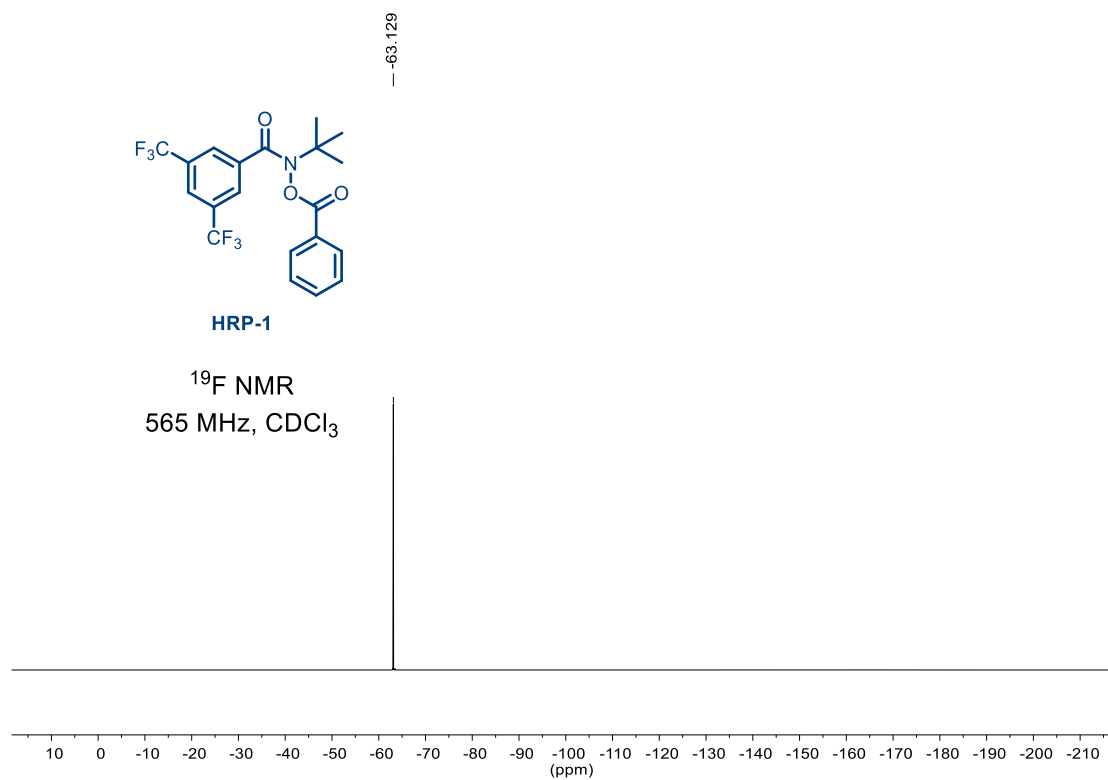

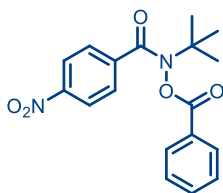 $^1\text{H}$  NMR  
600 MHz,  $\text{CDCl}_3$ 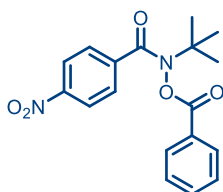

<sup>13</sup>C NMR  
151 MHz, CDCl<sub>3</sub>

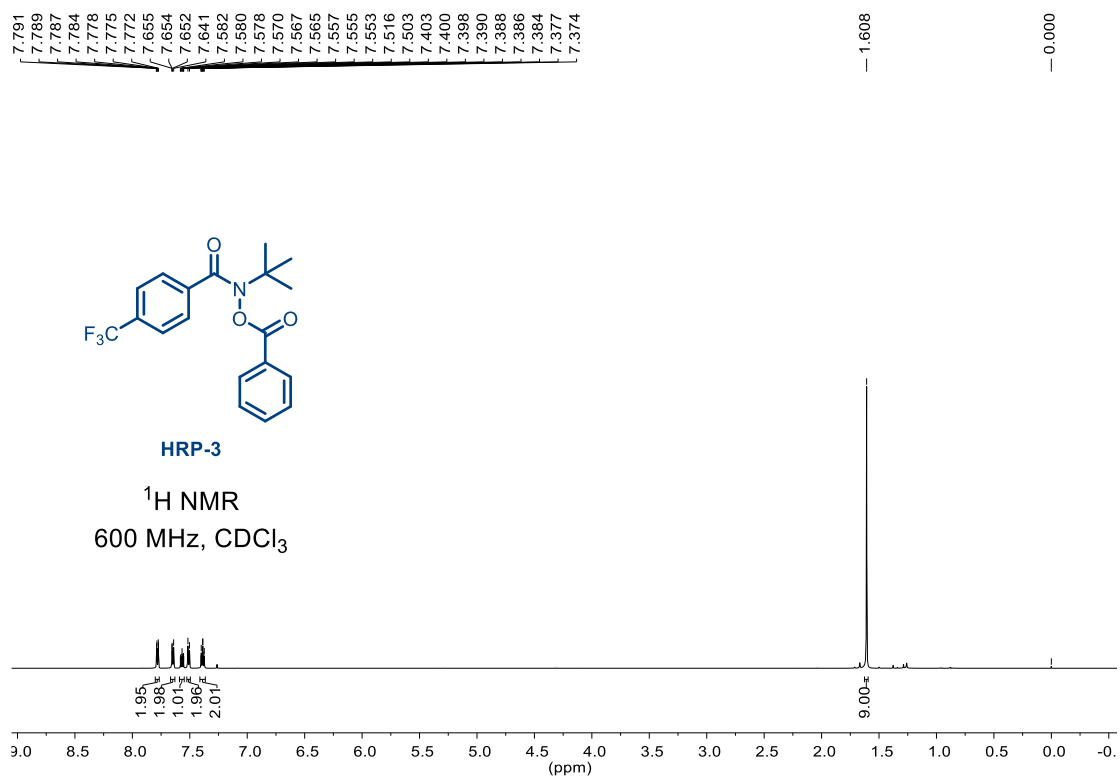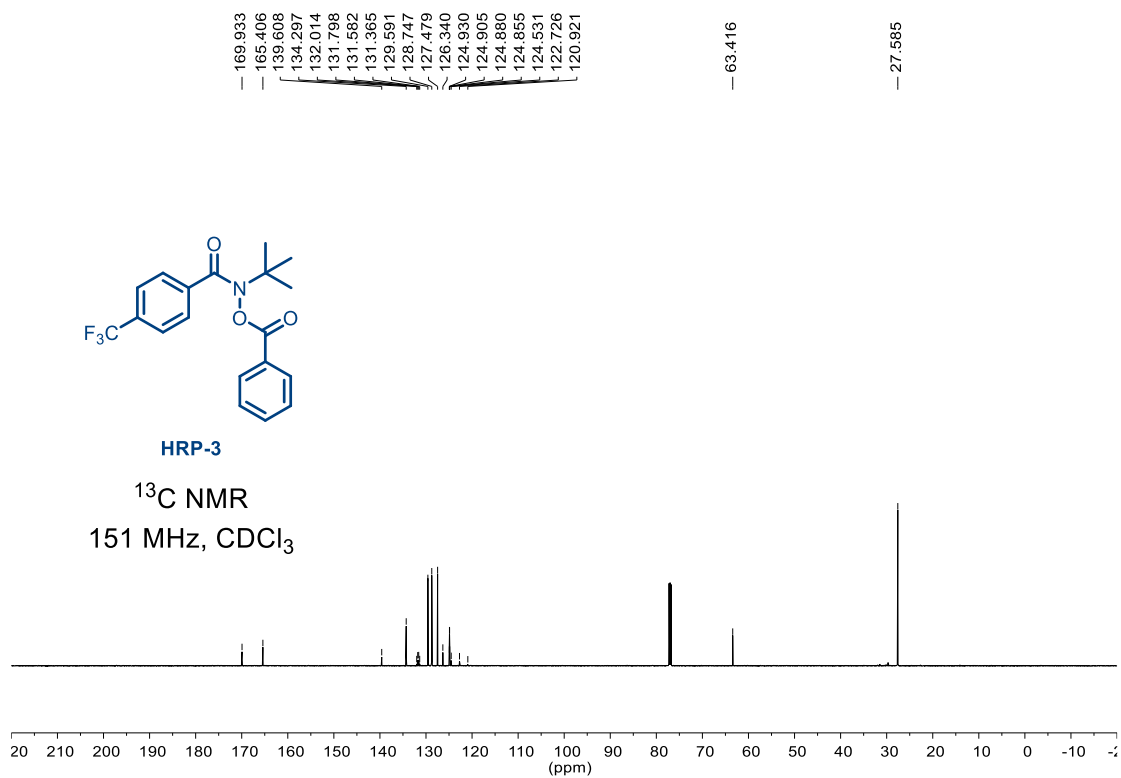

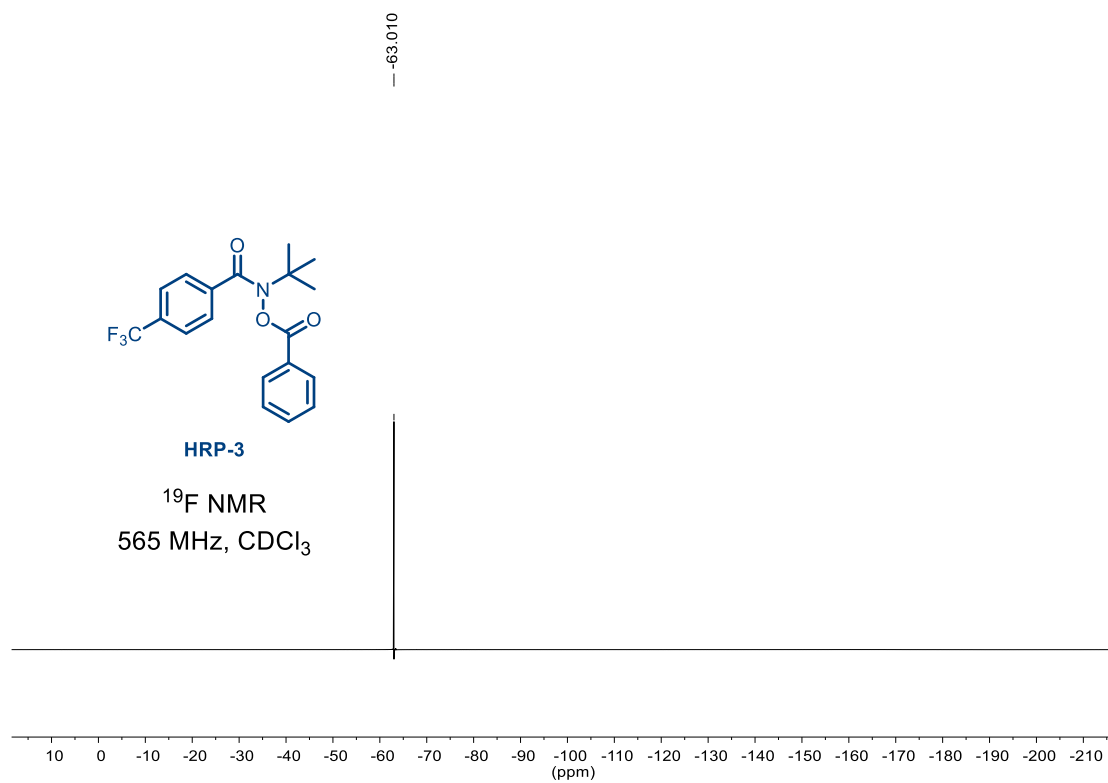

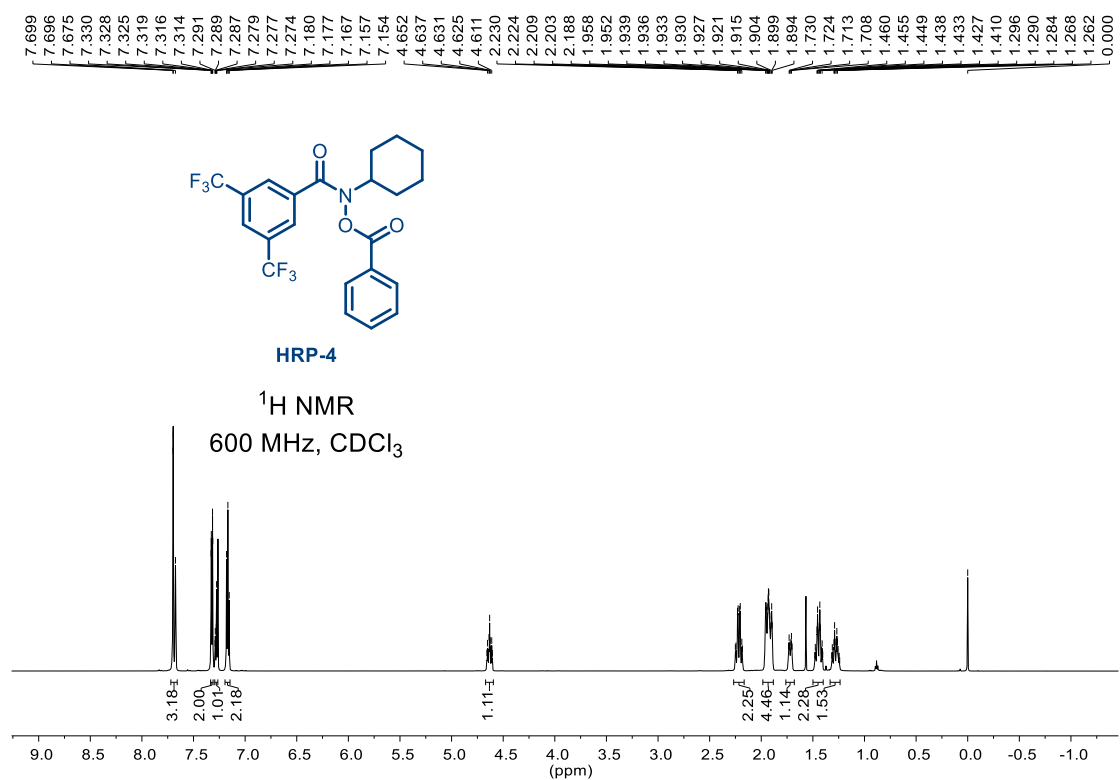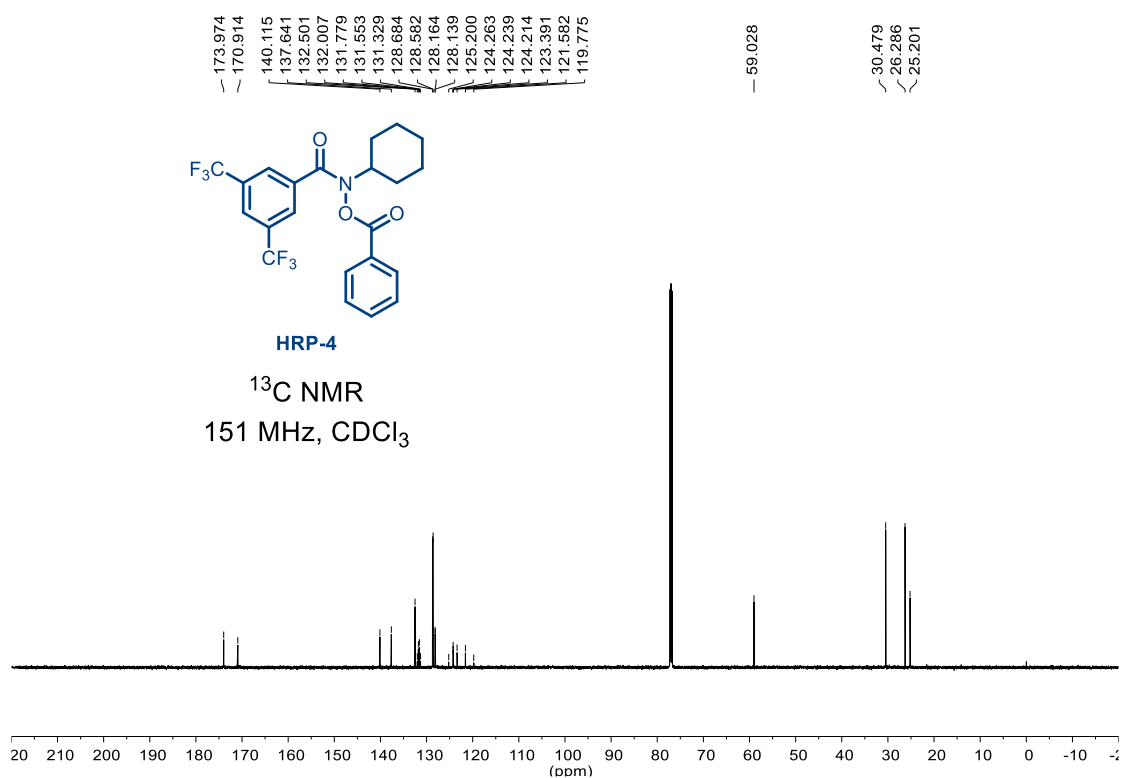

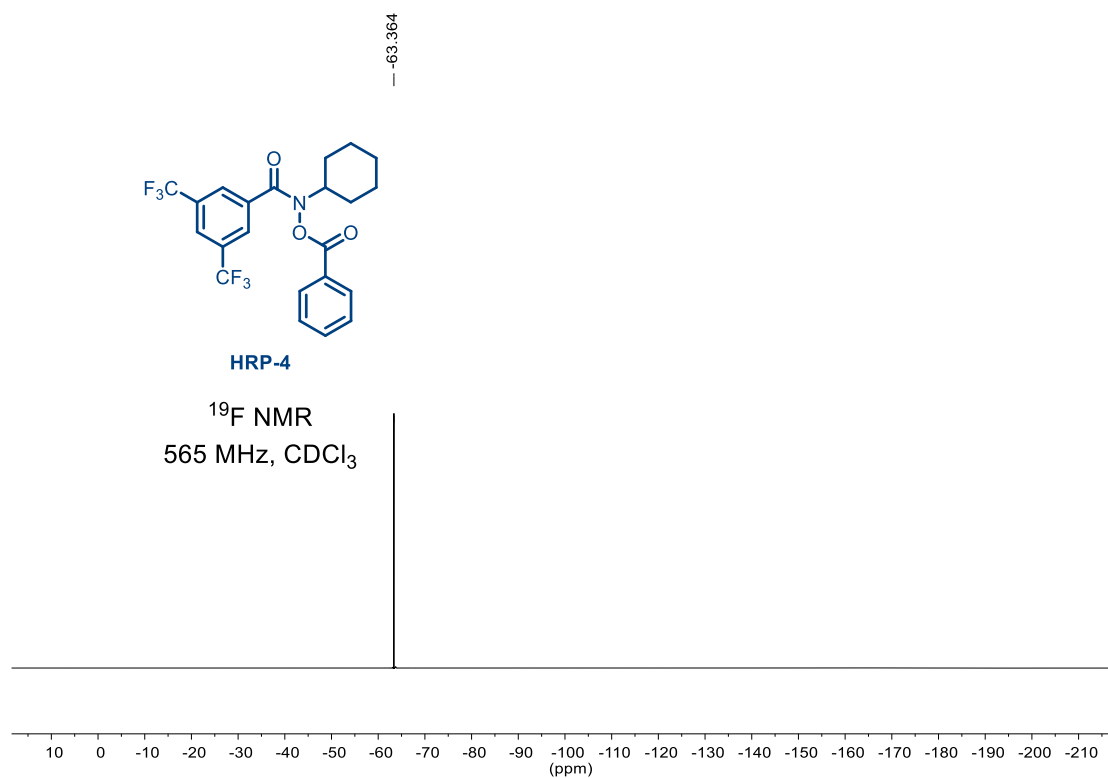



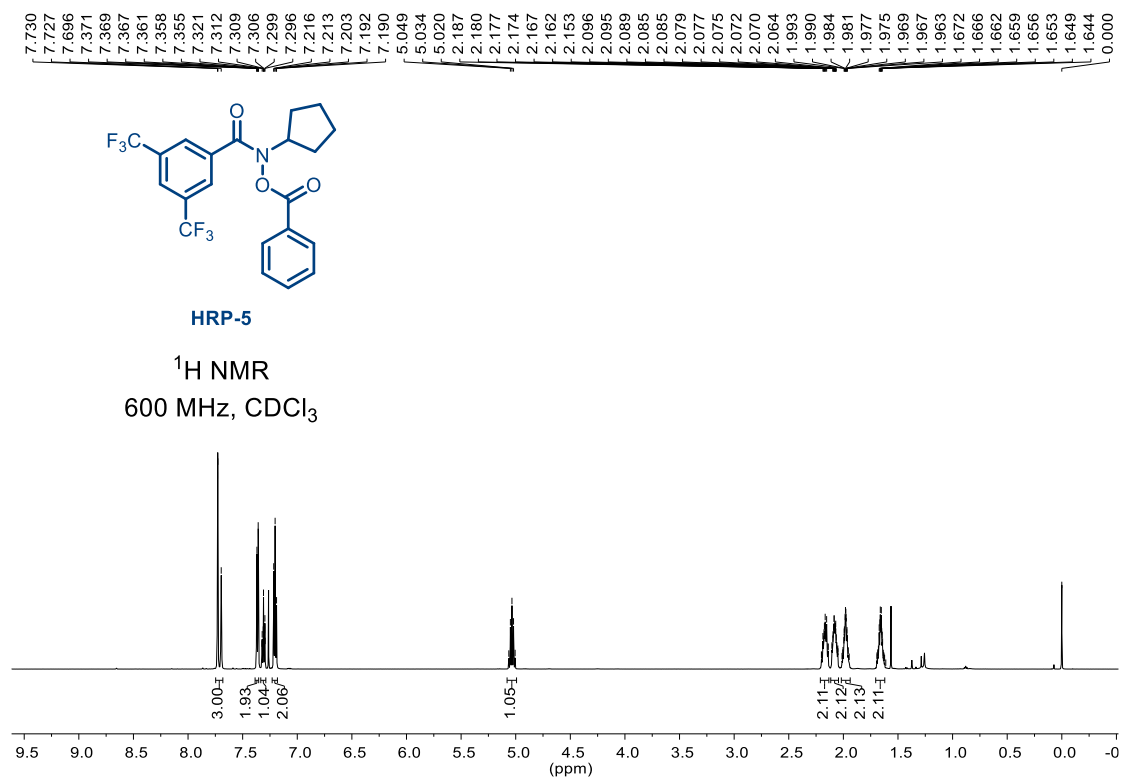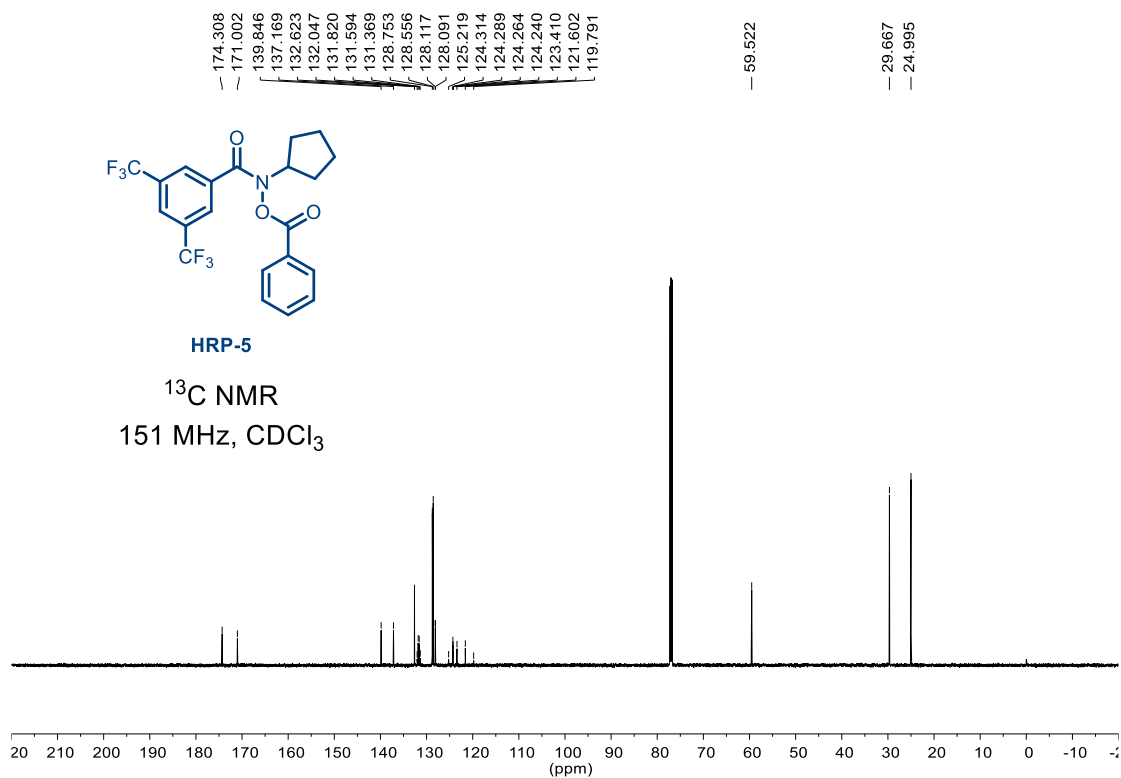

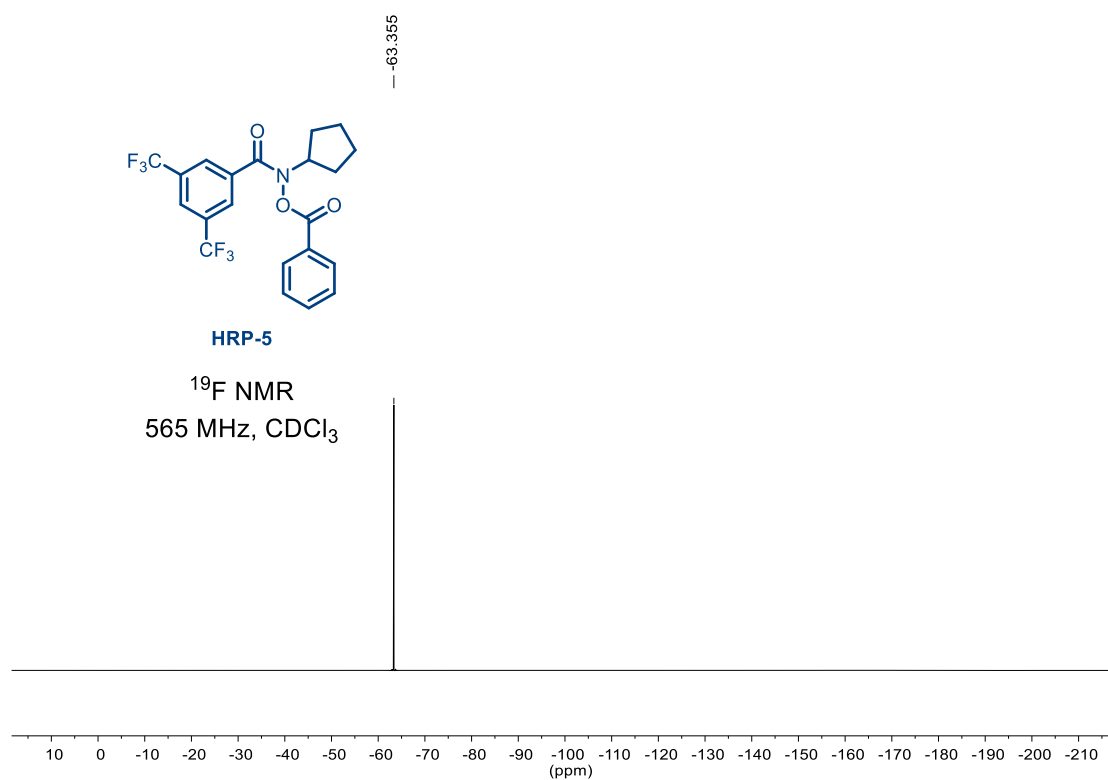

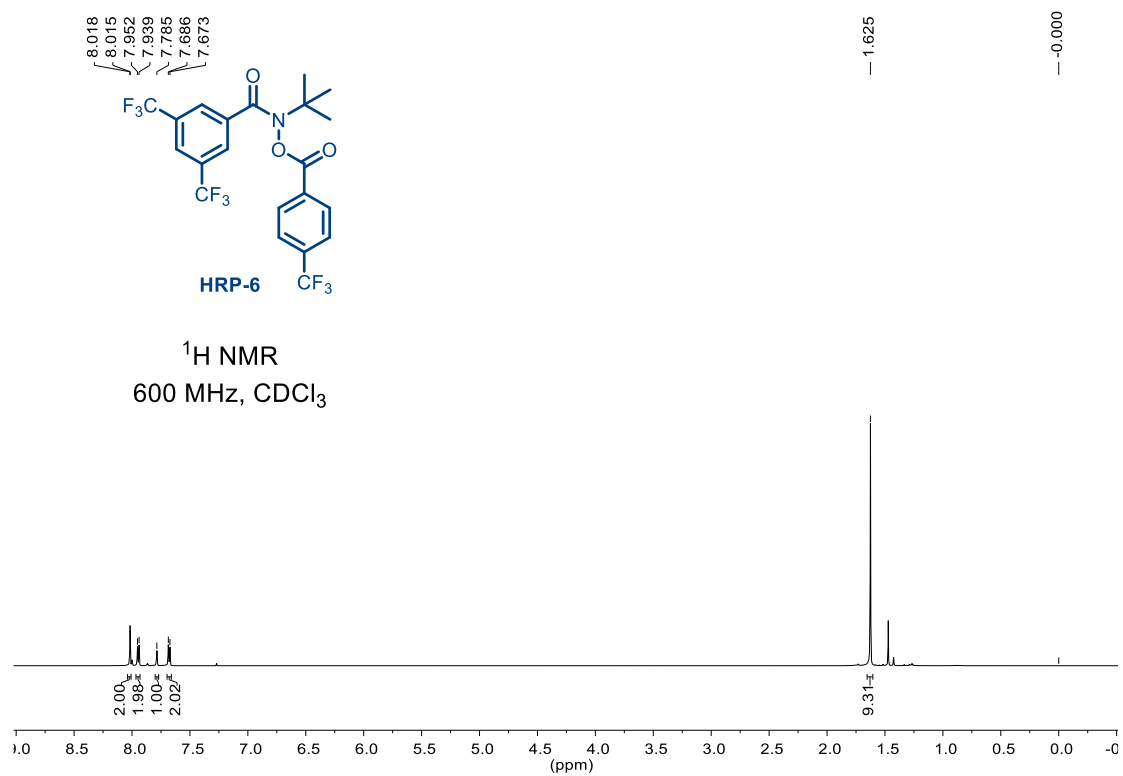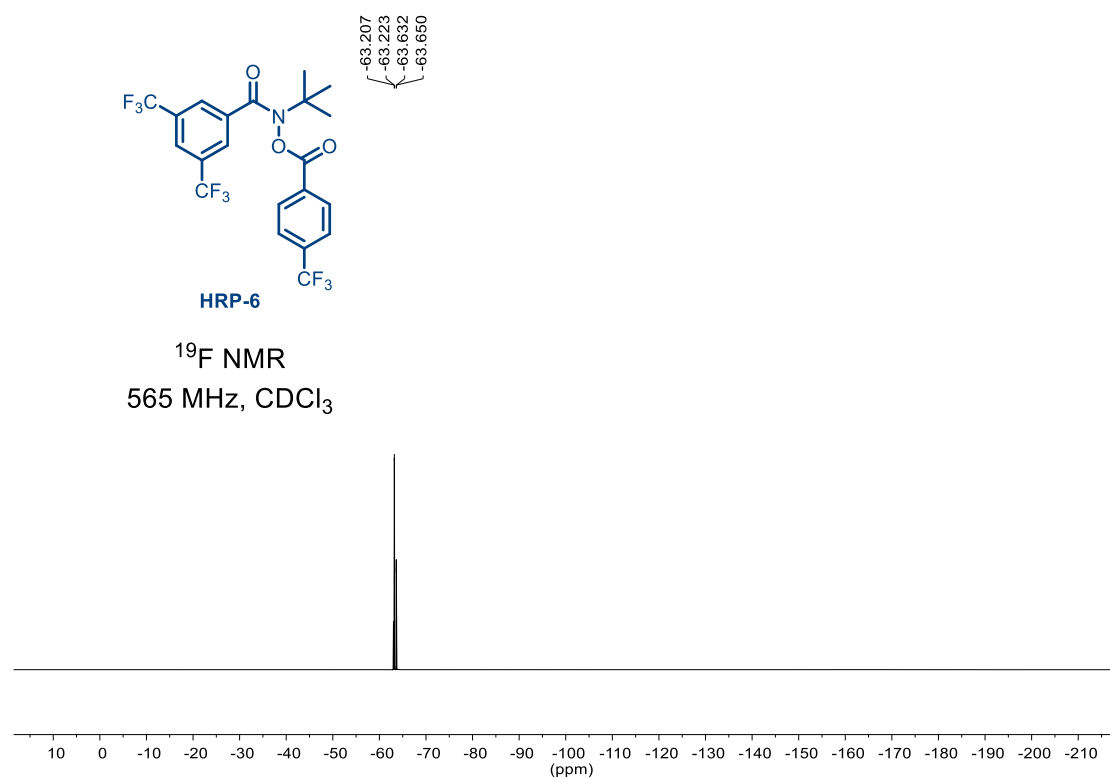

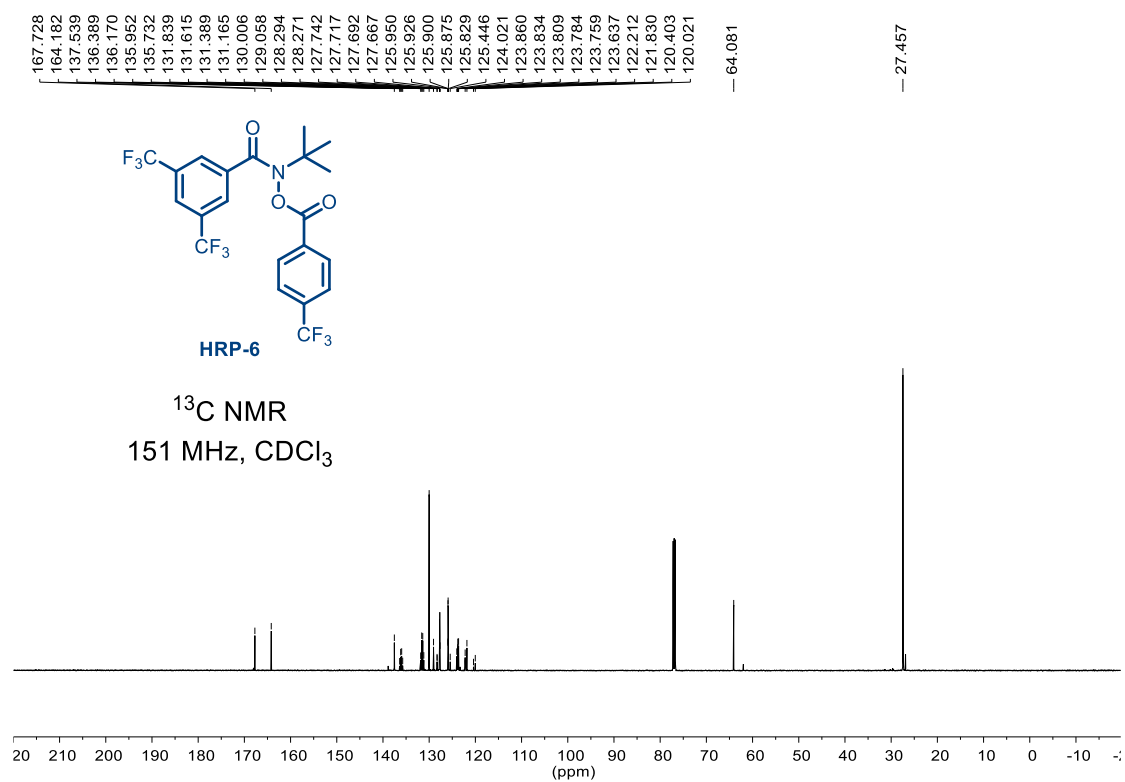

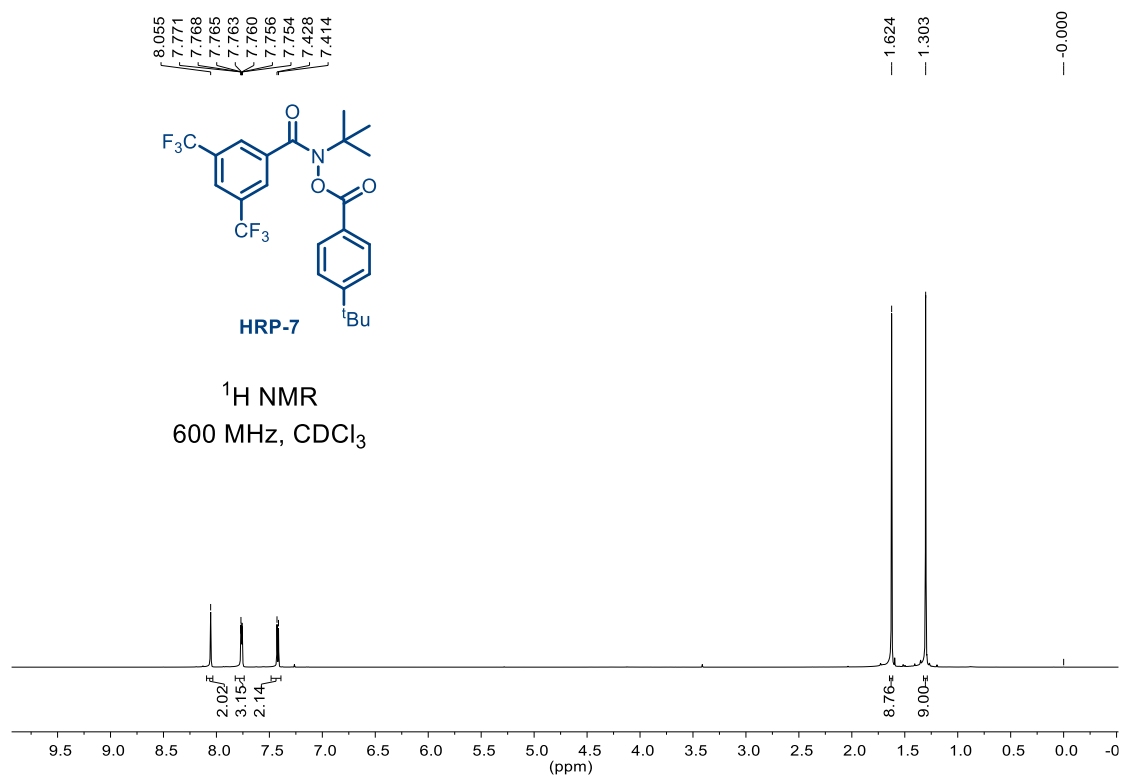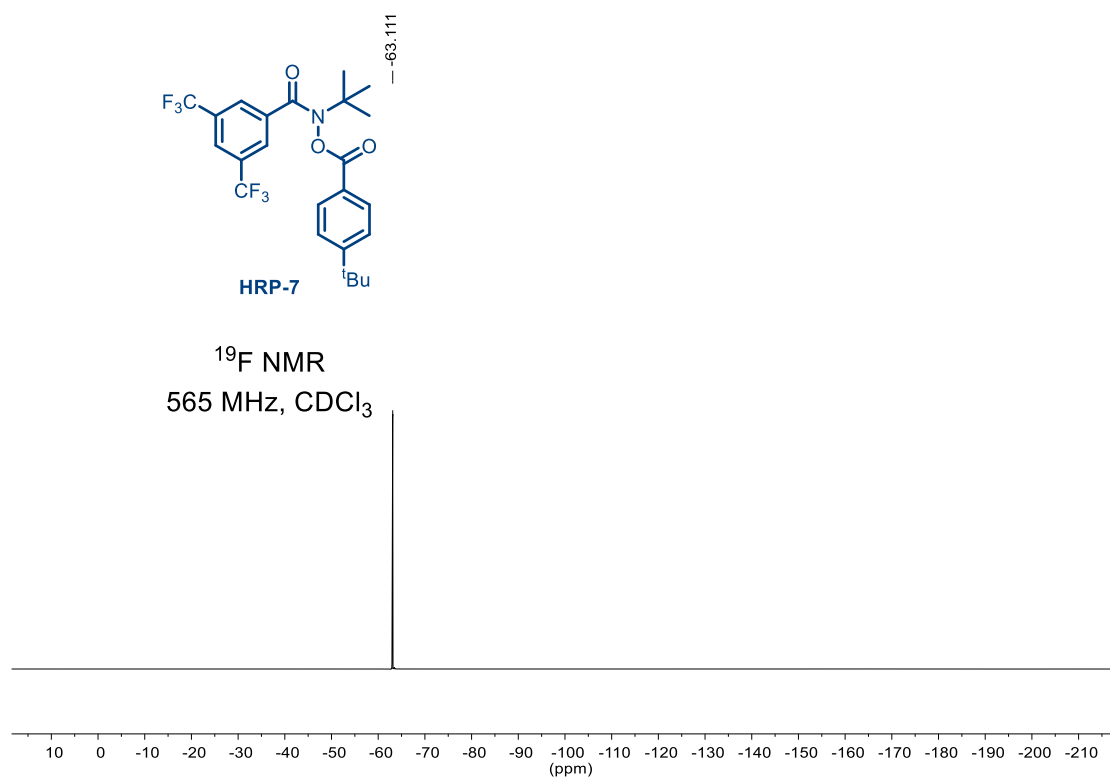

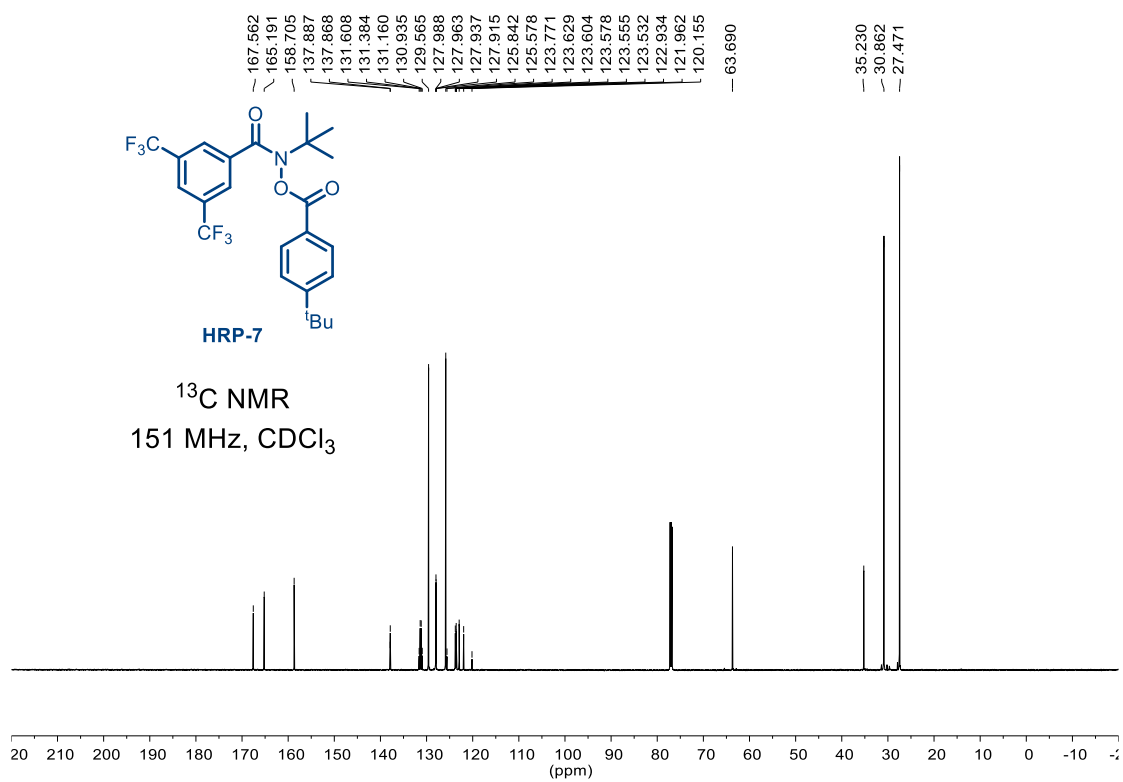

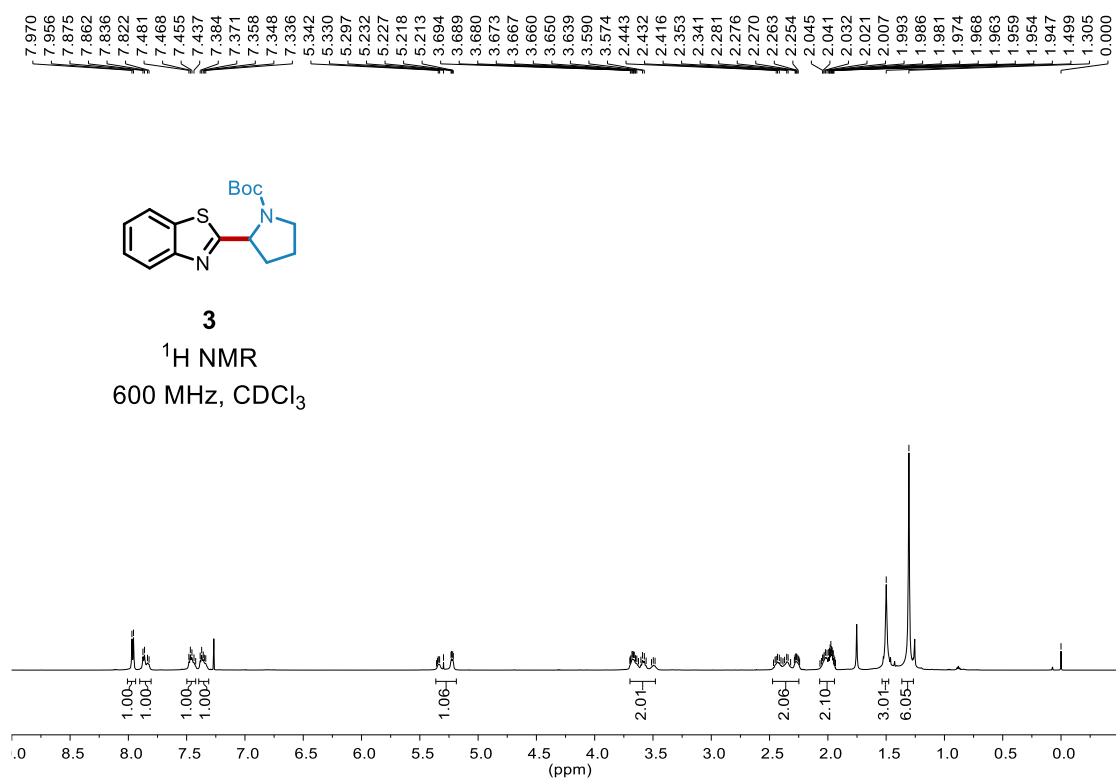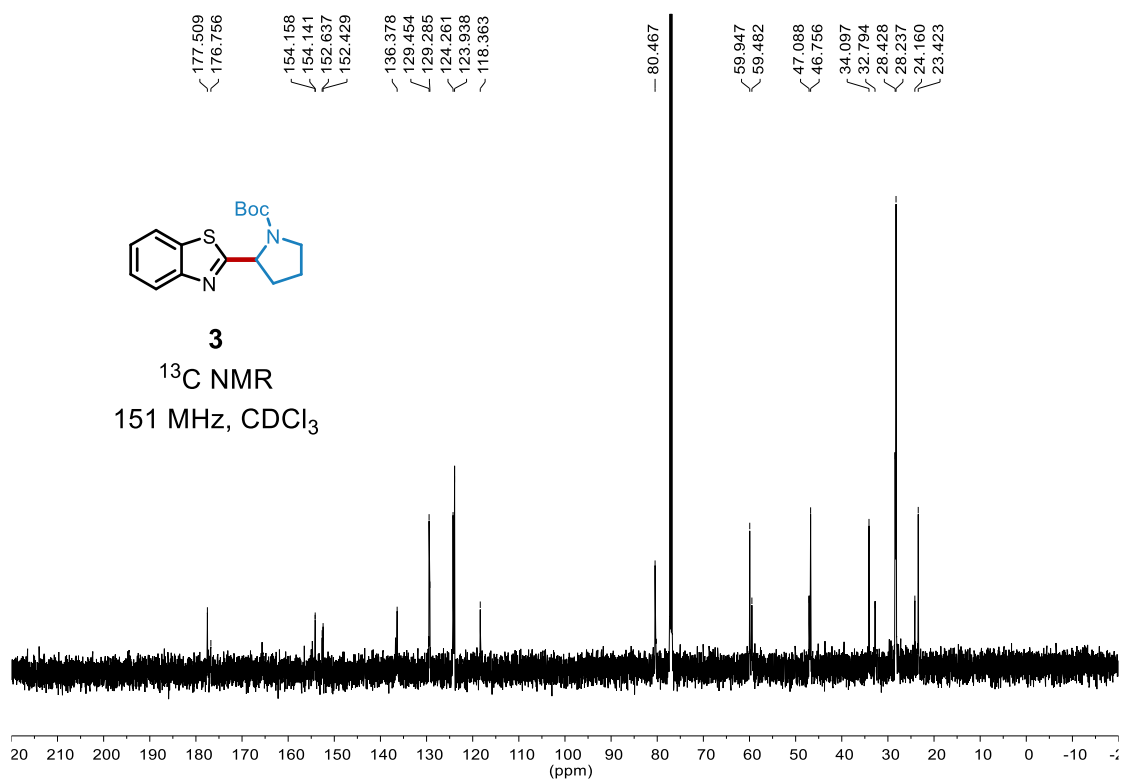

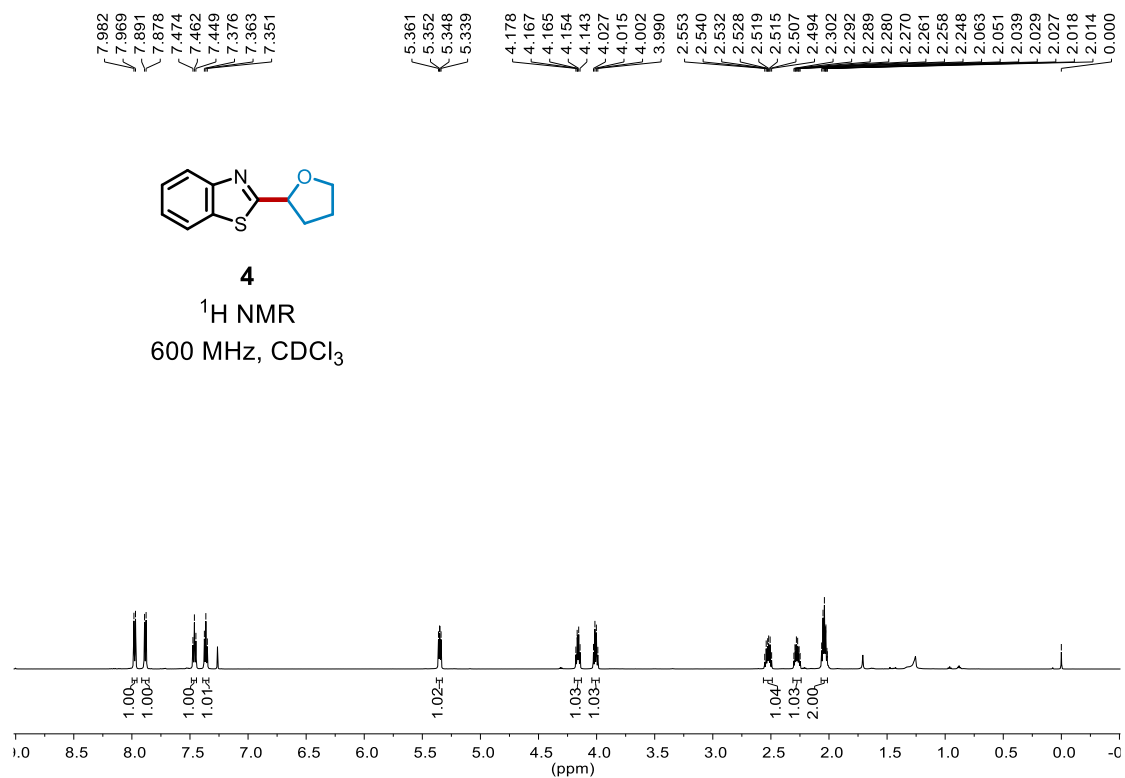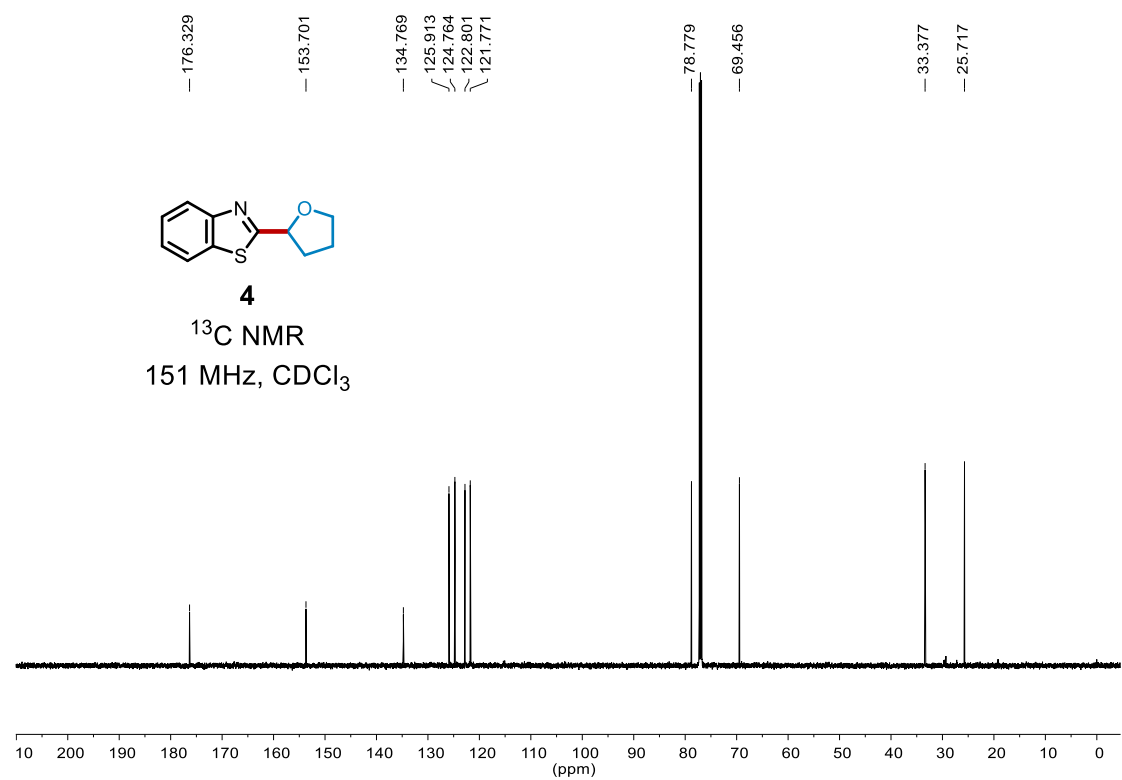



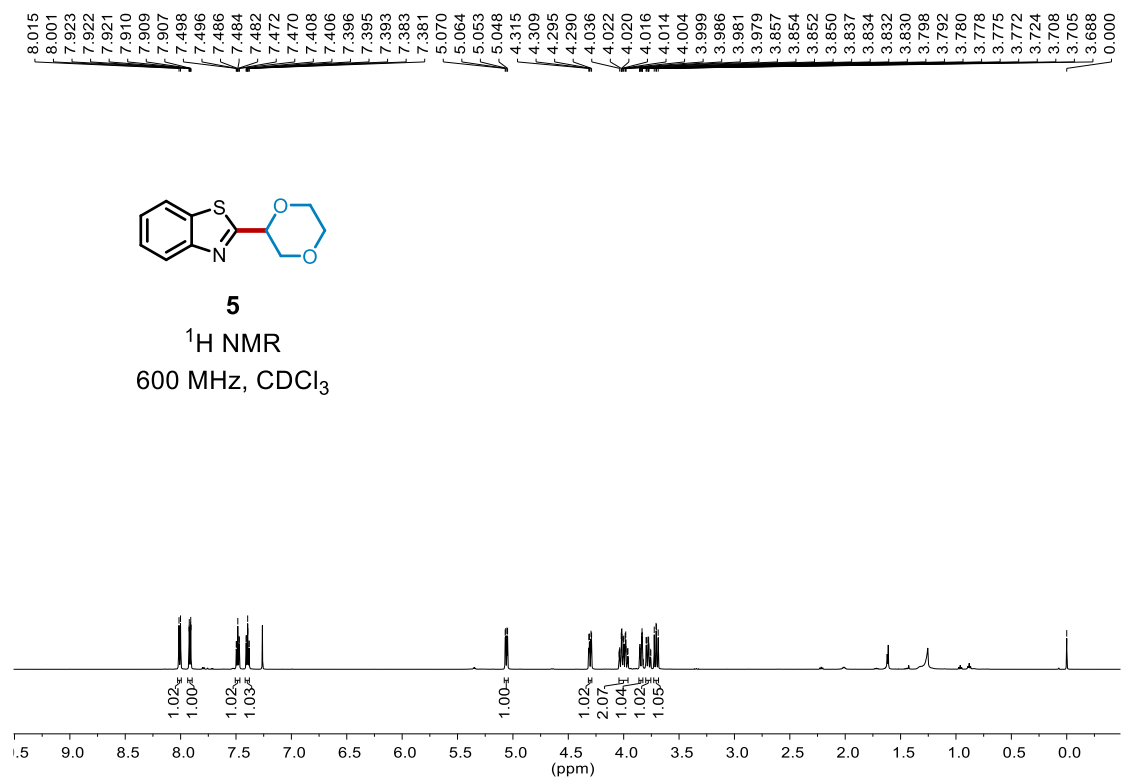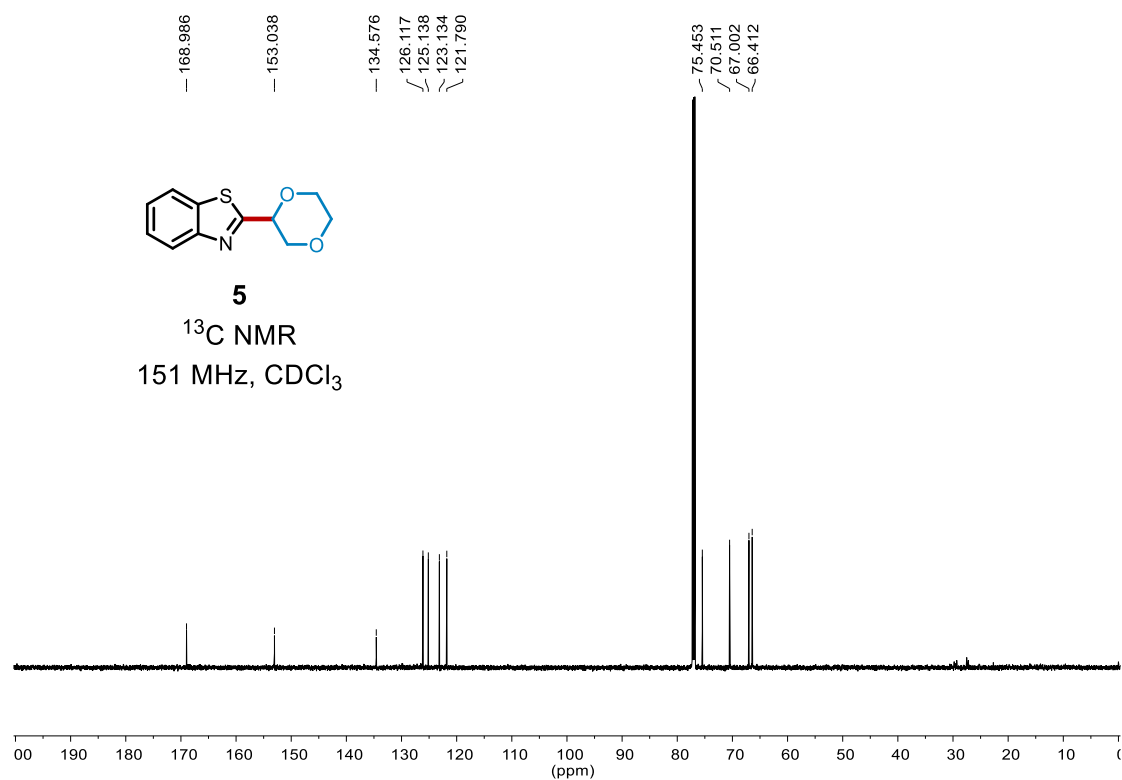

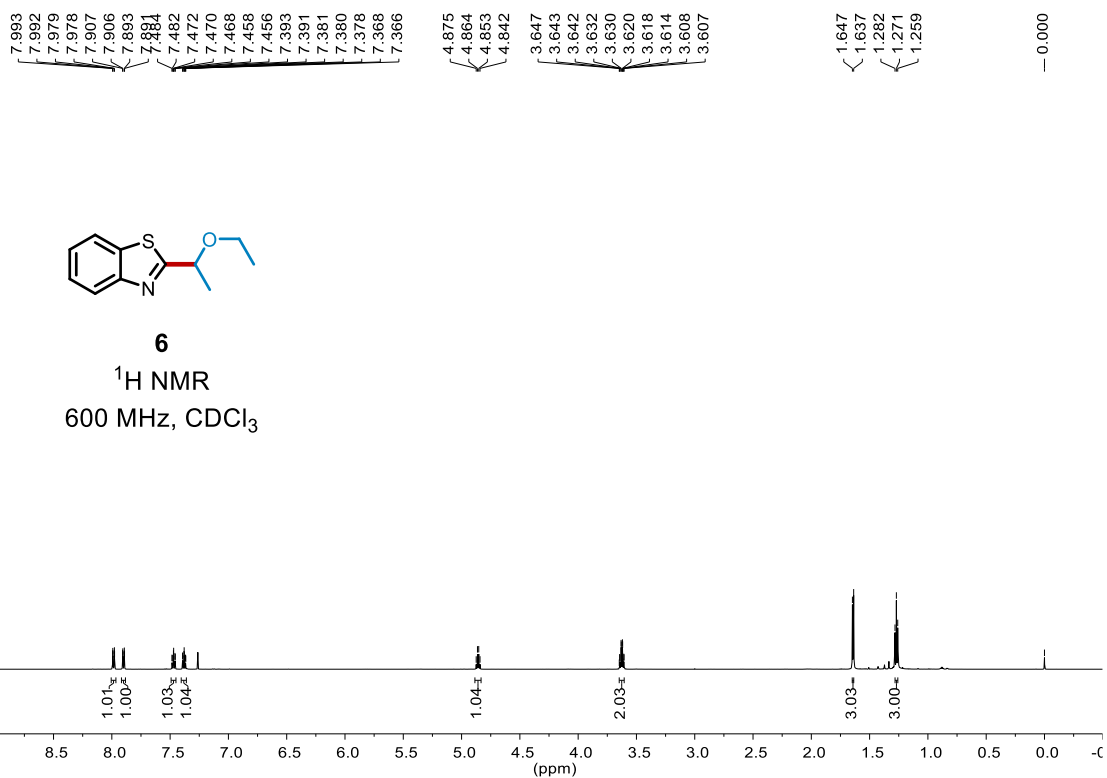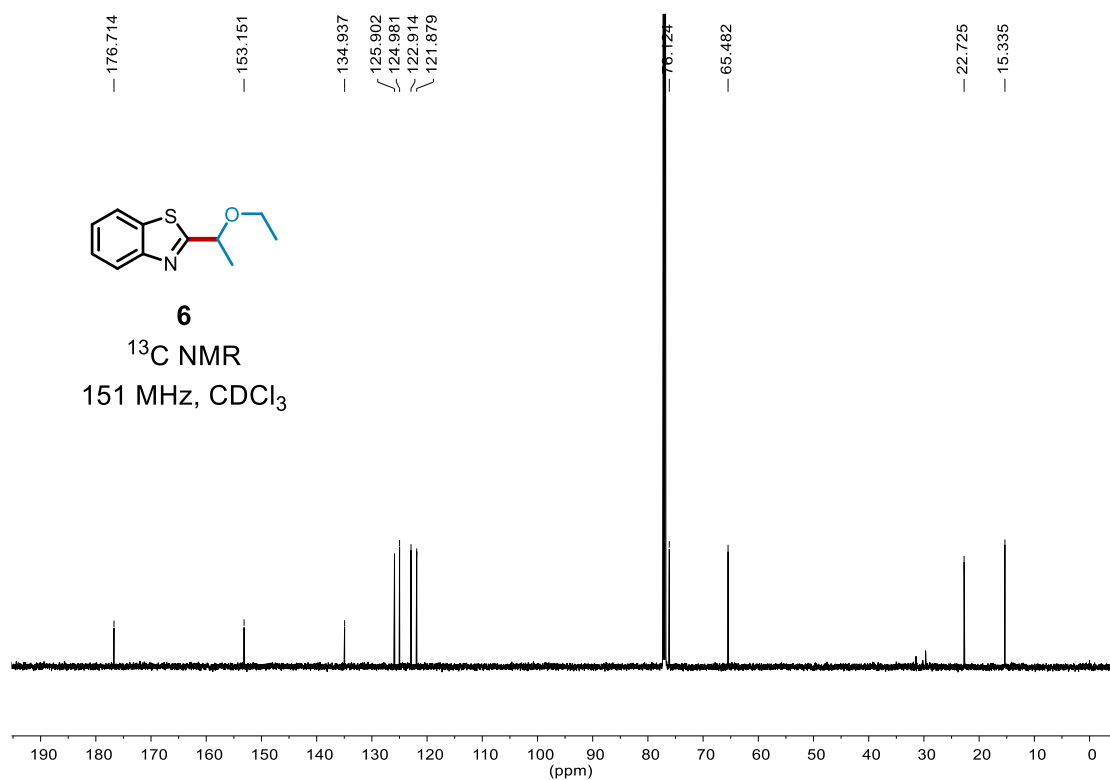

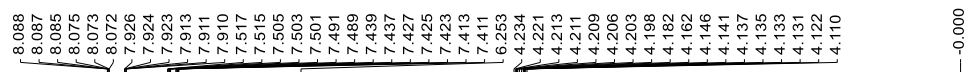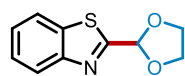

**7**

<sup>1</sup>H NMR  
600 MHz, CDCl<sub>3</sub>

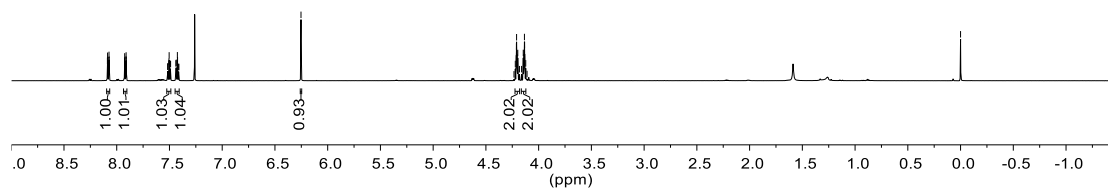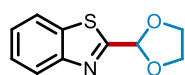

**7**

<sup>13</sup>C NMR  
151 MHz, CDCl<sub>3</sub>

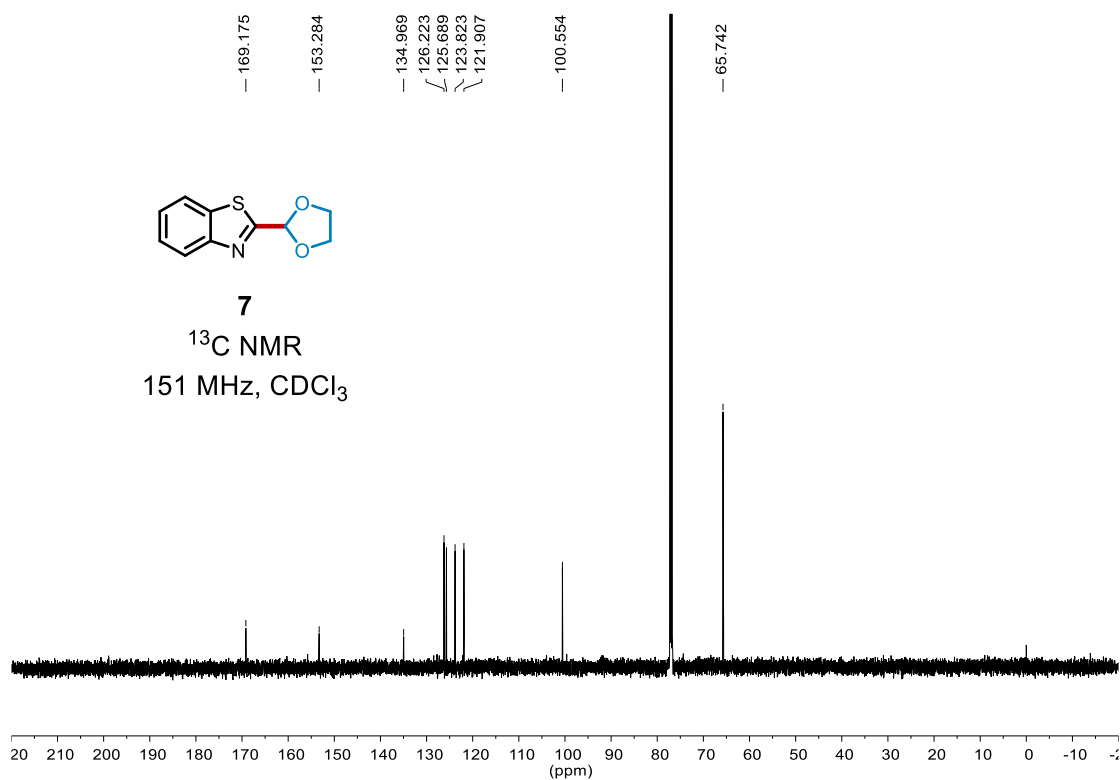

8.138  
8.124  
7.916  
7.902  
7.549  
7.536  
7.523  
7.467  
7.454  
7.442  
7.306  
6.967  
6.960  
6.954  
6.950  
6.945  
6.938  
6.931  
6.924  
6.919  
6.917  
6.914  
6.909  
6.901

— 0.000

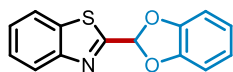

**8**

$^1\text{H}$  NMR  
600 MHz,  $\text{CDCl}_3$

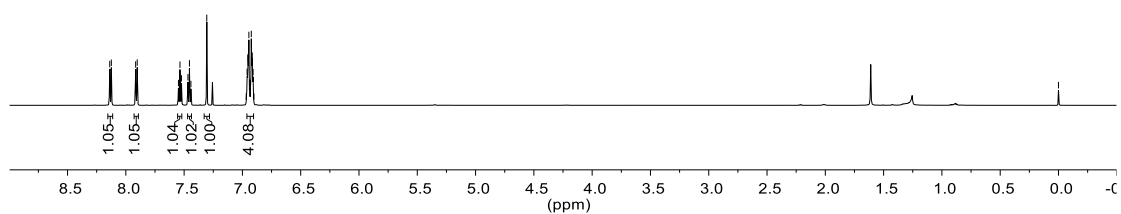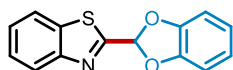

**8**

$^{13}\text{C}$  NMR  
151 MHz,  $\text{CDCl}_3$

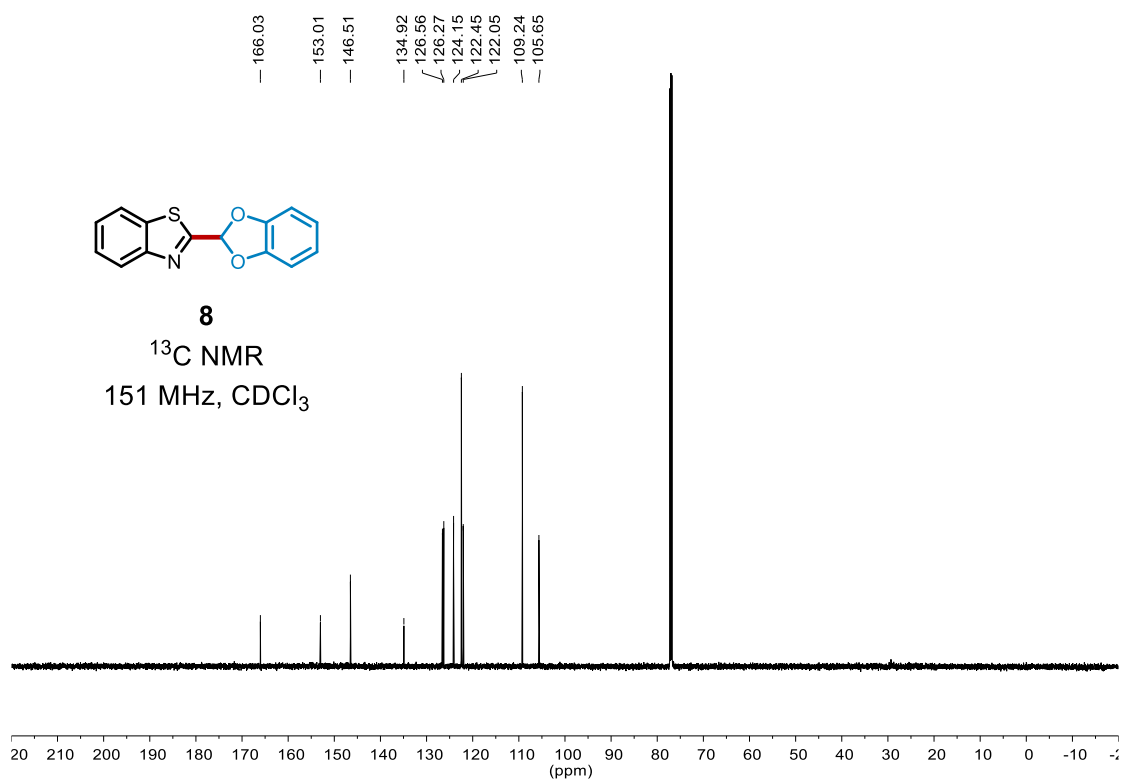

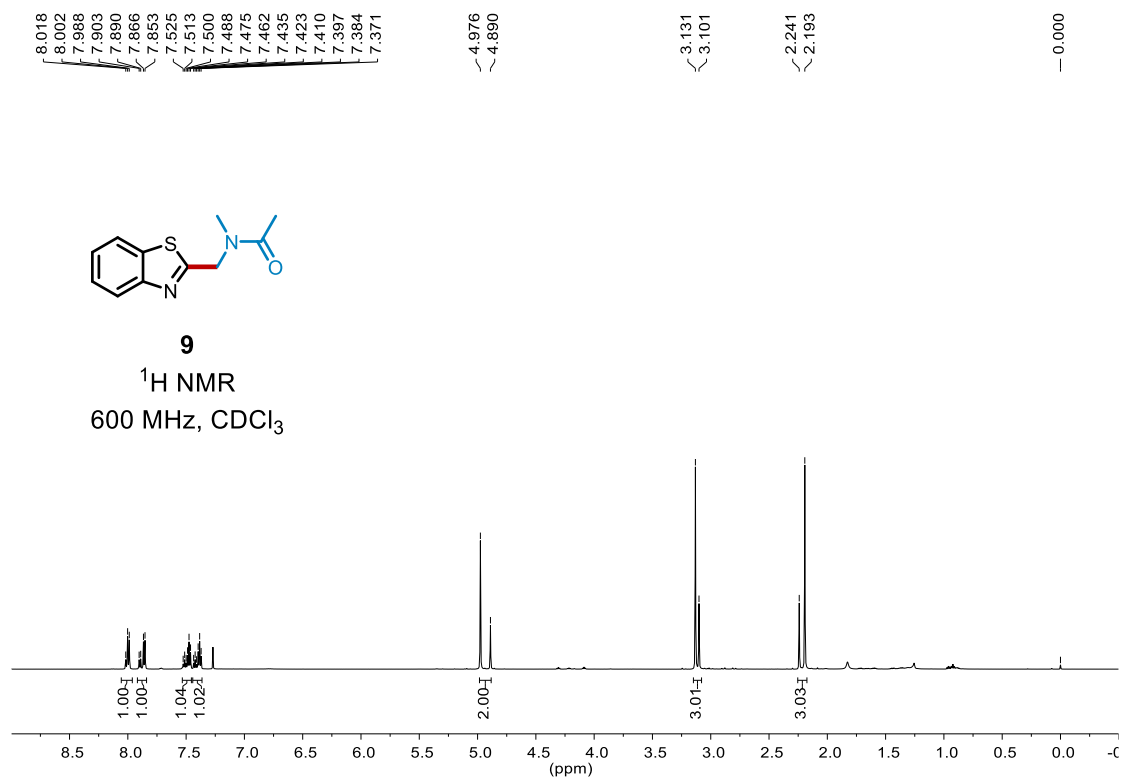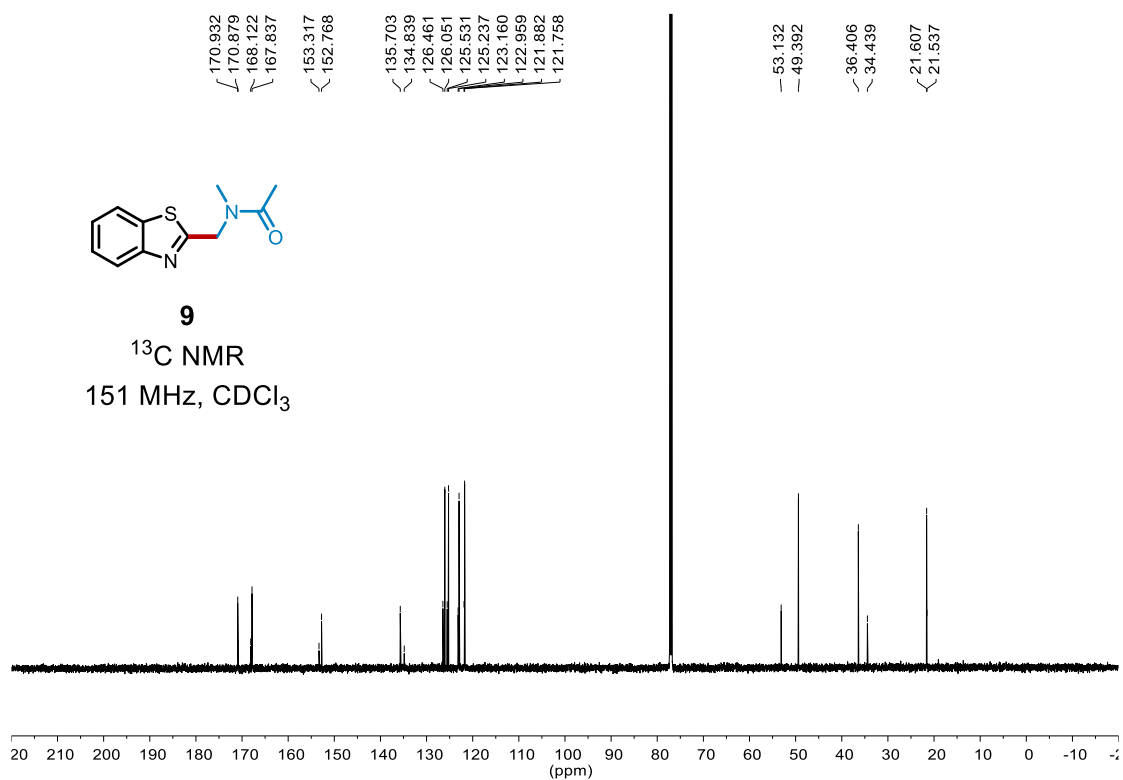

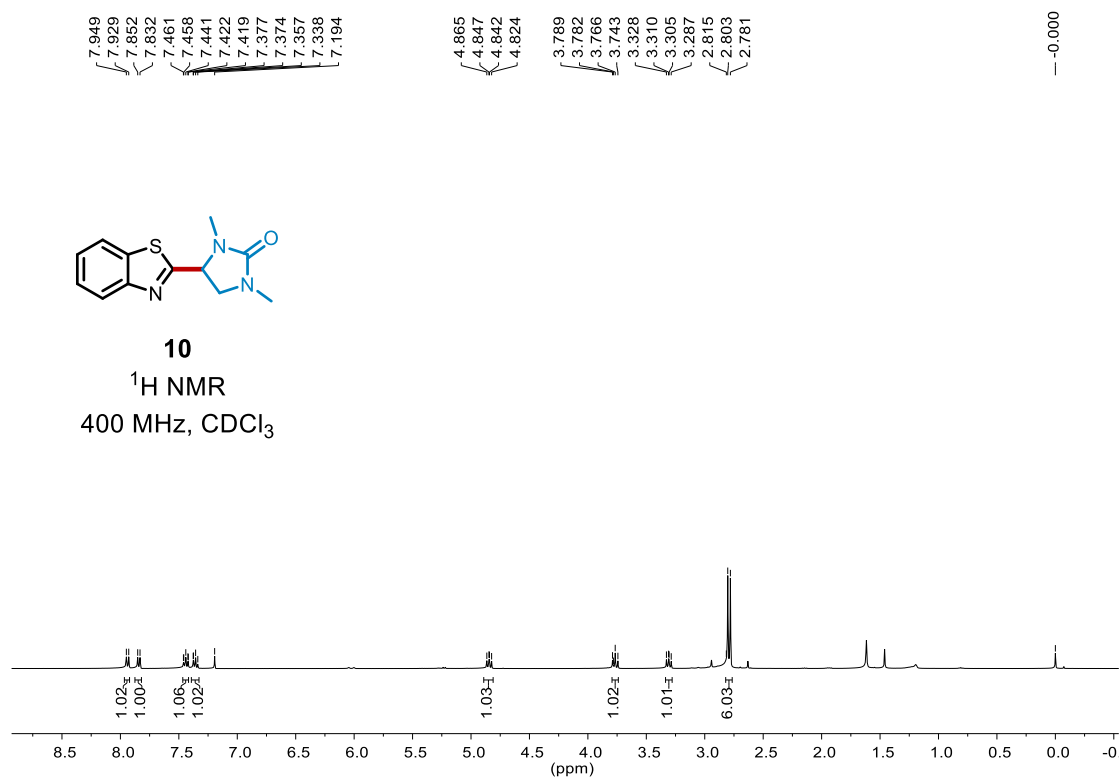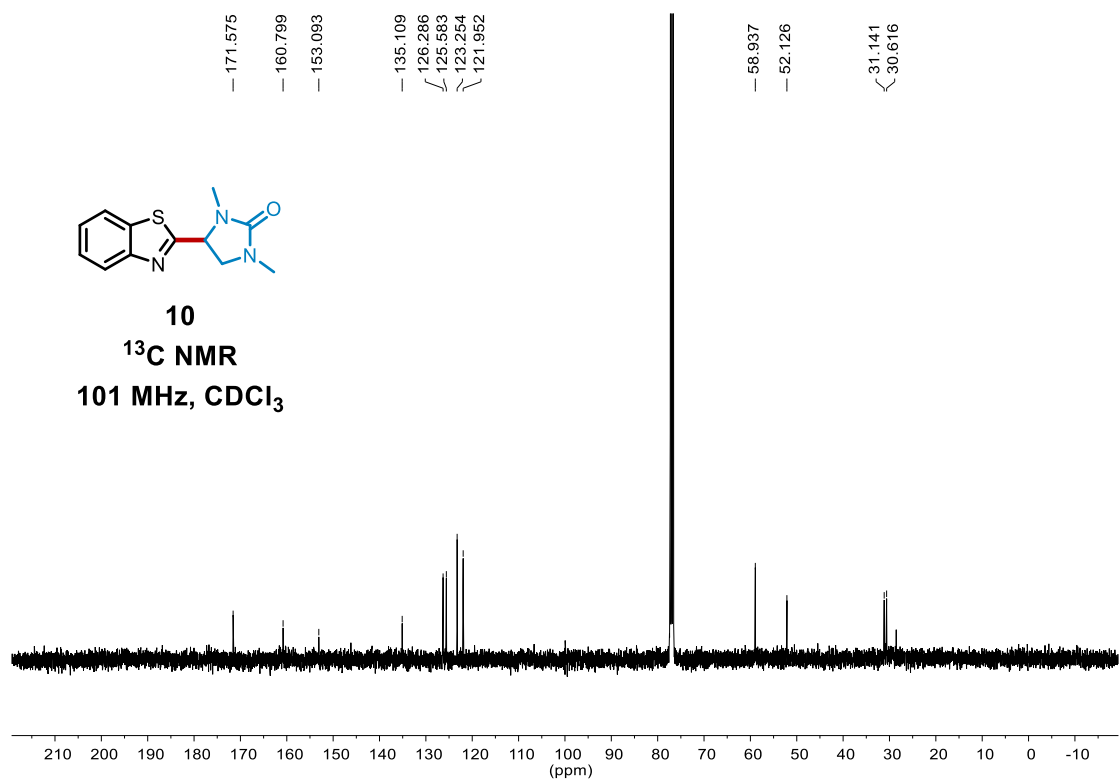

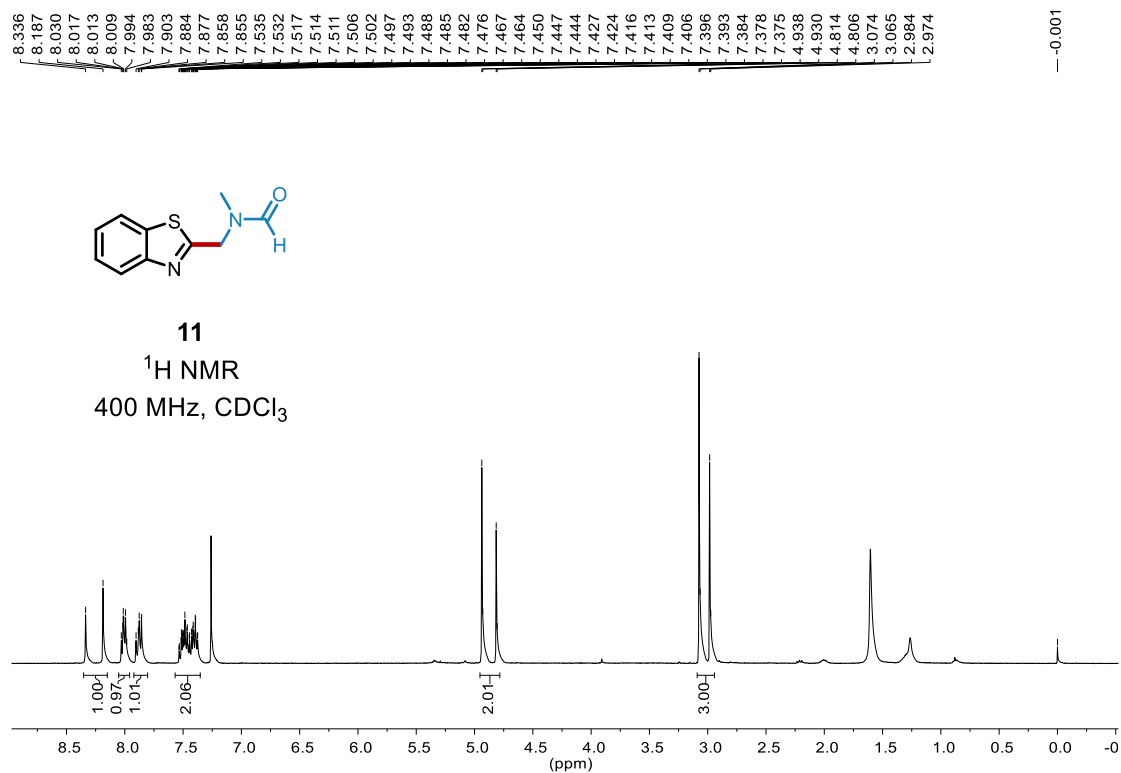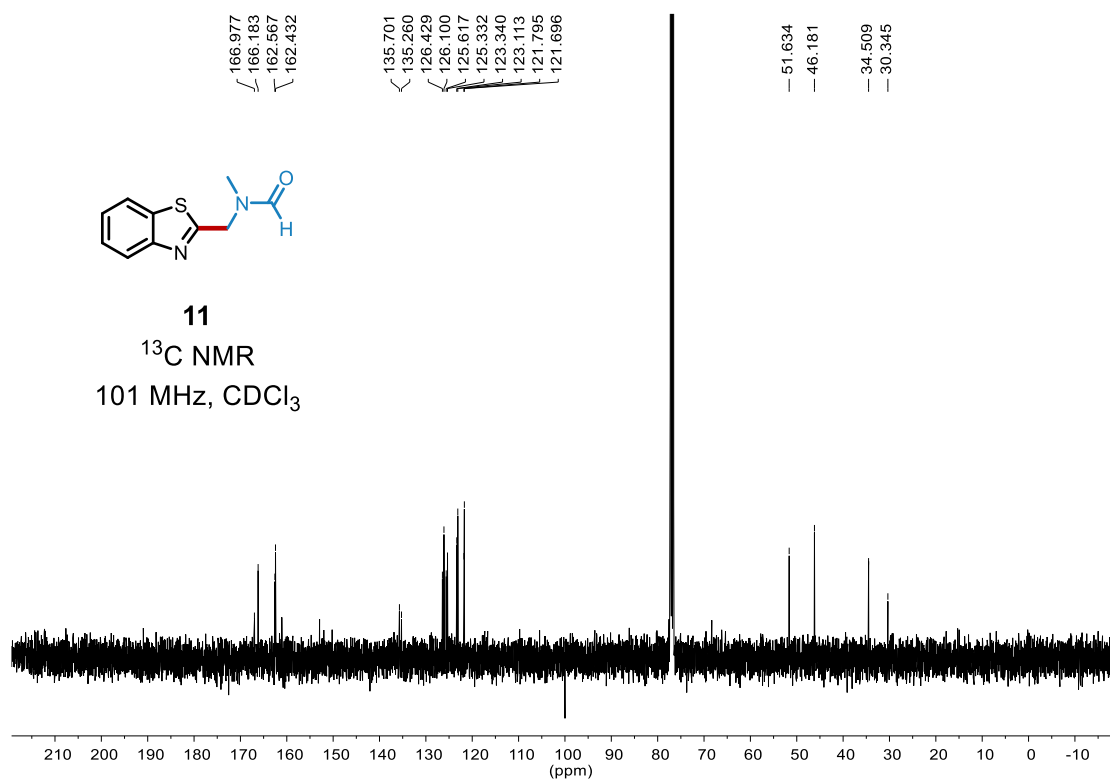

7.830  
7.828  
7.817  
7.815  
7.517  
7.514  
7.505  
7.503  
7.501  
7.491  
7.488  
7.335  
7.333  
7.323  
7.321  
7.320  
7.310  
7.308  
7.292  
7.290  
7.278  
7.276  
3.730  
3.716  
3.703  
2.080  
2.075  
2.072  
2.069  
2.067  
2.062  
2.062  
2.059  
2.056  
2.053  
2.051  
1.942  
1.932  
1.928  
1.921  
1.917  
1.915  
1.908  
1.835  
1.830  
1.828  
1.826  
1.823  
1.821  
1.818  
1.813  
1.810  
1.809  
1.726  
1.724  
1.718  
1.713  
1.705  
0.000

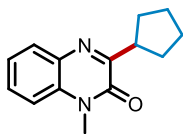

**12**

<sup>1</sup>H NMR

600 MHz, CDCl<sub>3</sub>

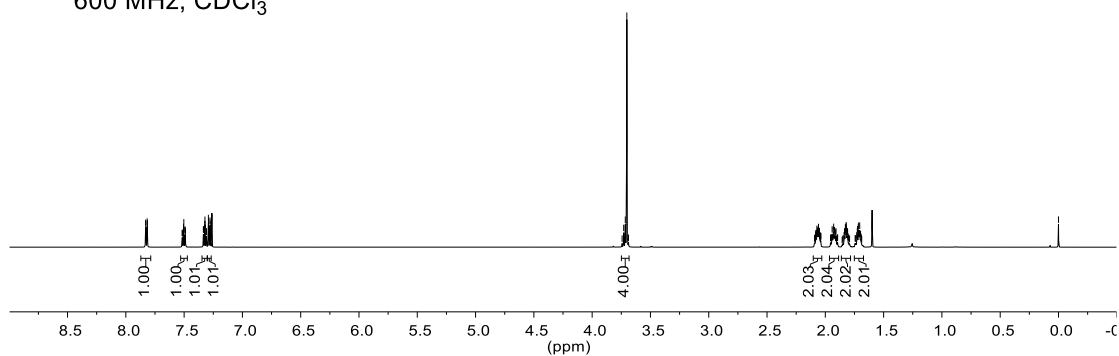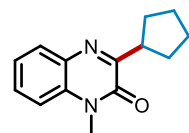

**12**

<sup>13</sup>C NMR

151 MHz, CDCl<sub>3</sub>

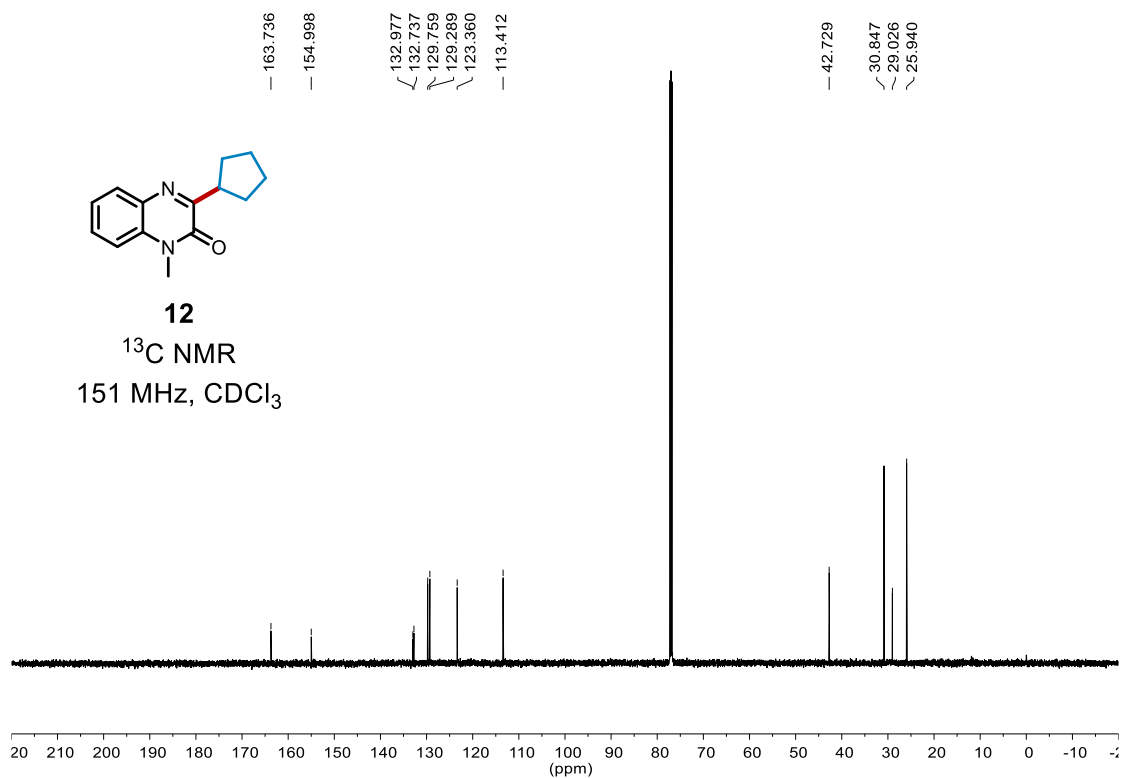



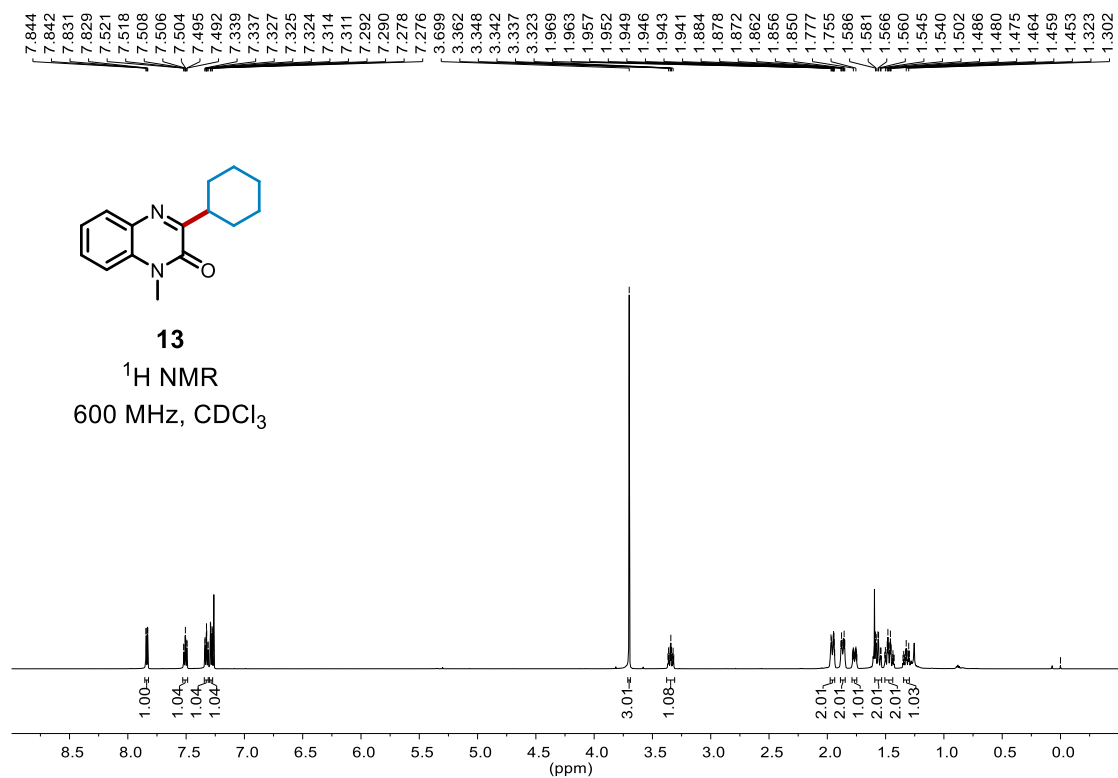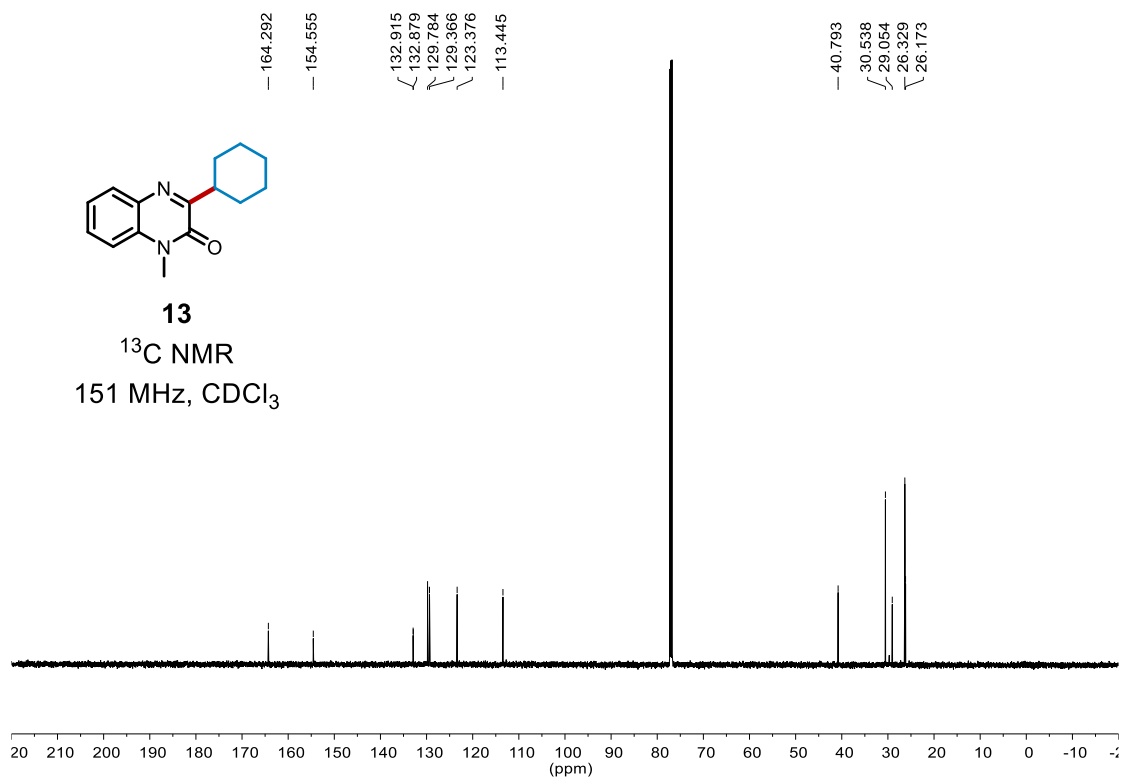

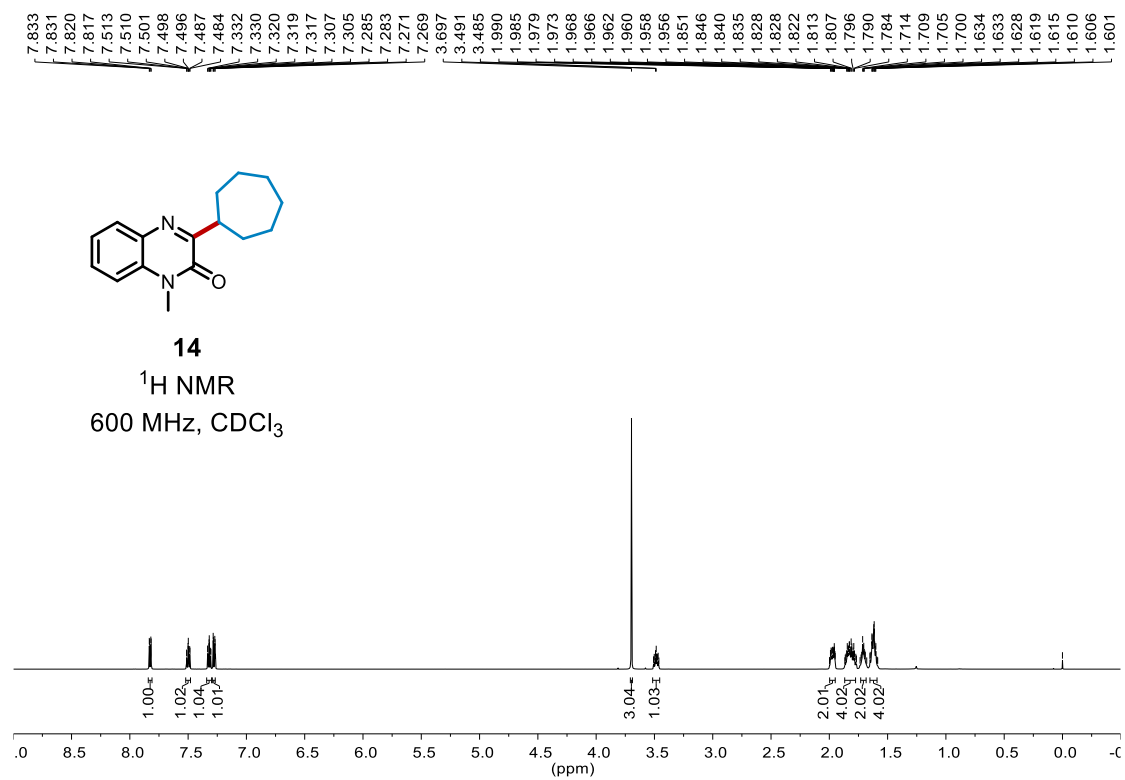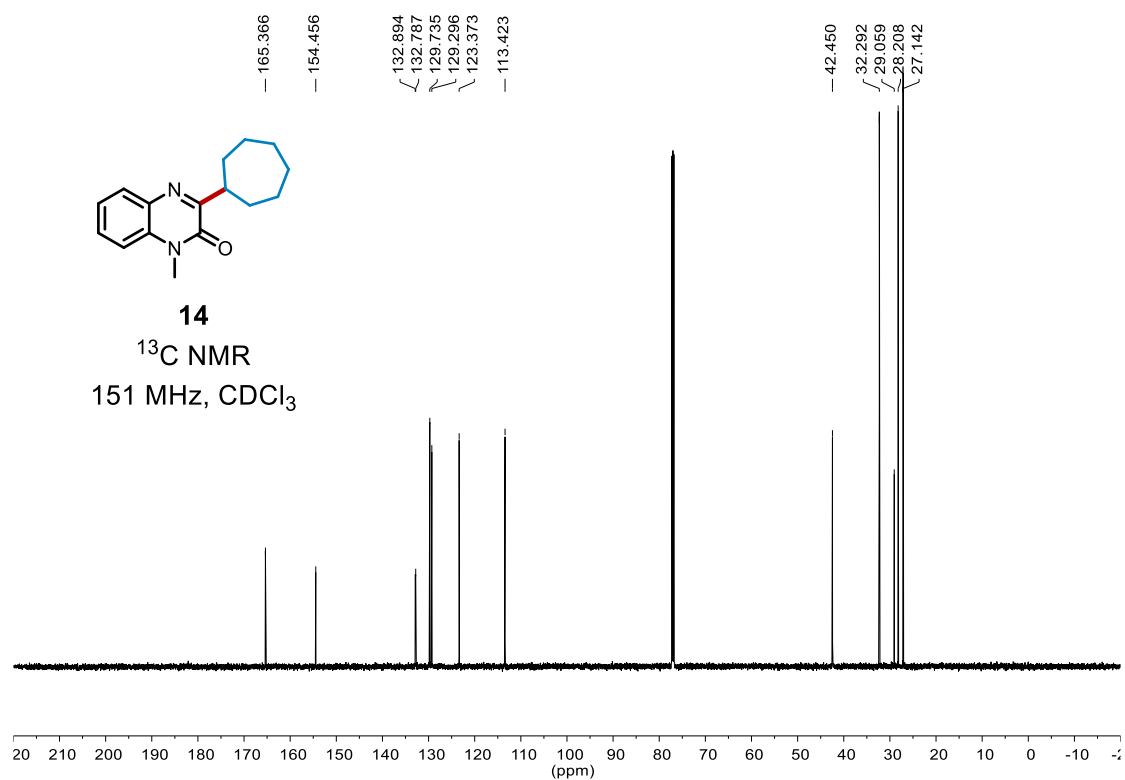

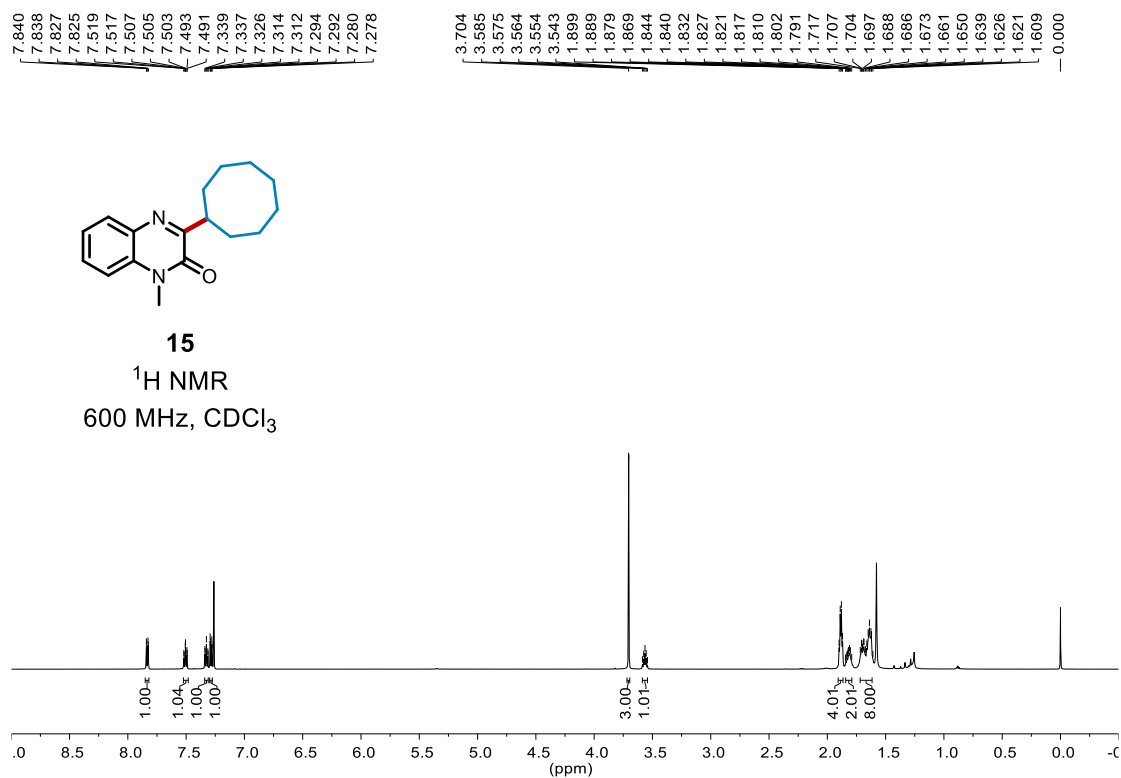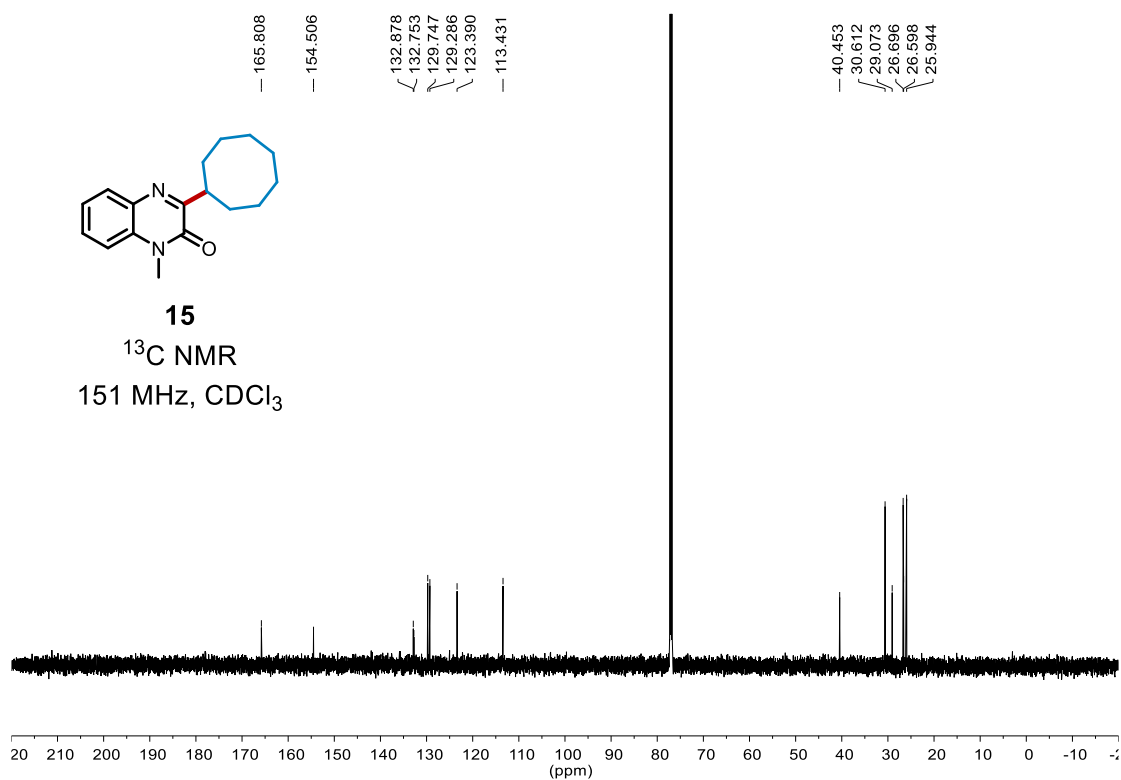

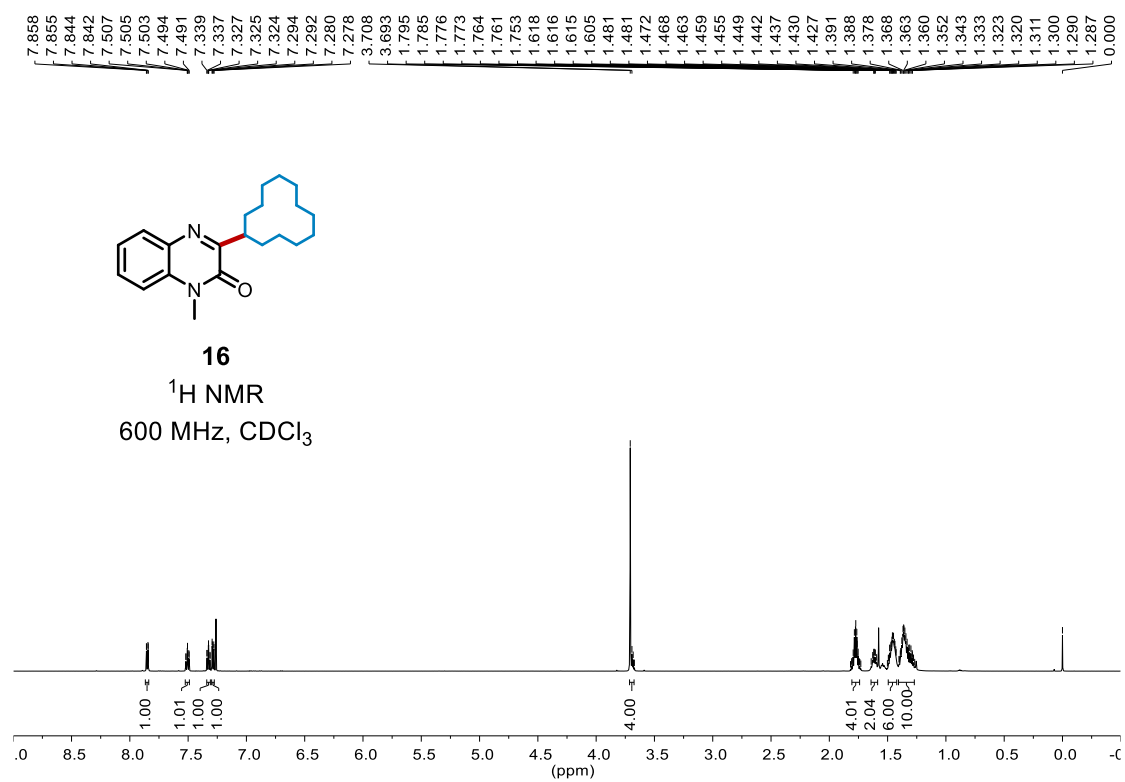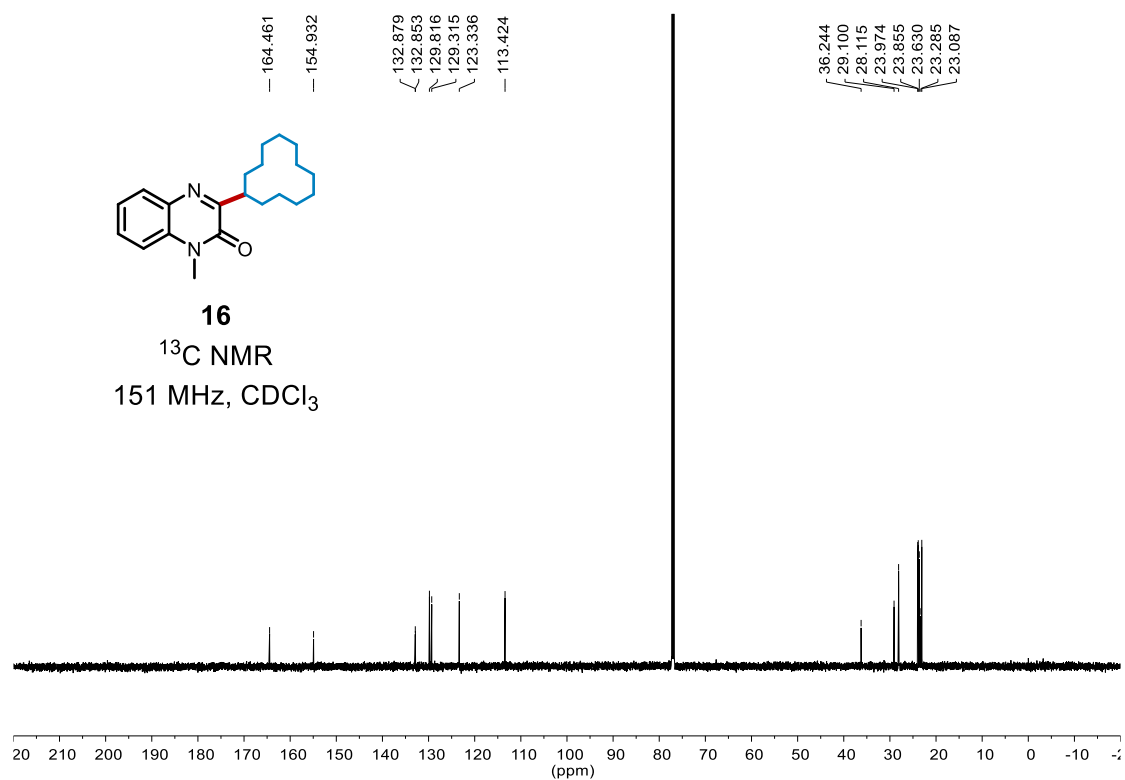

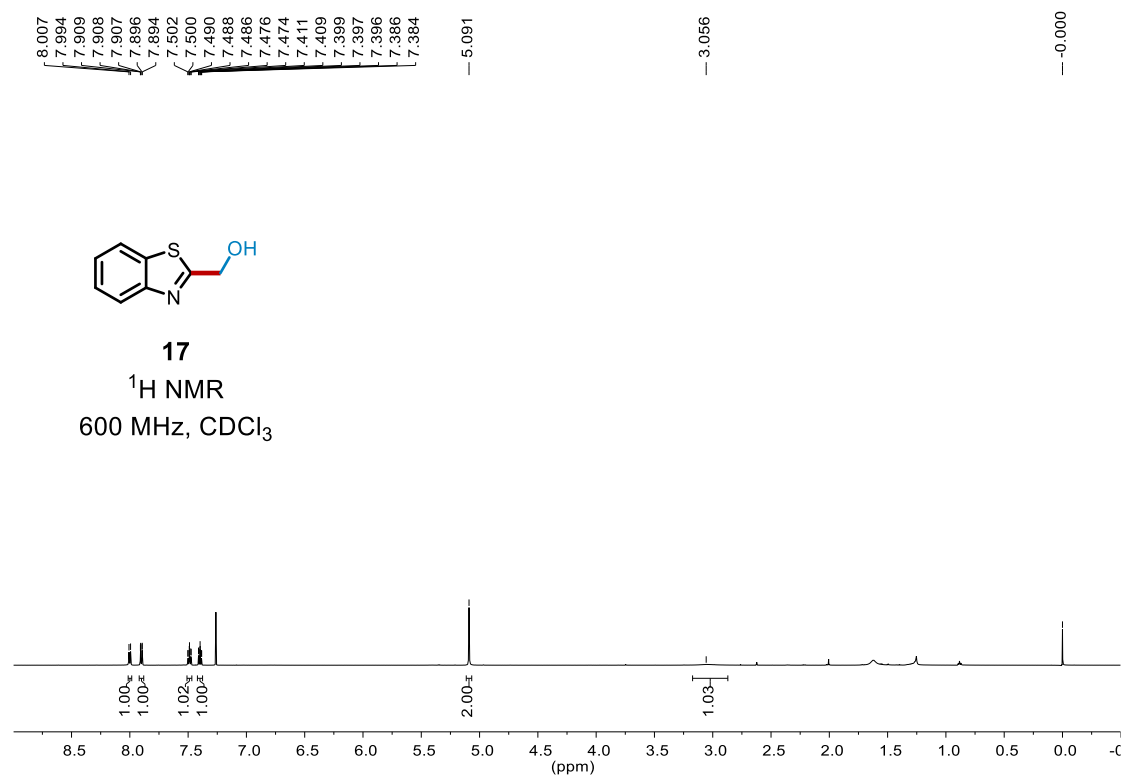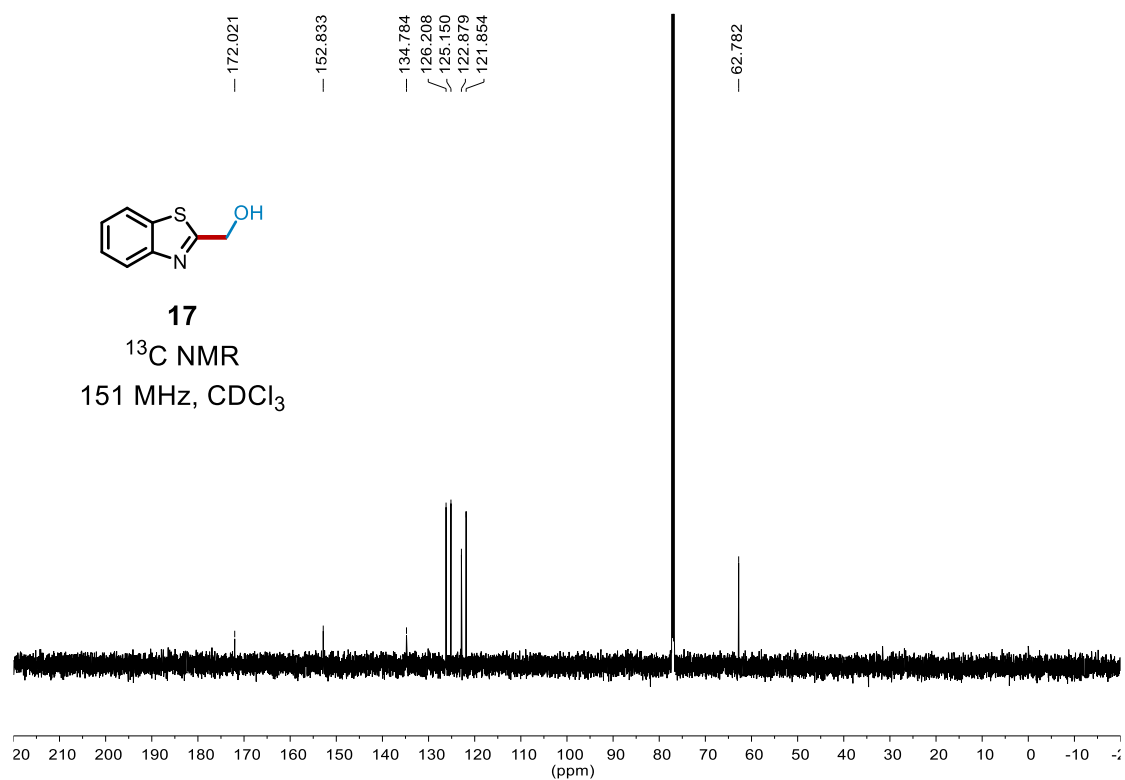

7.994  
7.993  
7.981  
7.979  
7.897  
7.895  
7.884  
7.882  
7.489  
7.484  
7.479  
7.477  
7.475  
7.470  
7.465  
7.463  
7.397  
7.395  
7.385  
7.383  
7.381  
7.371  
7.369  
5.277  
5.266  
5.255  
5.244

— 3.340

1.723  
1.712

— 0.000

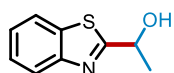

**18**

<sup>1</sup>H NMR

600 MHz, CDCl<sub>3</sub>

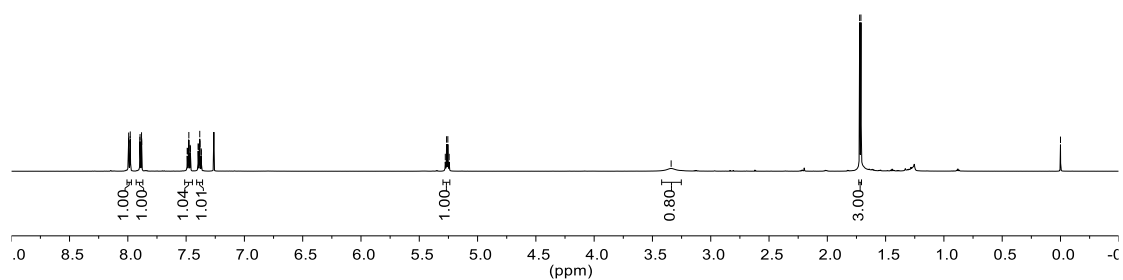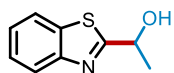

**18**

<sup>13</sup>C NMR

151 MHz, CDCl<sub>3</sub>

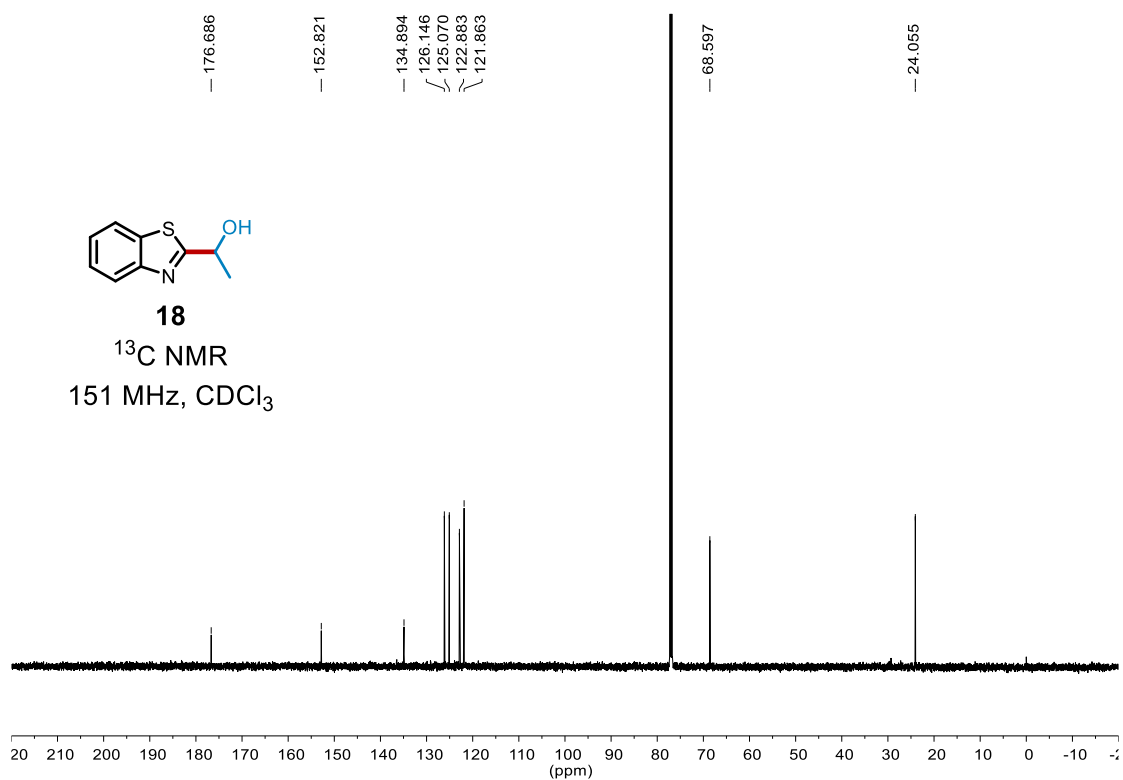



8.005  
7.991  
7.896  
7.895  
7.893  
7.883  
7.881  
7.880  
7.490  
7.488  
7.478  
7.476  
7.474  
7.464  
7.462  
7.396  
7.394  
7.384  
7.382  
7.380  
7.370  
7.368  
4.919  
4.911  
3.184  
3.177  
3.170  
3.165  
2.310  
2.302  
2.298  
2.291  
2.287  
2.279  
2.276  
2.268  
2.264  
2.256  
1.092  
1.081  
0.984  
0.973  
-0.000

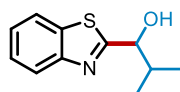

**20**

<sup>1</sup>H NMR

600 MHz, CDCl<sub>3</sub>

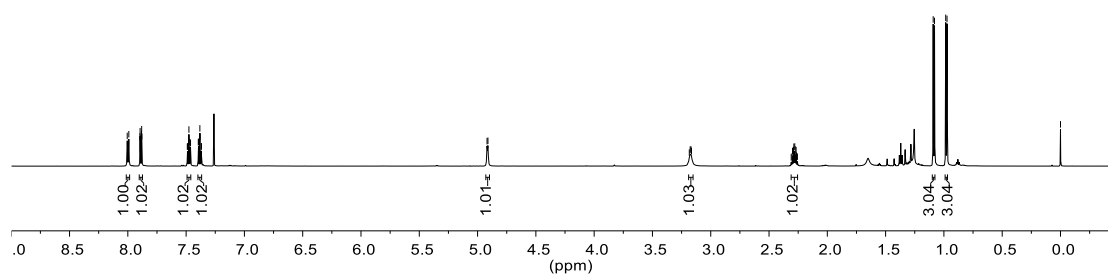

175.207  
152.603  
134.897  
126.037  
124.992  
122.901  
121.775  
35.226  
19.039  
16.288

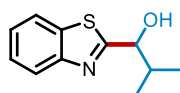

**20**

<sup>13</sup>C NMR

151 MHz, CDCl<sub>3</sub>

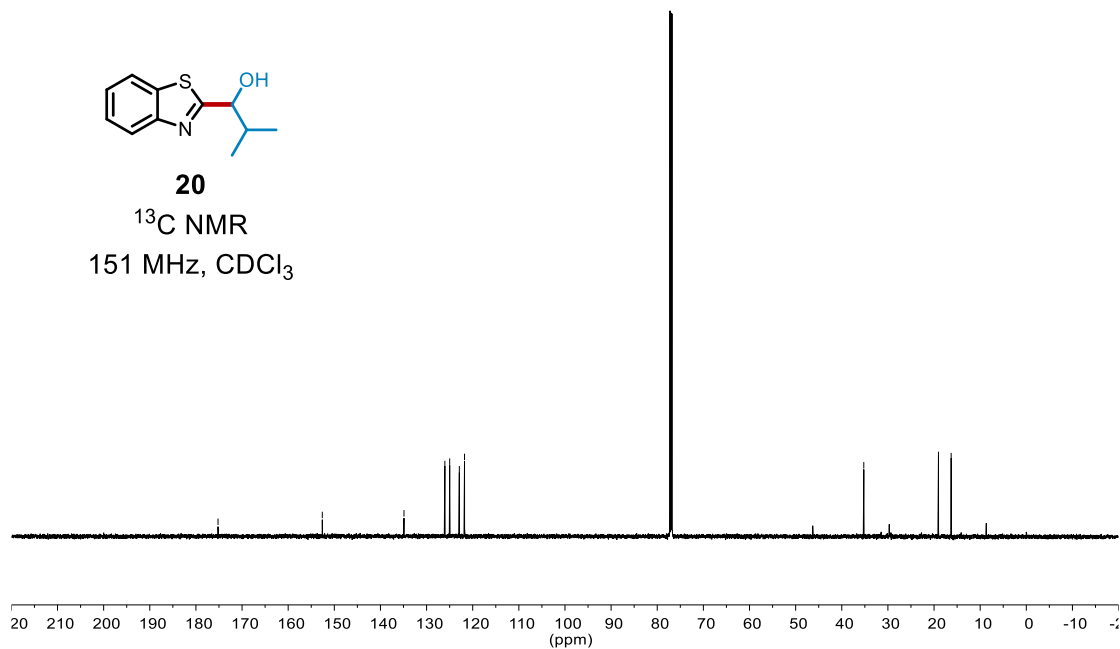



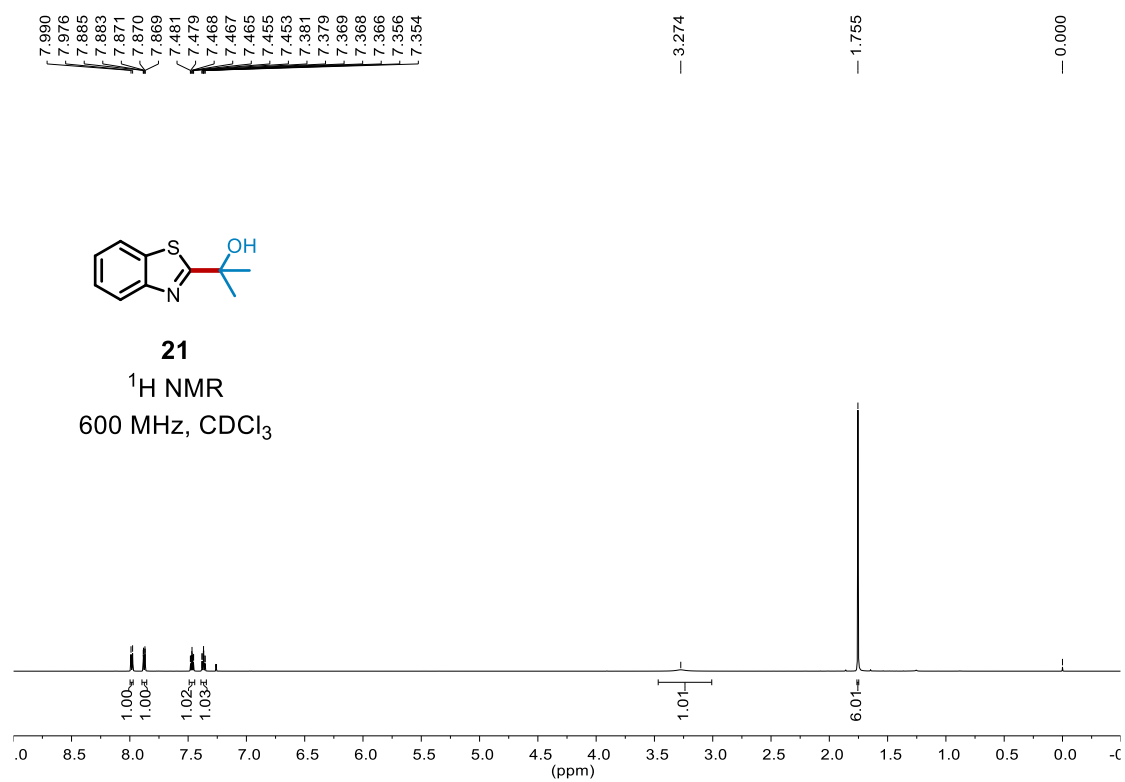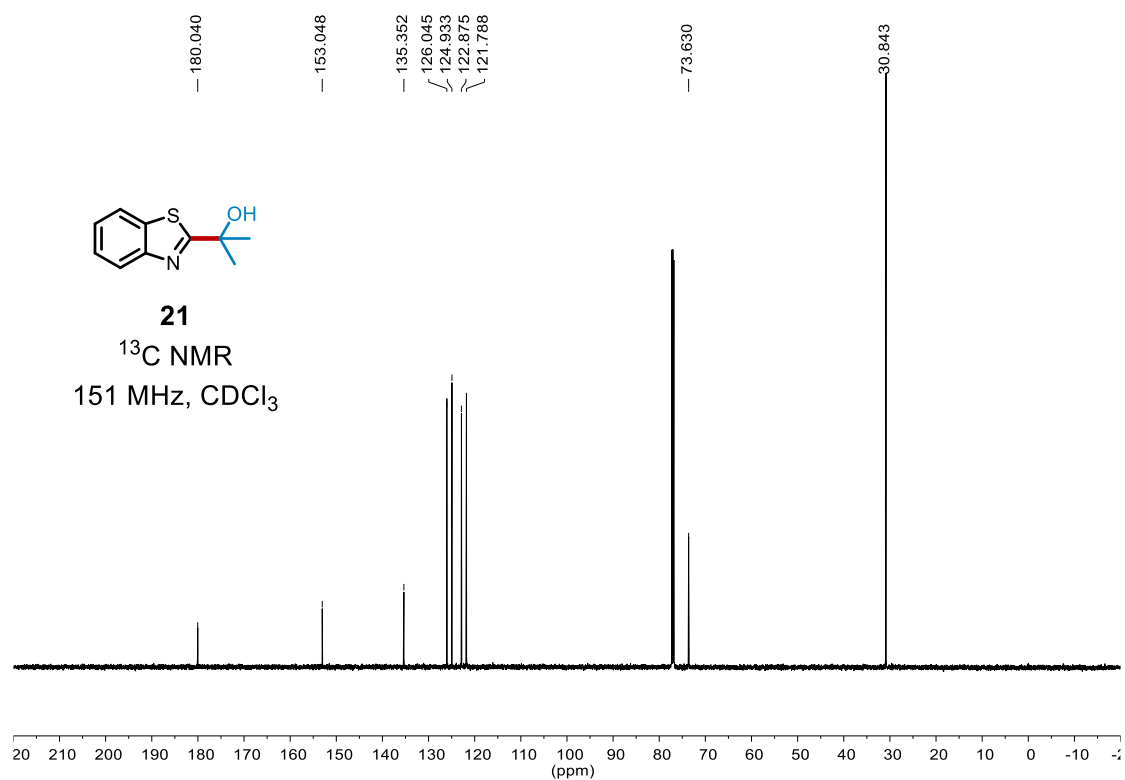

8.004  
7.991  
7.895  
7.893  
7.881  
7.879  
7.494  
7.492  
7.482  
7.480  
7.478  
7.468  
7.466  
7.396  
7.394  
7.383  
7.380  
7.371  
7.369

3.346  
2.097  
2.084  
2.072  
2.060  
2.048  
2.036  
2.032  
2.020  
2.008  
1.996  
1.983  
1.718  
0.945  
0.933  
0.921  
-0.000

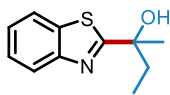

**22**

$^1\text{H}$  NMR  
600 MHz,  $\text{CDCl}_3$

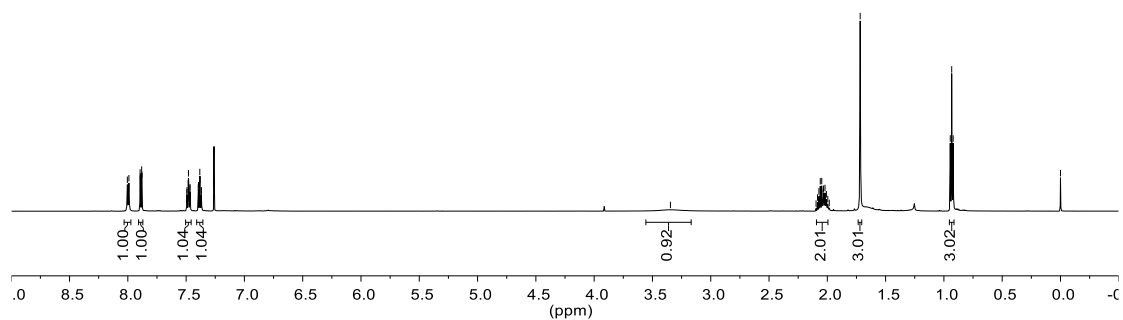

179.381  
152.588  
135.393  
126.105  
124.984  
122.834  
121.792  
36.356  
29.227  
8.001

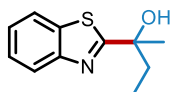

**22**

$^{13}\text{C}$  NMR  
151 MHz,  $\text{CDCl}_3$

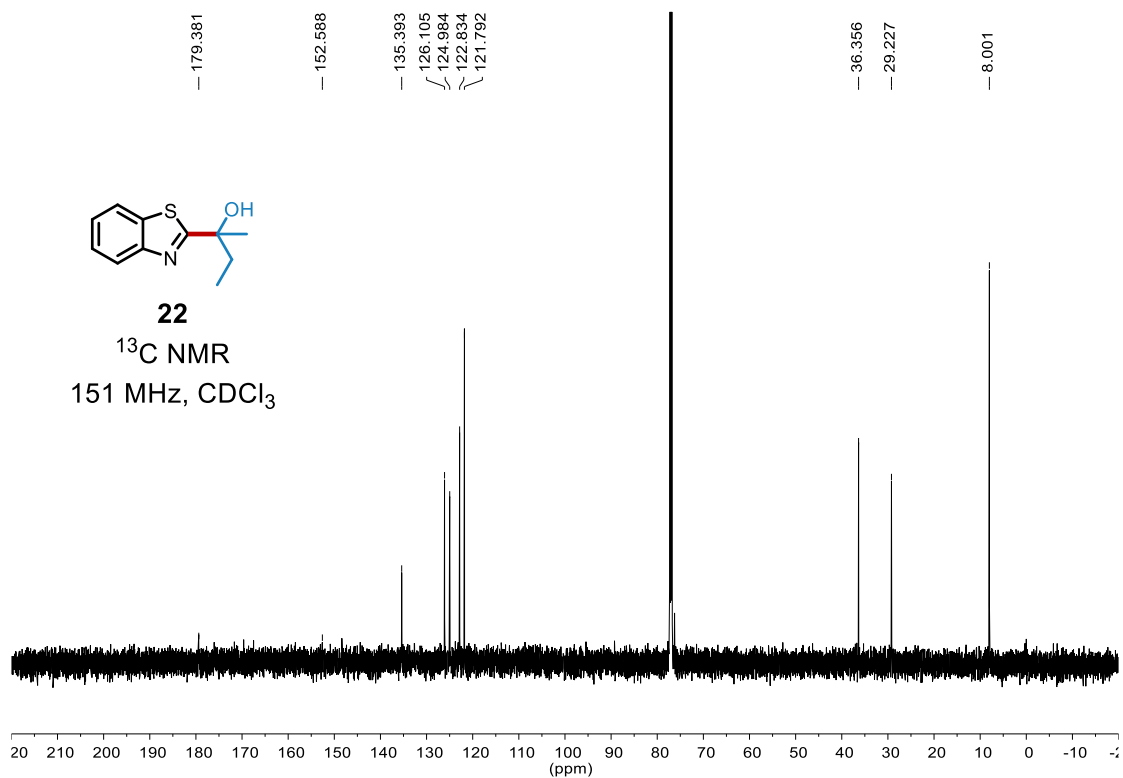

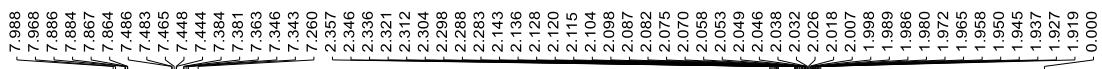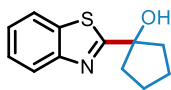

**23**

$^1\text{H}$  NMR  
400 MHz,  $\text{CDCl}_3$

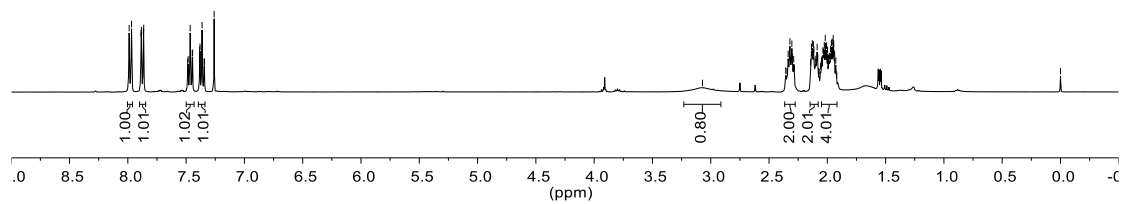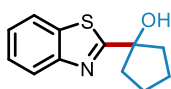

**23**

$^{13}\text{C}$  NMR  
101 MHz,  $\text{CDCl}_3$

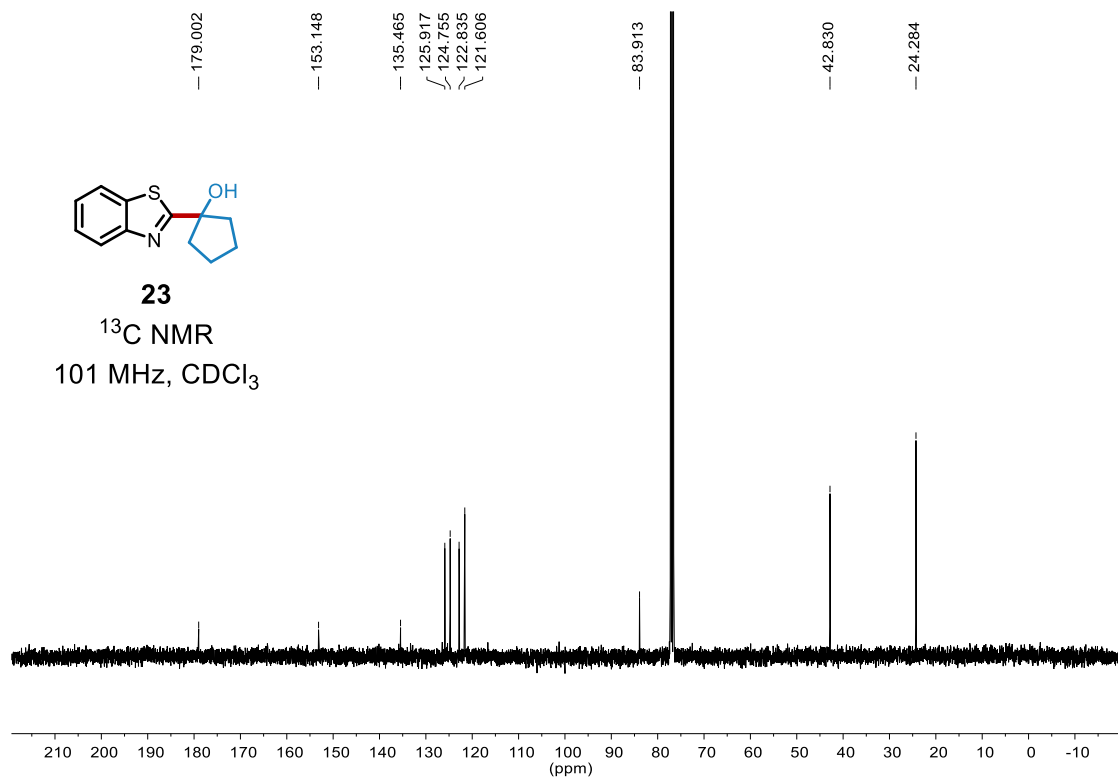

7.991  
7.977  
7.887  
7.885  
7.874  
7.872  
7.476  
7.474  
7.464  
7.462  
7.450  
7.448  
7.374  
7.372  
7.360  
7.348  
2.919  
2.104  
2.096  
2.081  
2.074  
2.060  
2.053  
1.975  
1.971  
1.968  
1.965  
1.960  
1.950  
1.945  
1.942  
1.938  
1.802  
1.797  
1.791  
1.776  
1.771  
1.759  
1.753  
1.747  
1.744  
1.738  
1.733  
1.727  
1.719  
1.711  
1.434  
1.431  
1.426  
1.417  
1.411  
1.405  
1.396  
1.392  
1.386  
0.000

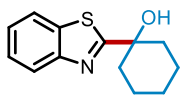

**24**

$^1\text{H}$  NMR  
600 MHz,  $\text{CDCl}_3$

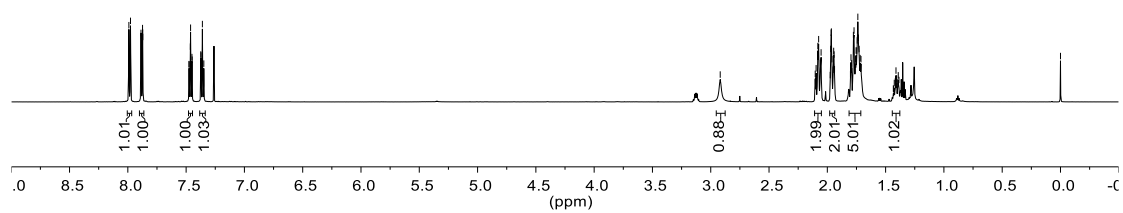

180.688  
153.168  
135.158  
125.944  
124.801  
122.874  
121.780  
74.804  
38.465  
25.127  
21.723

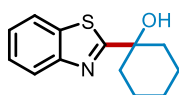

**24**

$^{13}\text{C}$  NMR  
151 MHz,  $\text{CDCl}_3$

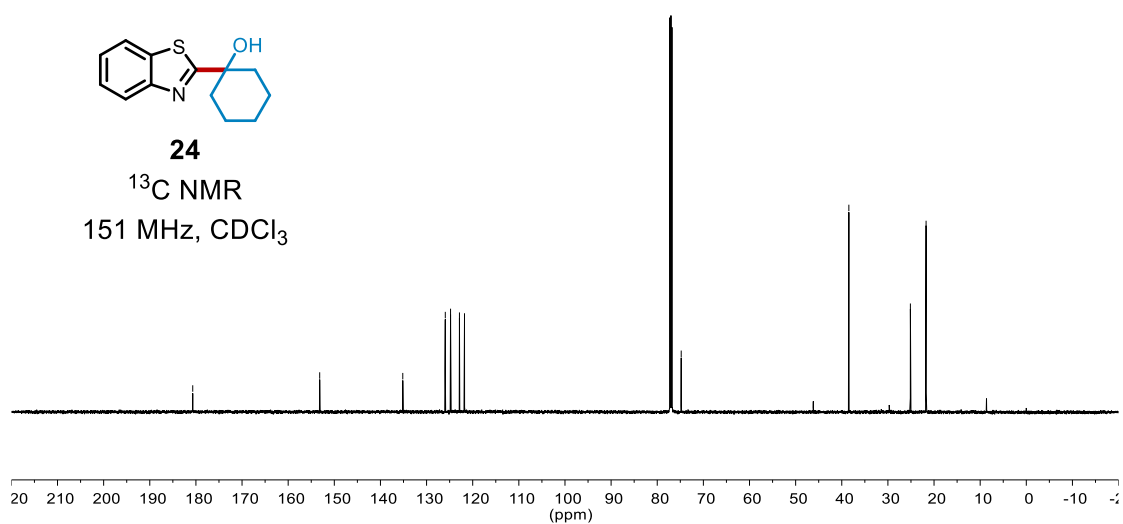

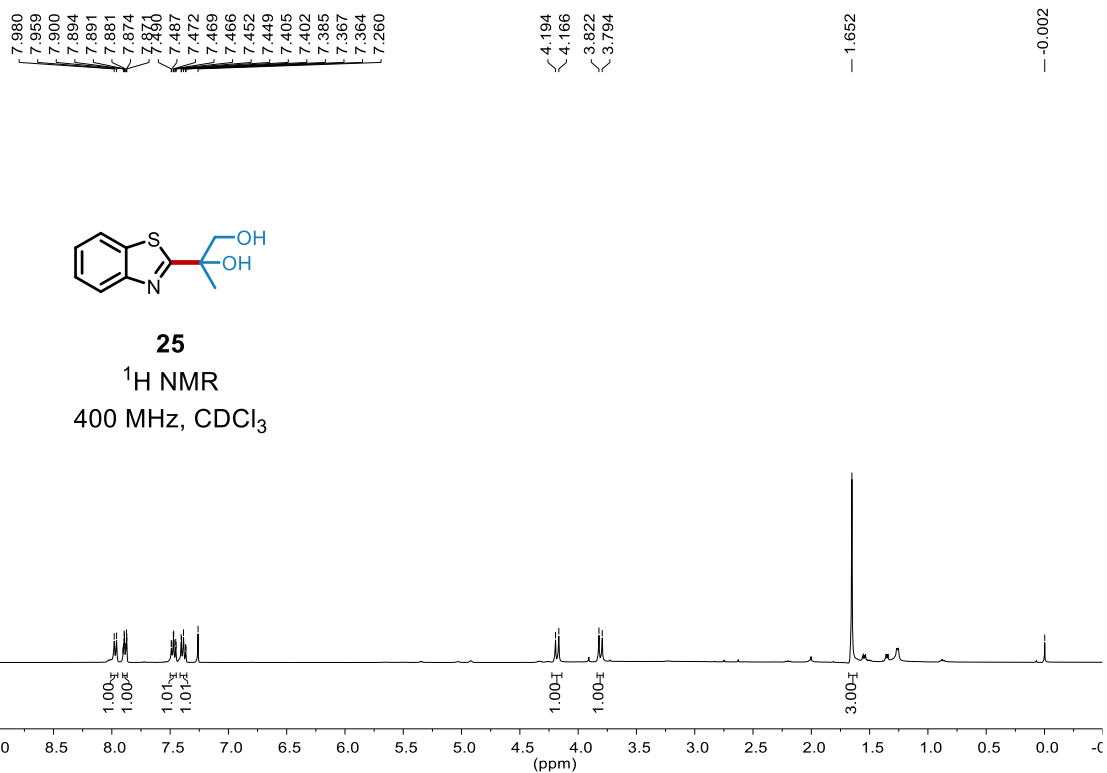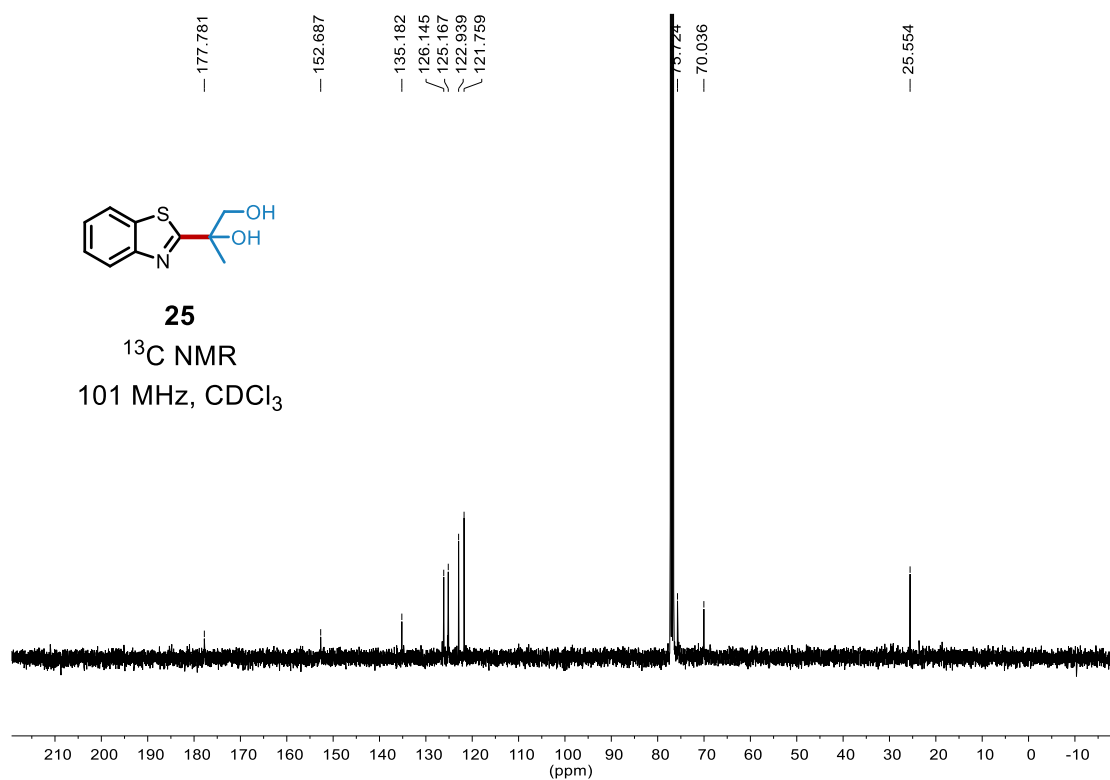

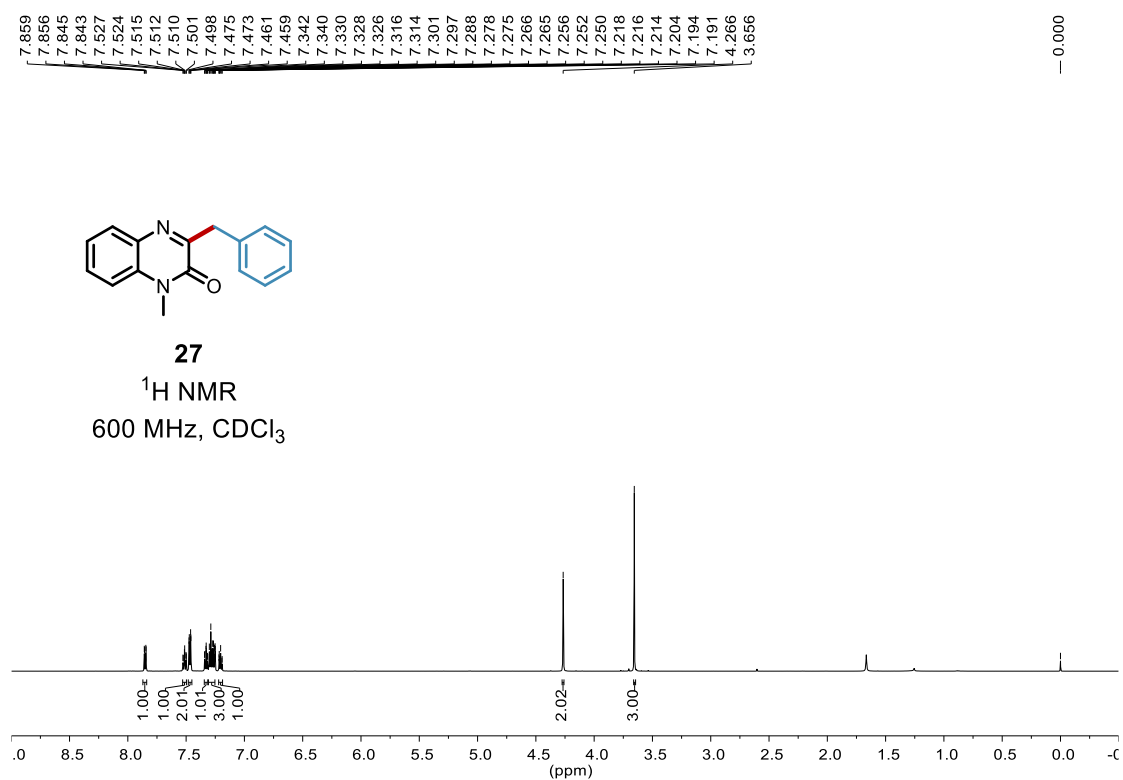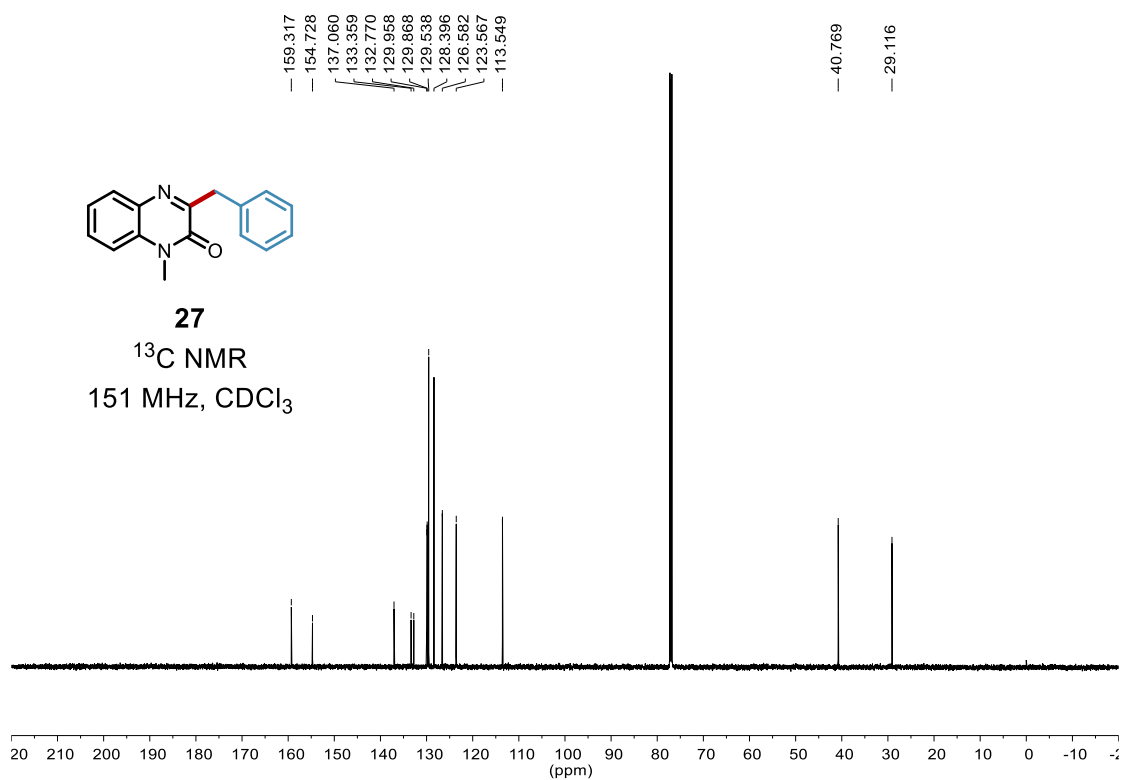

7.930  
7.927  
7.916  
7.914  
7.525  
7.523  
7.513  
7.511  
7.509  
7.499  
7.497  
7.445  
7.442  
7.431  
7.429  
7.357  
7.355  
7.344  
7.342  
7.332  
7.330  
7.282  
7.270  
7.262  
7.260  
7.257  
7.255  
7.248  
7.246  
7.189  
7.187  
7.185  
7.175  
7.163  
4.842  
4.830  
4.819  
4.807  
3.624

1.690  
1.678

-0.000

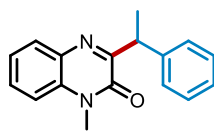

**28**

<sup>1</sup>H NMR  
600 MHz, CDCl<sub>3</sub>

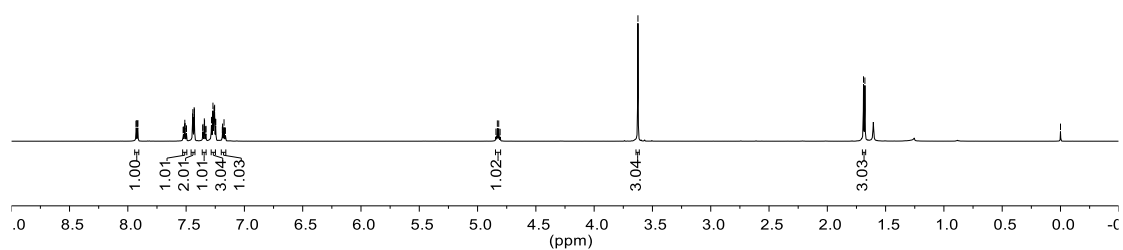

161.888  
154.437  
143.140  
133.091  
132.736  
130.140  
129.703  
128.359  
128.128  
126.498  
123.431  
113.468

41.861

29.093

19.672

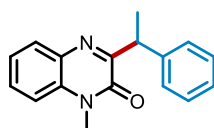

**28**

<sup>13</sup>C NMR  
151 MHz, CDCl<sub>3</sub>

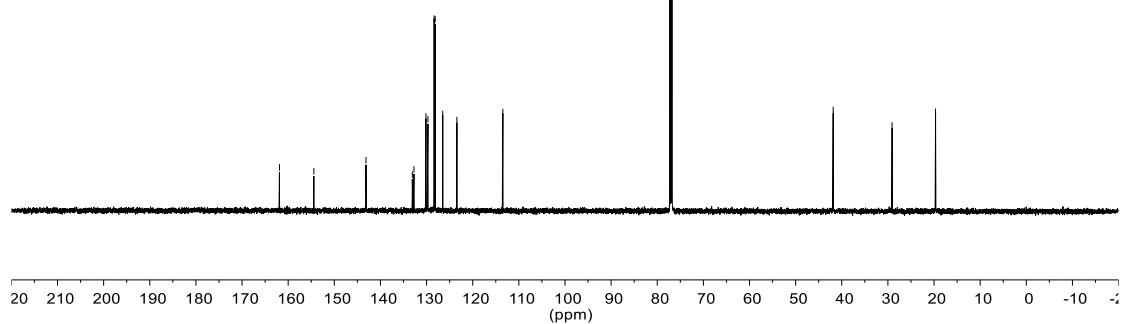

7.931  
7.929  
7.918  
7.915  
7.915  
7.921  
7.519  
7.509  
7.507  
7.505  
7.495  
7.493  
7.460  
7.457  
7.446  
7.444  
7.356  
7.354  
7.344  
7.342  
7.341  
7.330  
7.329  
7.275  
7.262  
7.256  
7.249  
7.243  
7.241  
7.184  
7.182  
7.180  
7.173  
7.170  
7.167  
7.160  
7.158  
7.156  
4.596  
4.583  
4.570  
3.623  
2.339  
2.327  
2.317  
2.315  
2.304  
2.292  
2.292  
2.117  
2.104  
2.094  
2.082  
2.081  
2.069  
0.930  
0.918  
0.906  
-0.000

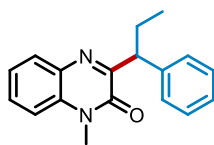

**29**

$^1\text{H}$  NMR  
600 MHz,  $\text{CDCl}_3$

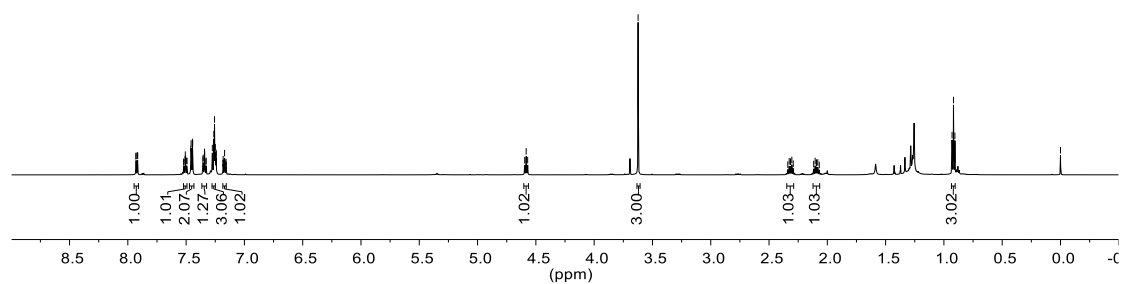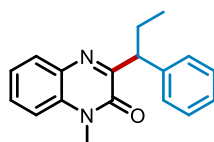

**29**

$^{13}\text{C}$  NMR  
151 MHz,  $\text{CDCl}_3$

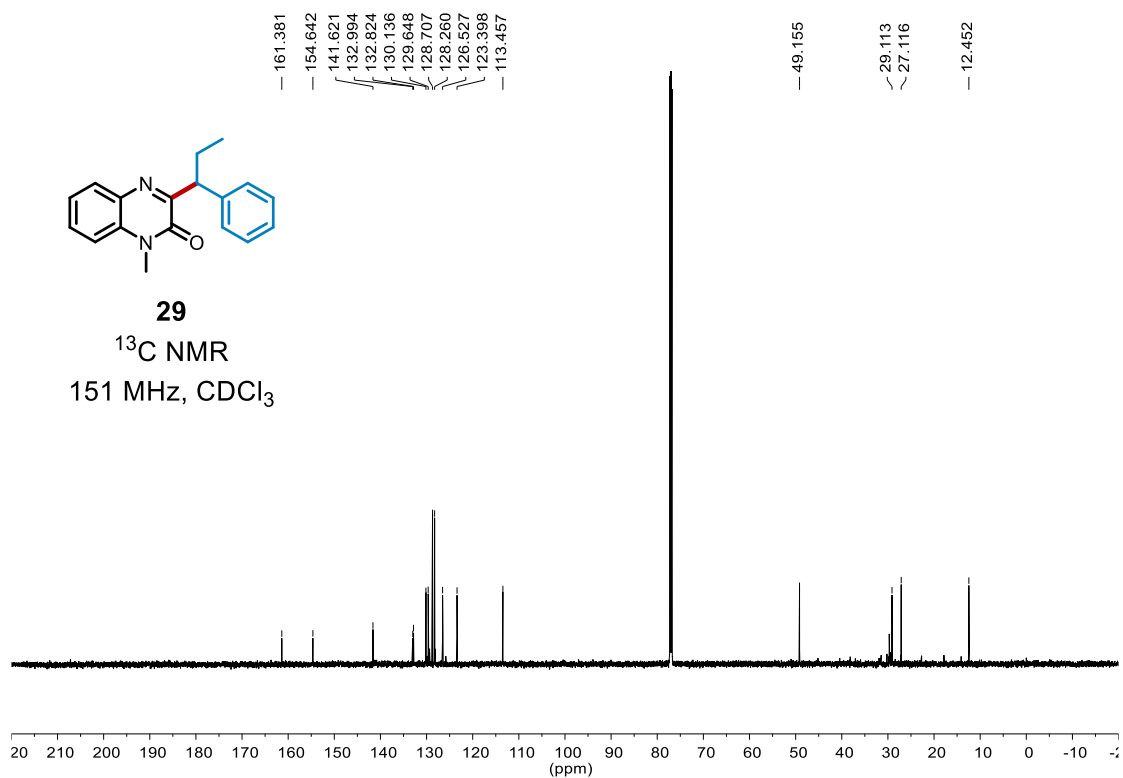



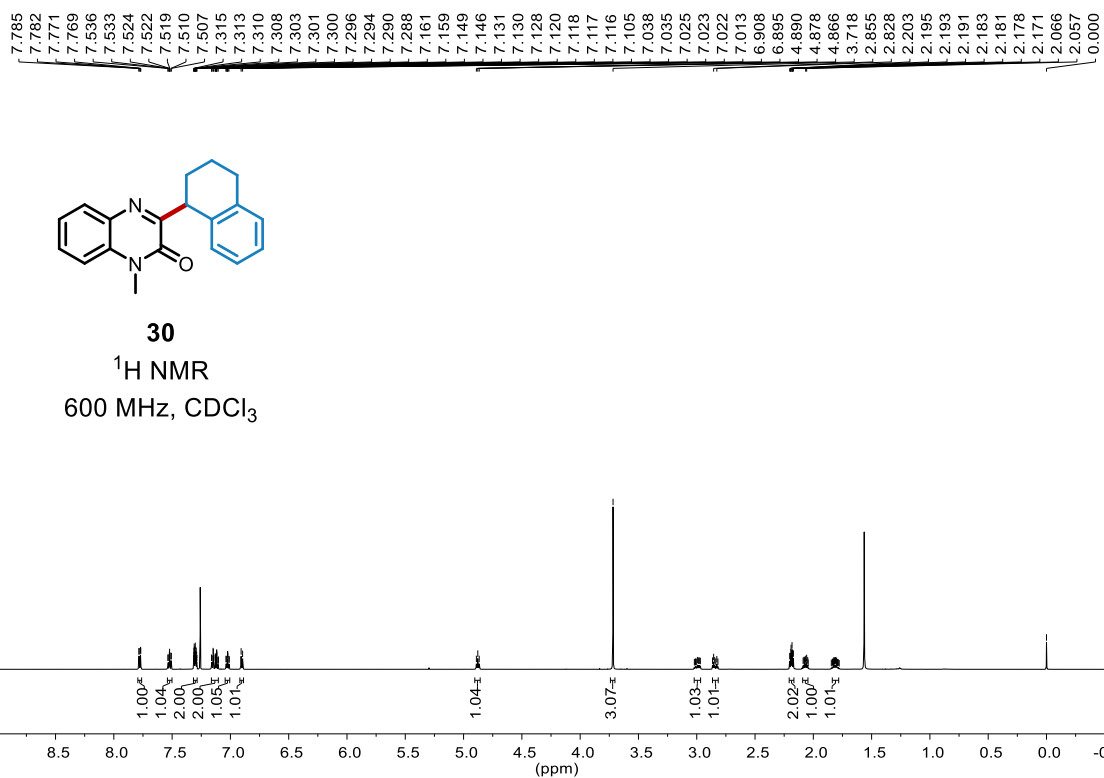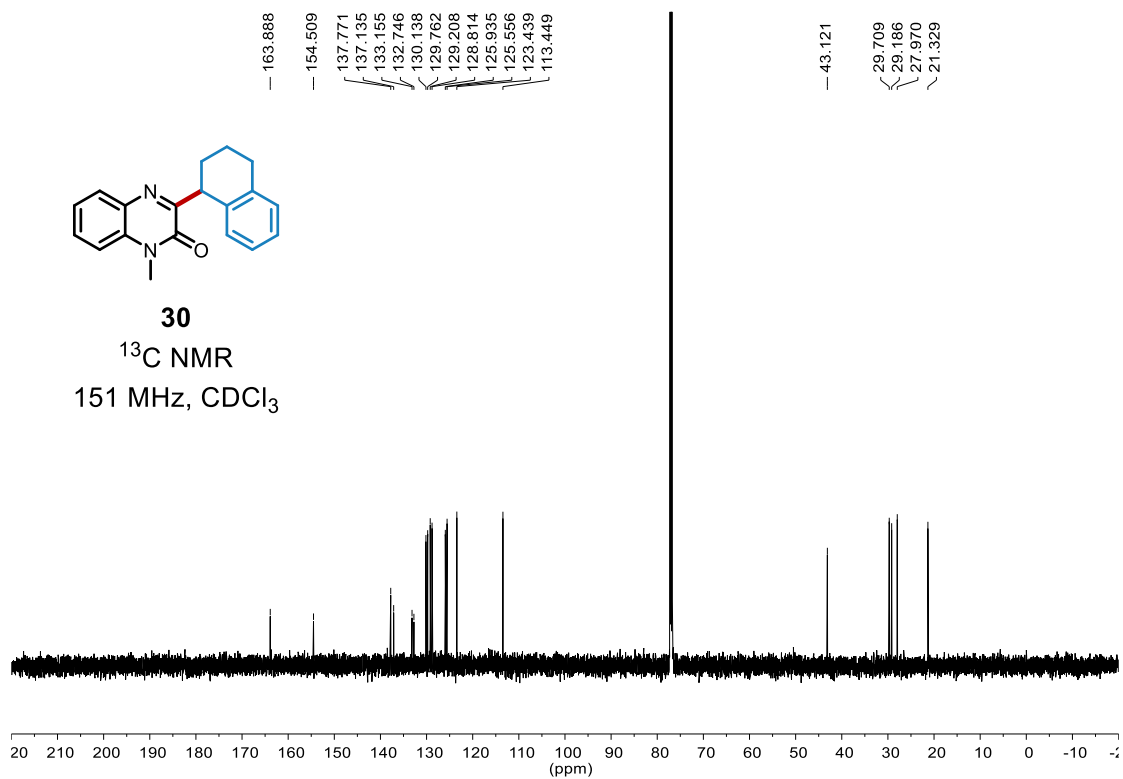

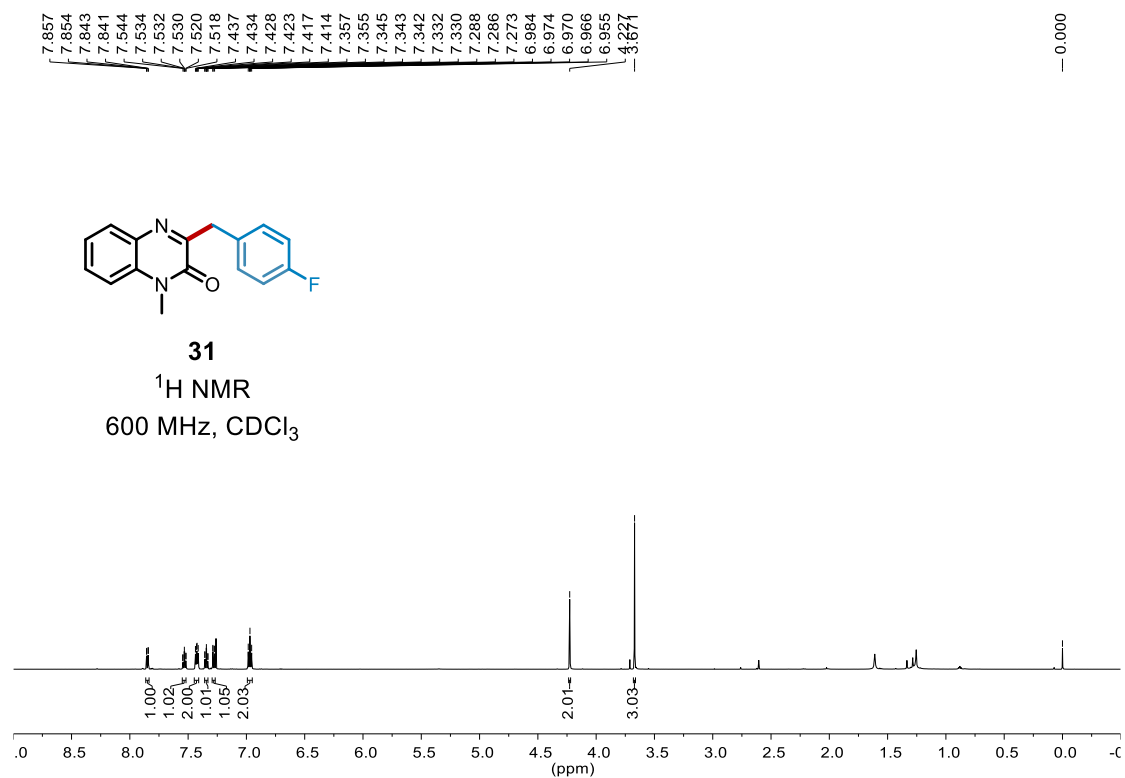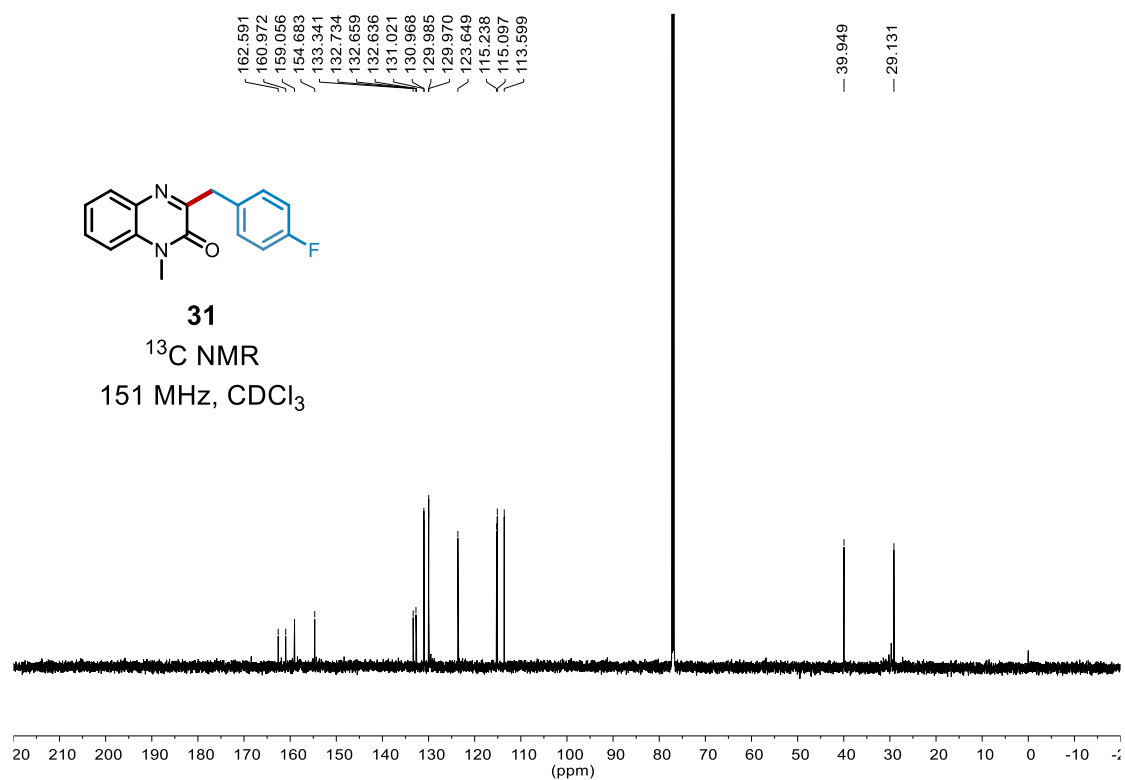

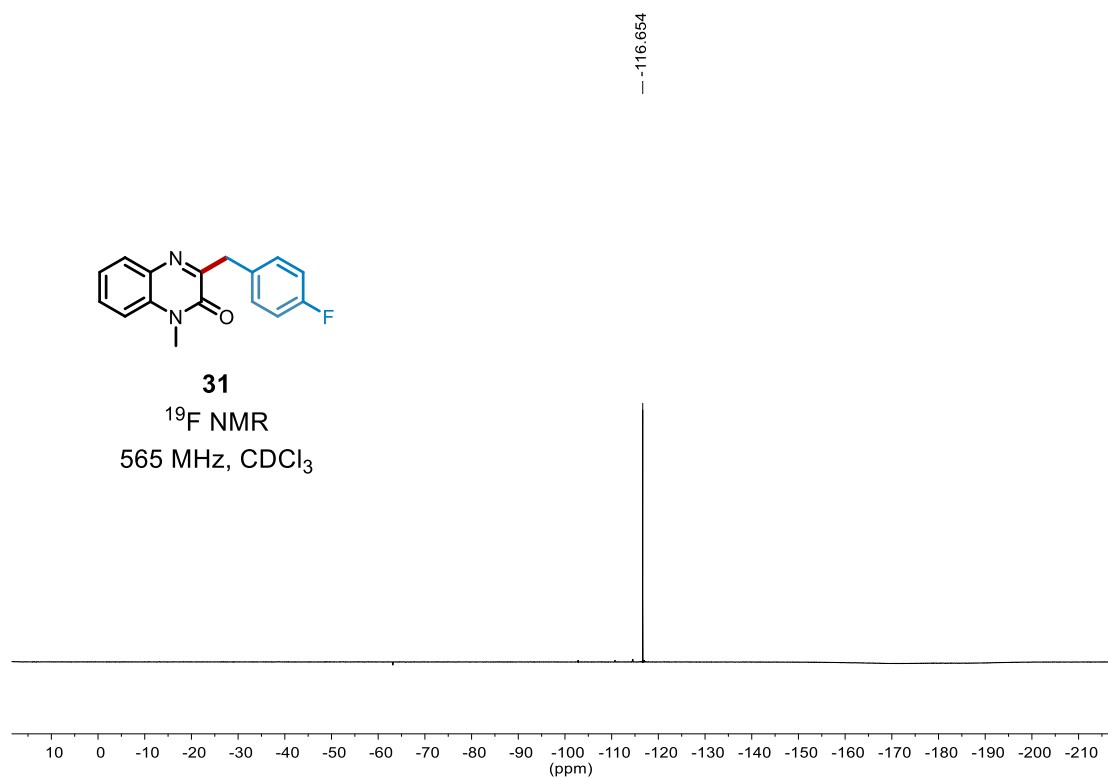

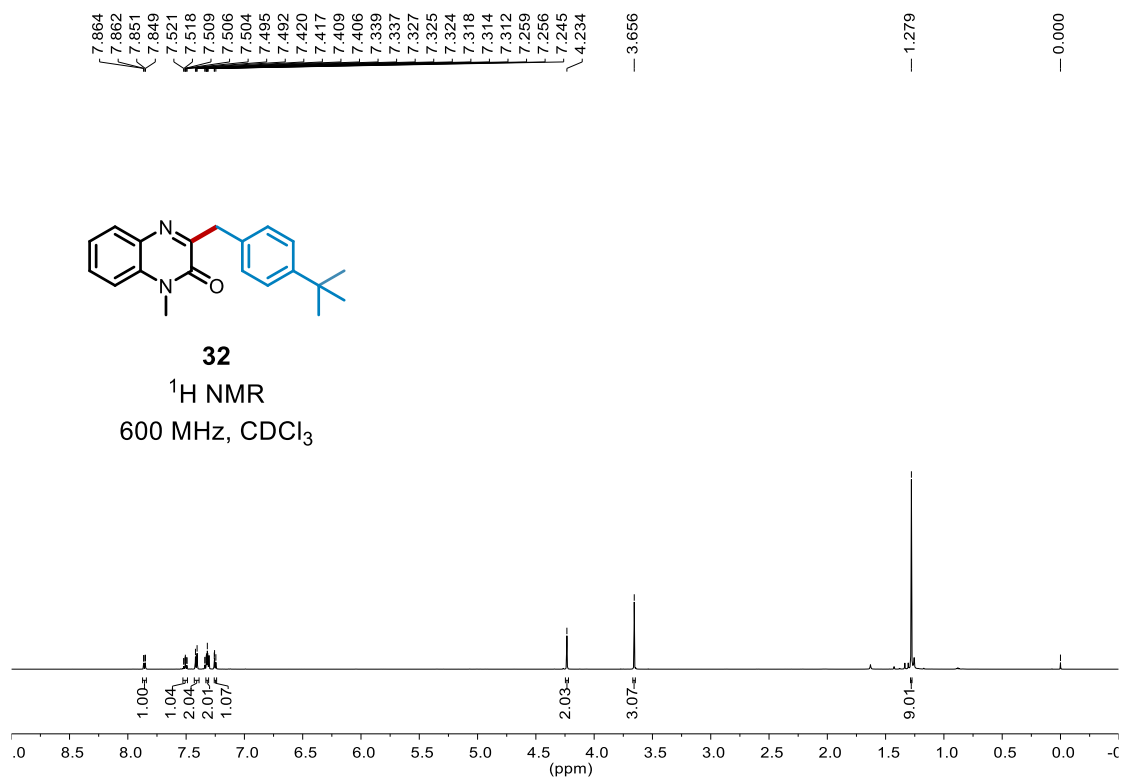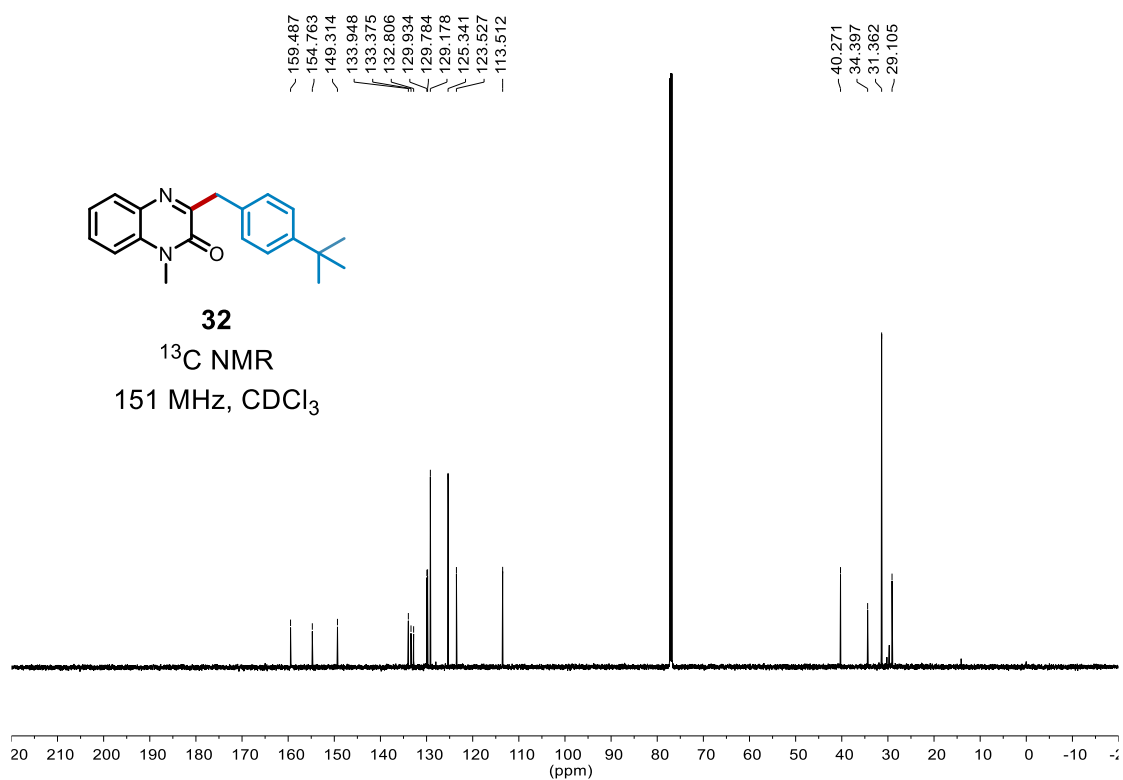

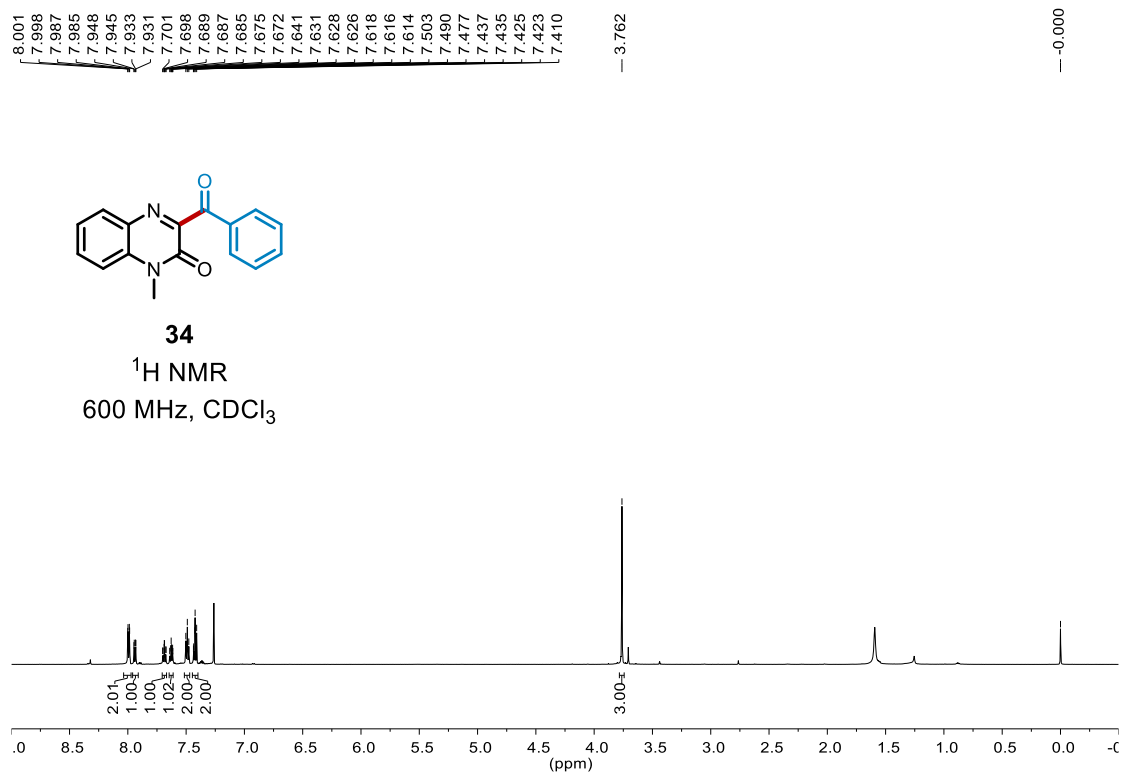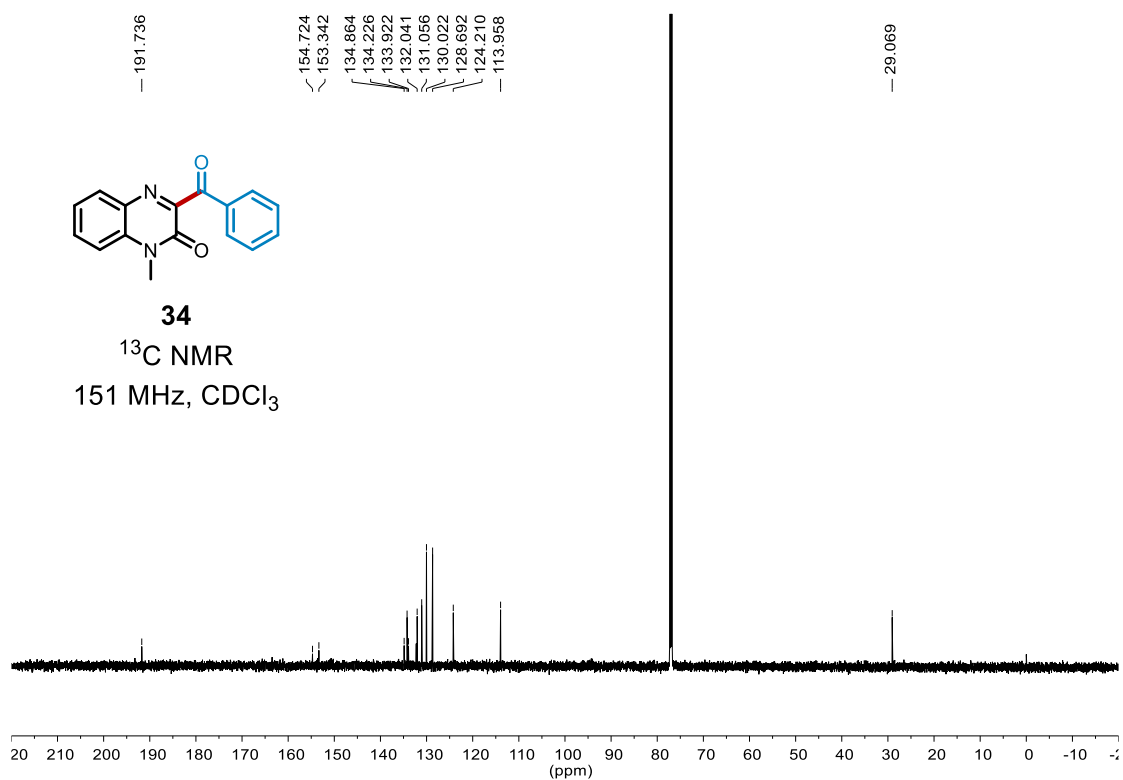

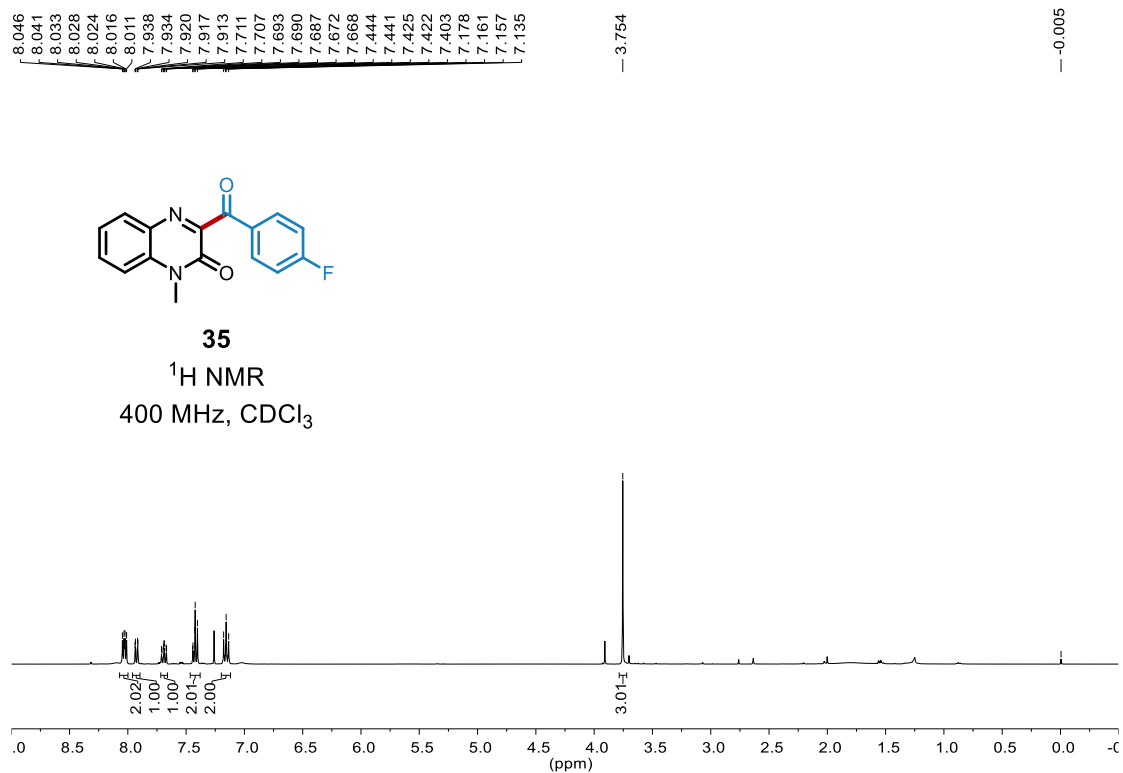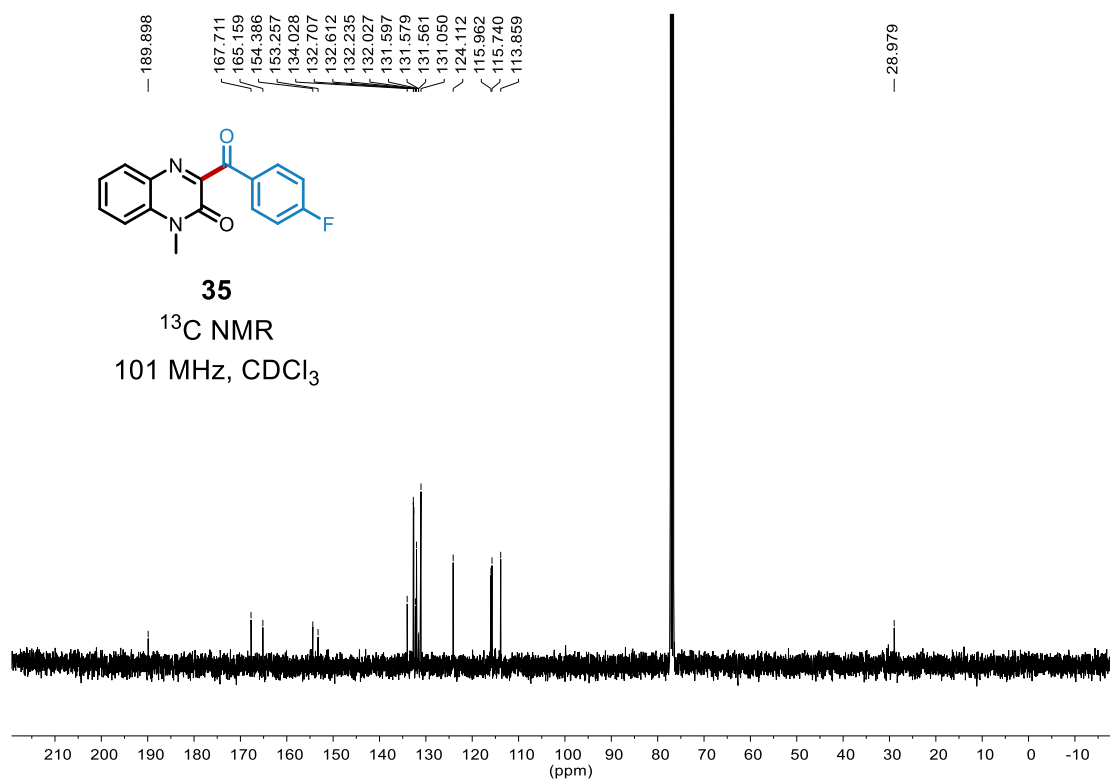

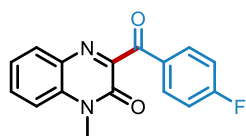

**35**

<sup>19</sup>F NMR

565 MHz, CDCl<sub>3</sub>

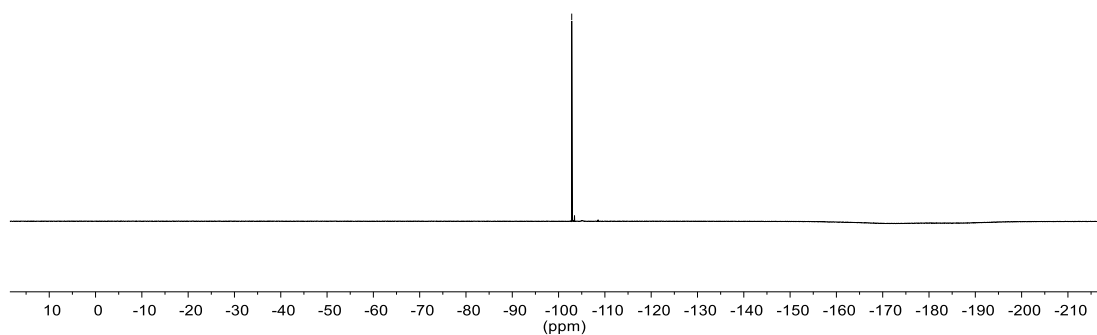

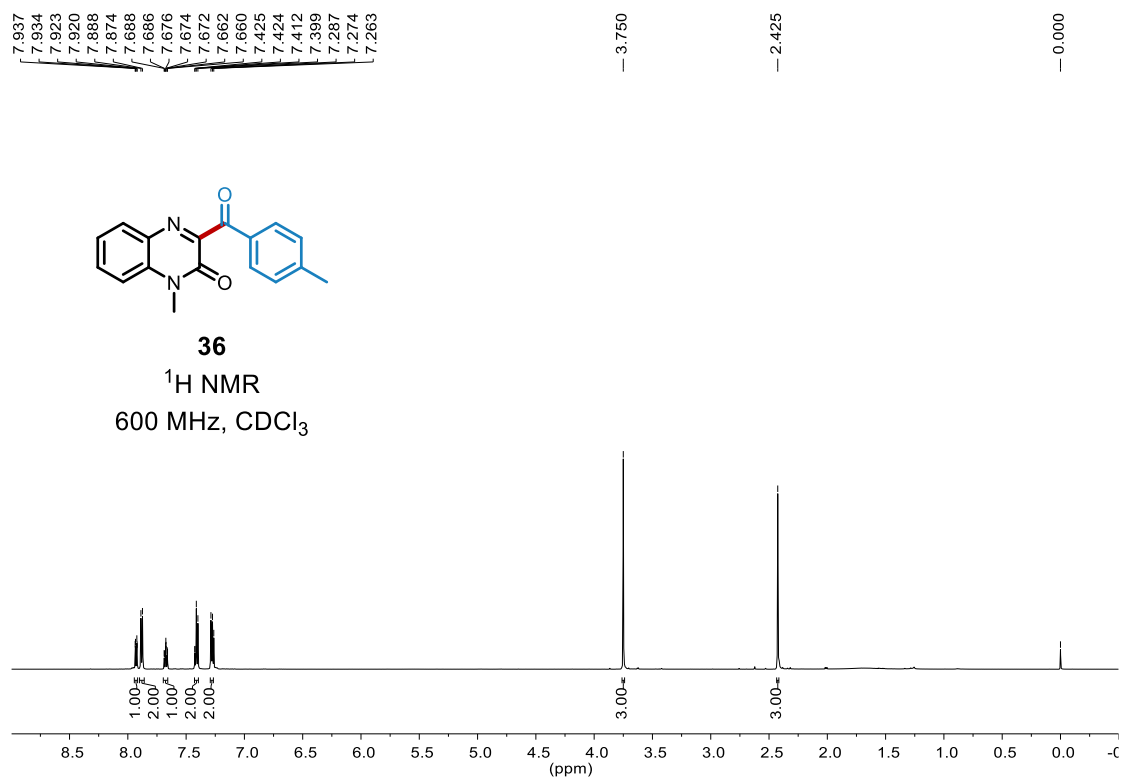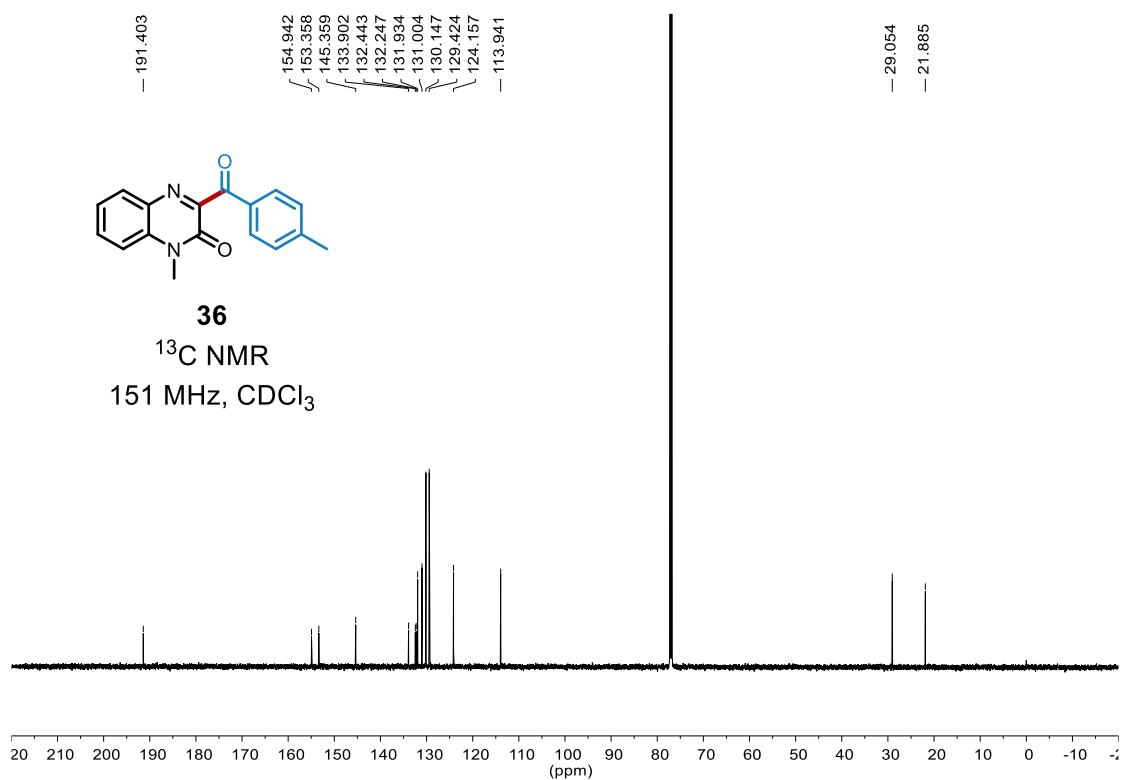



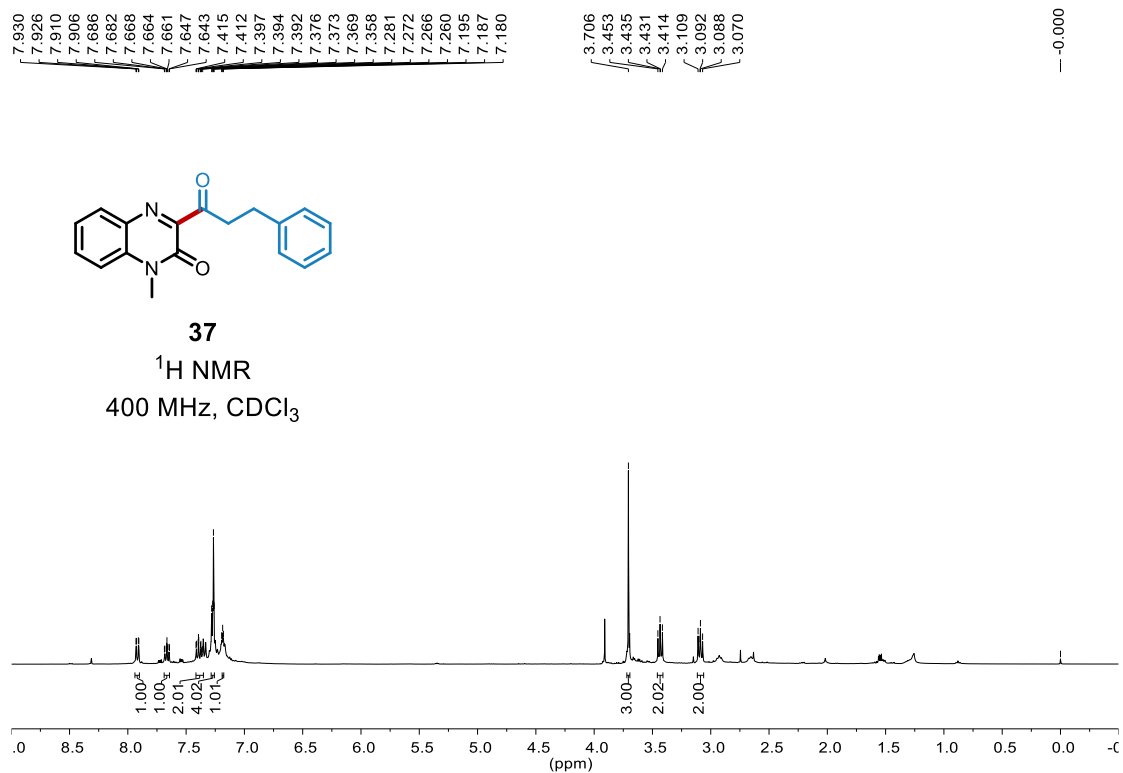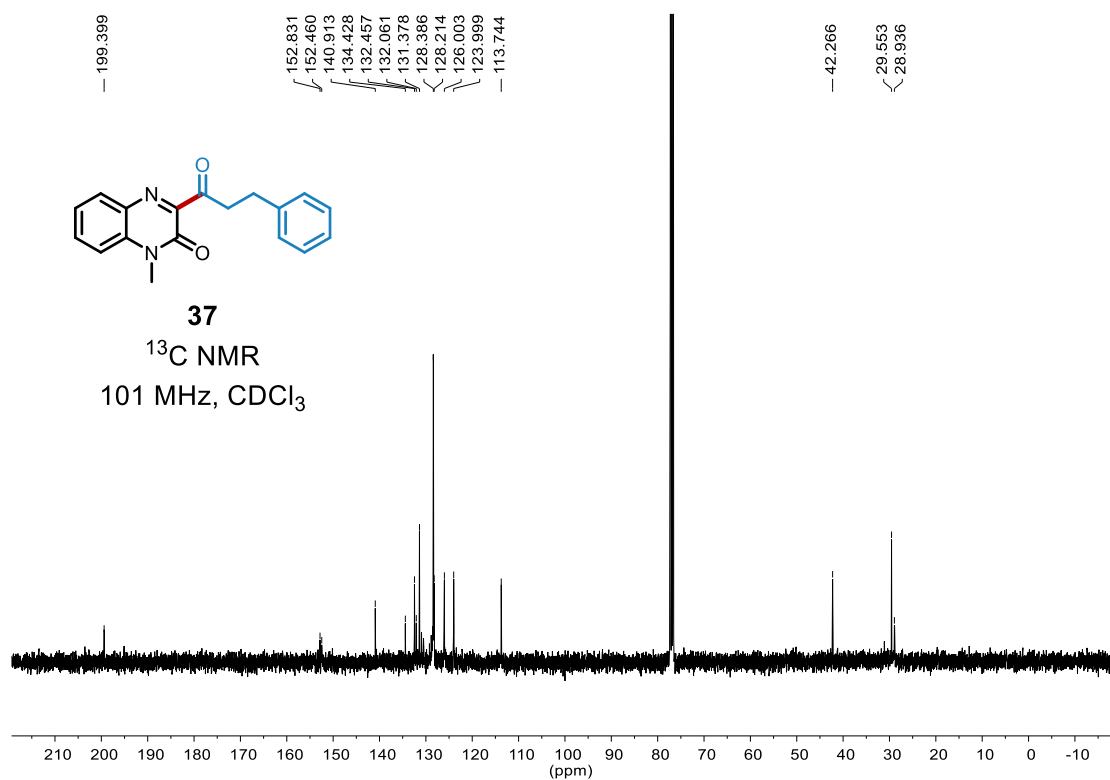

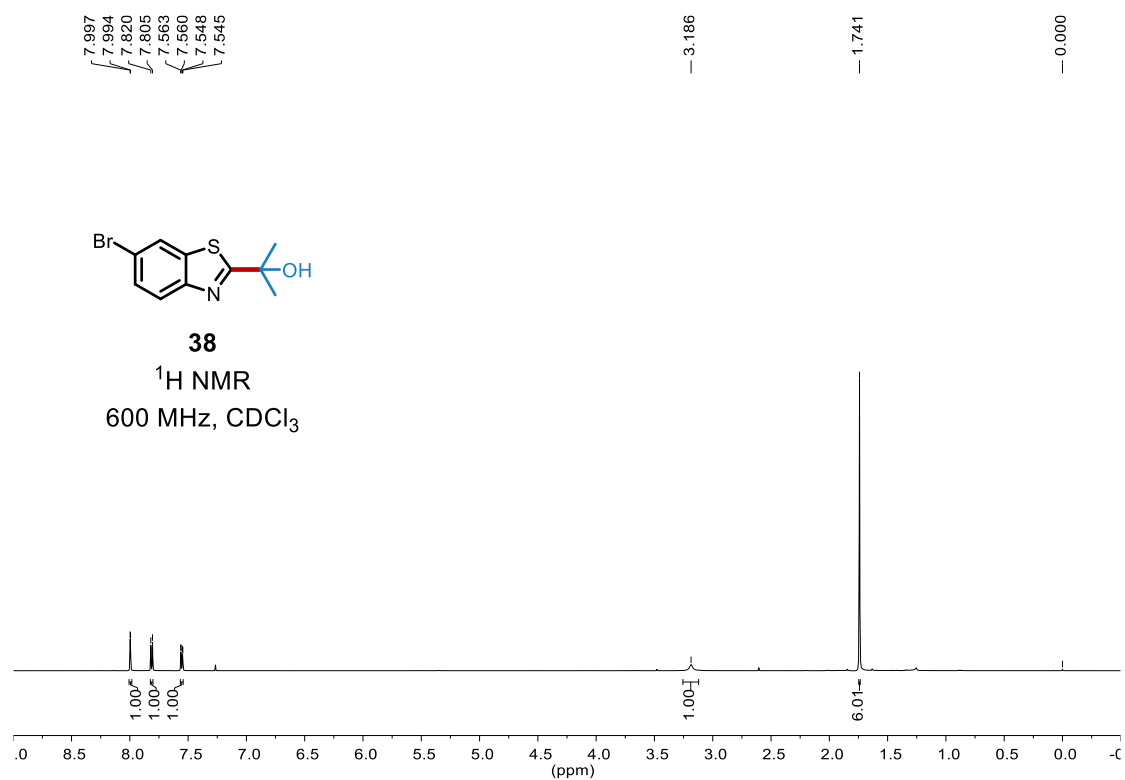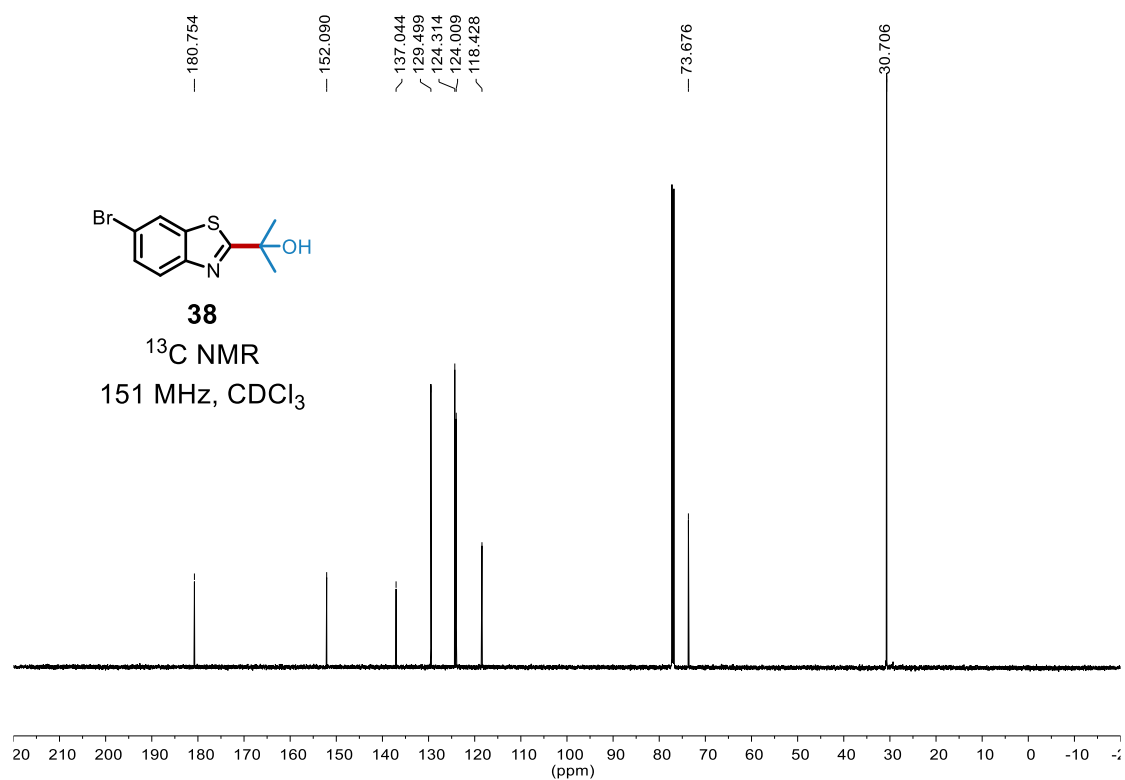

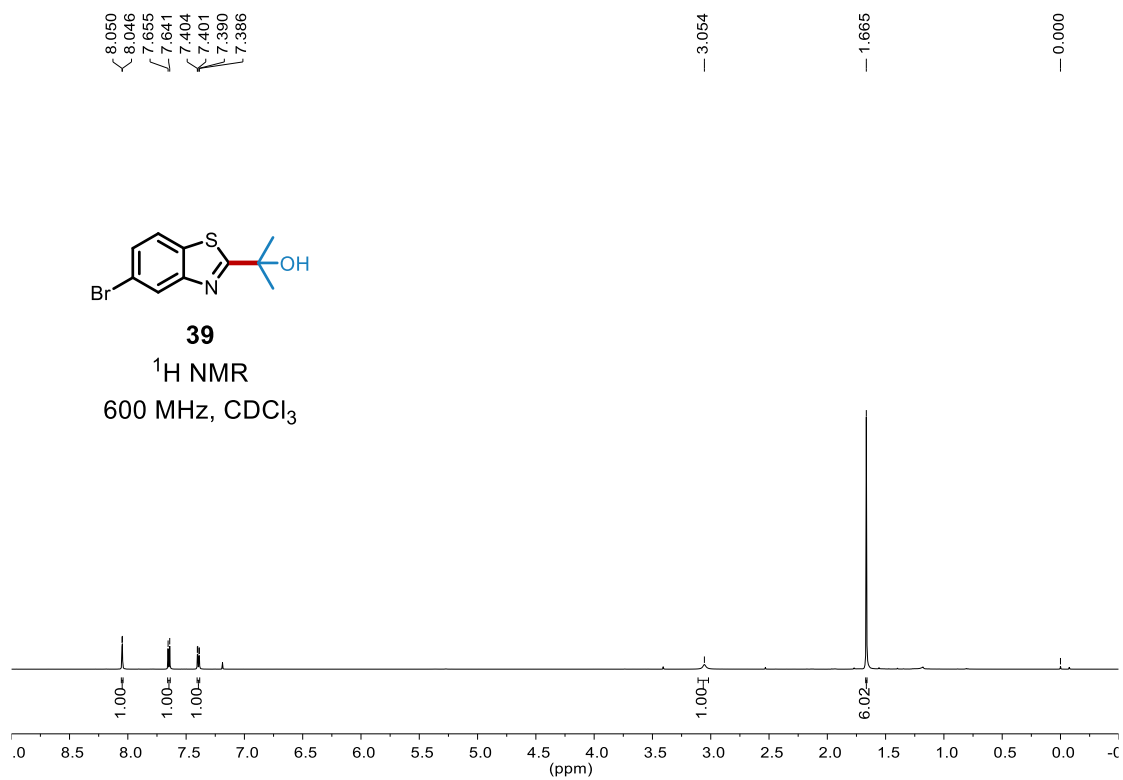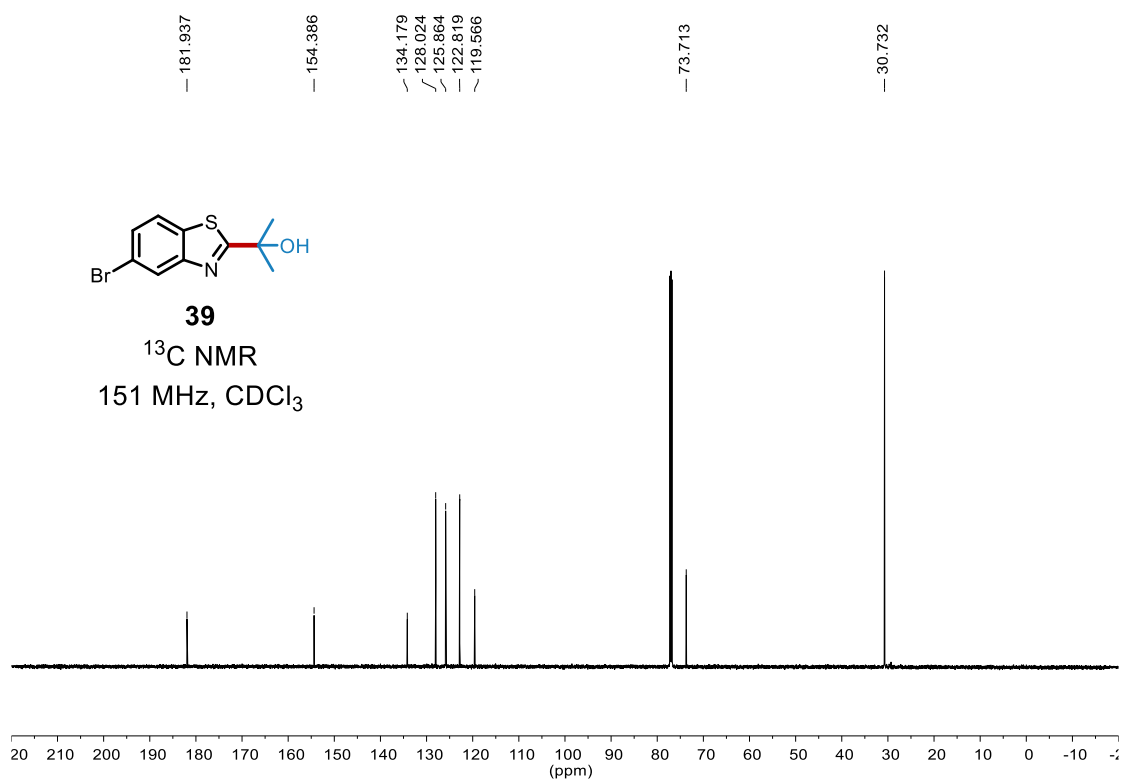

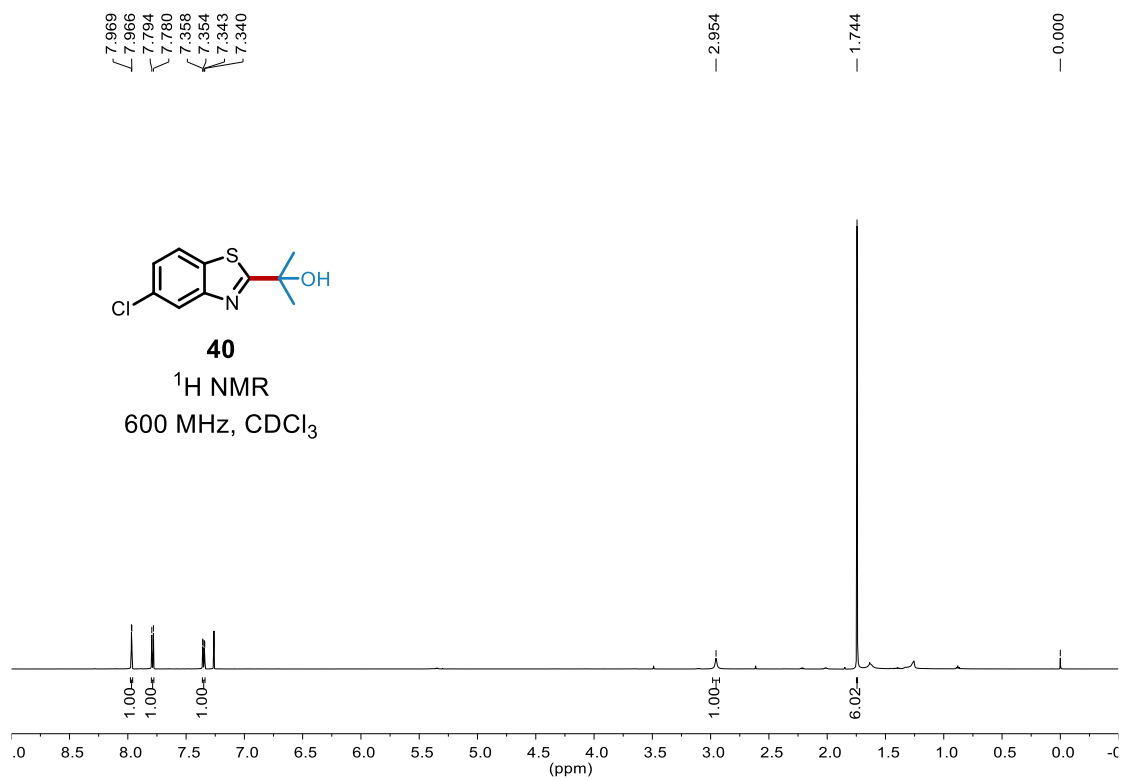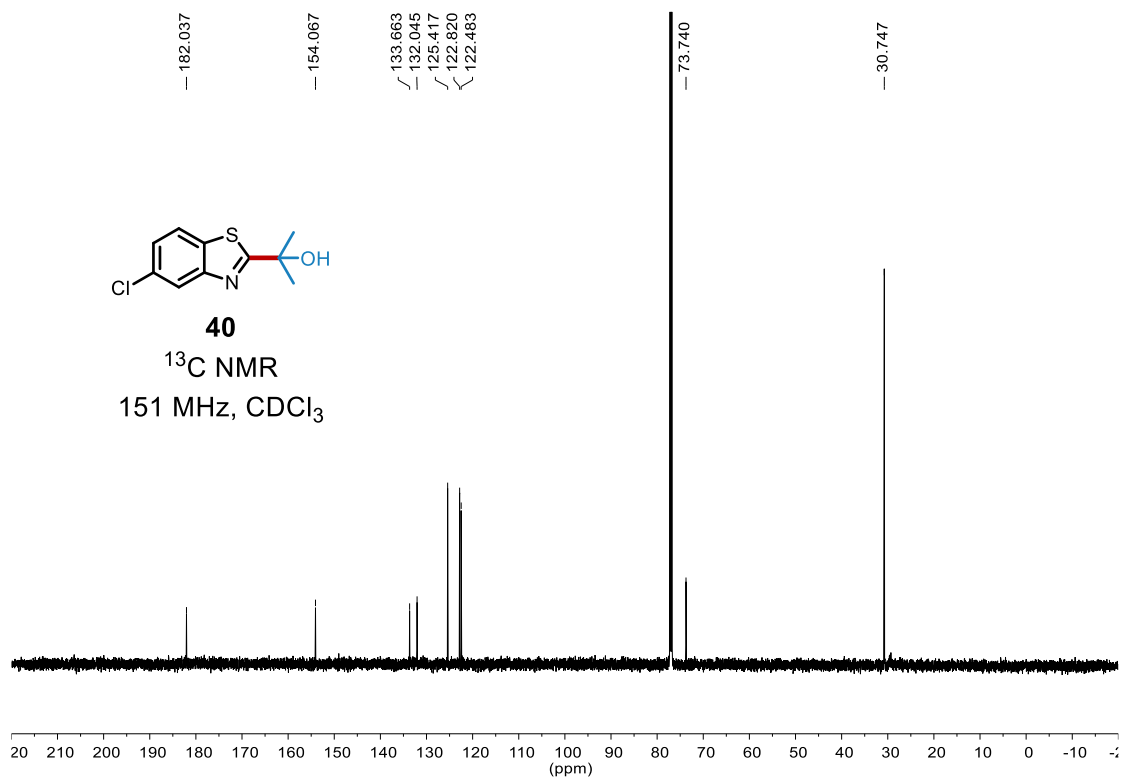

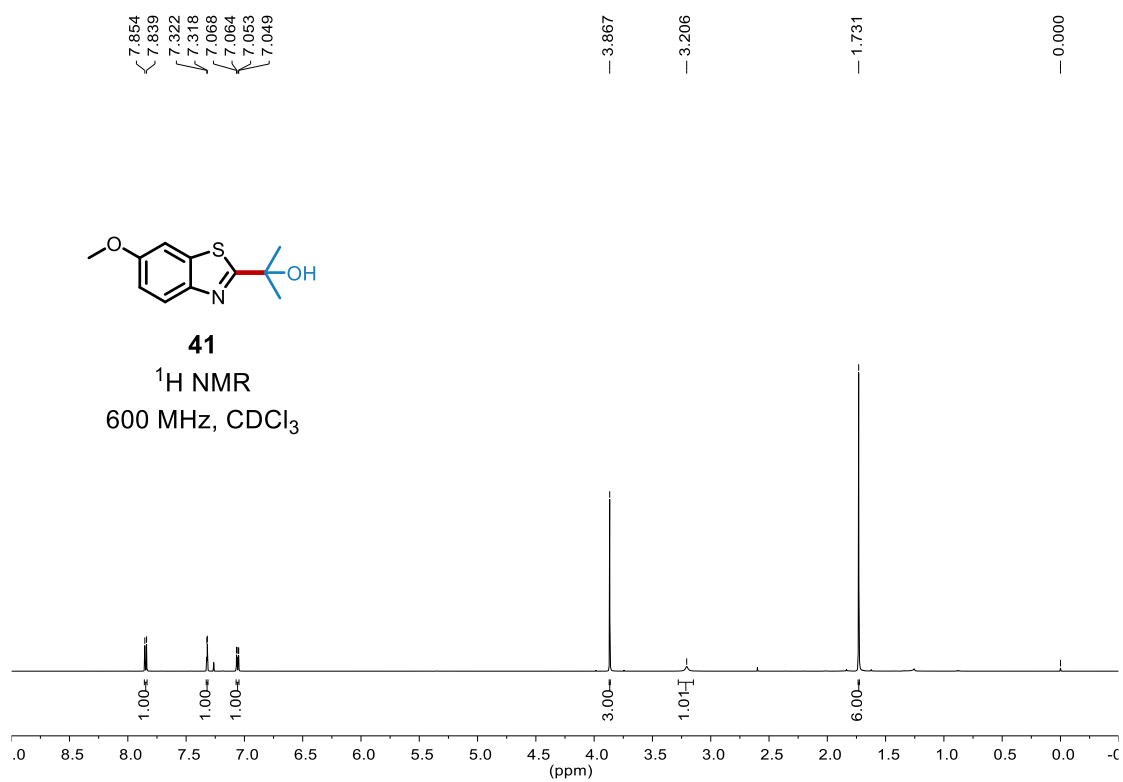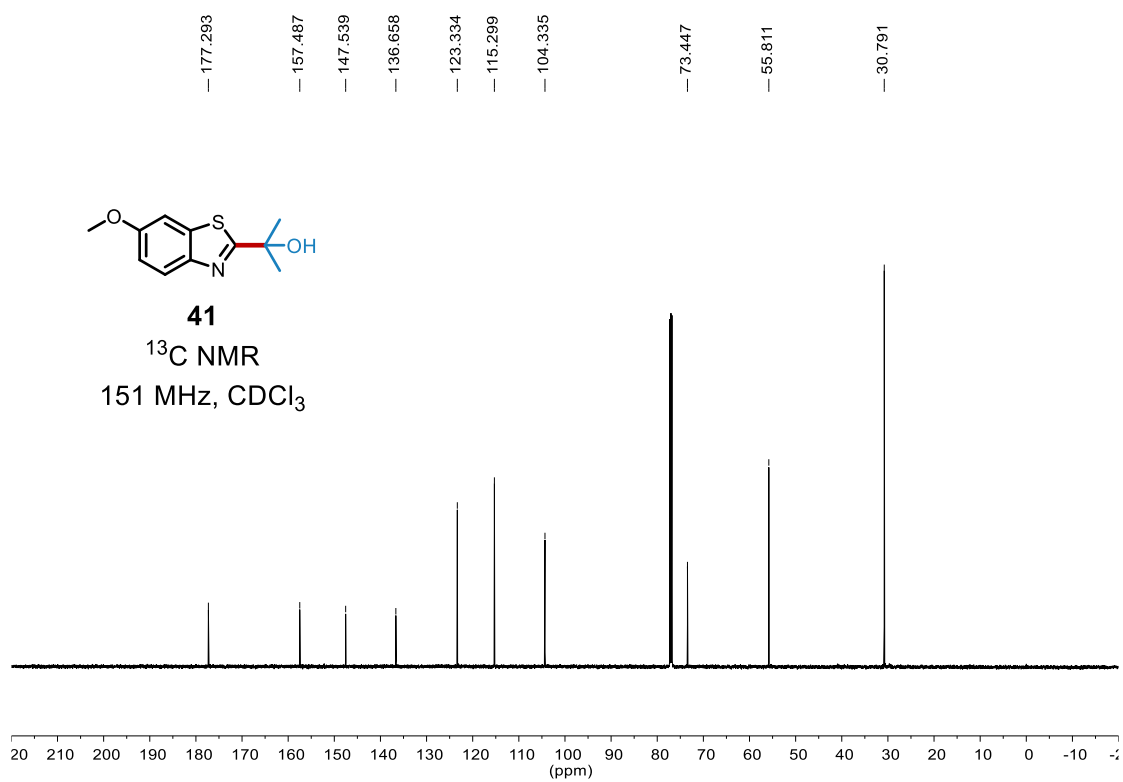

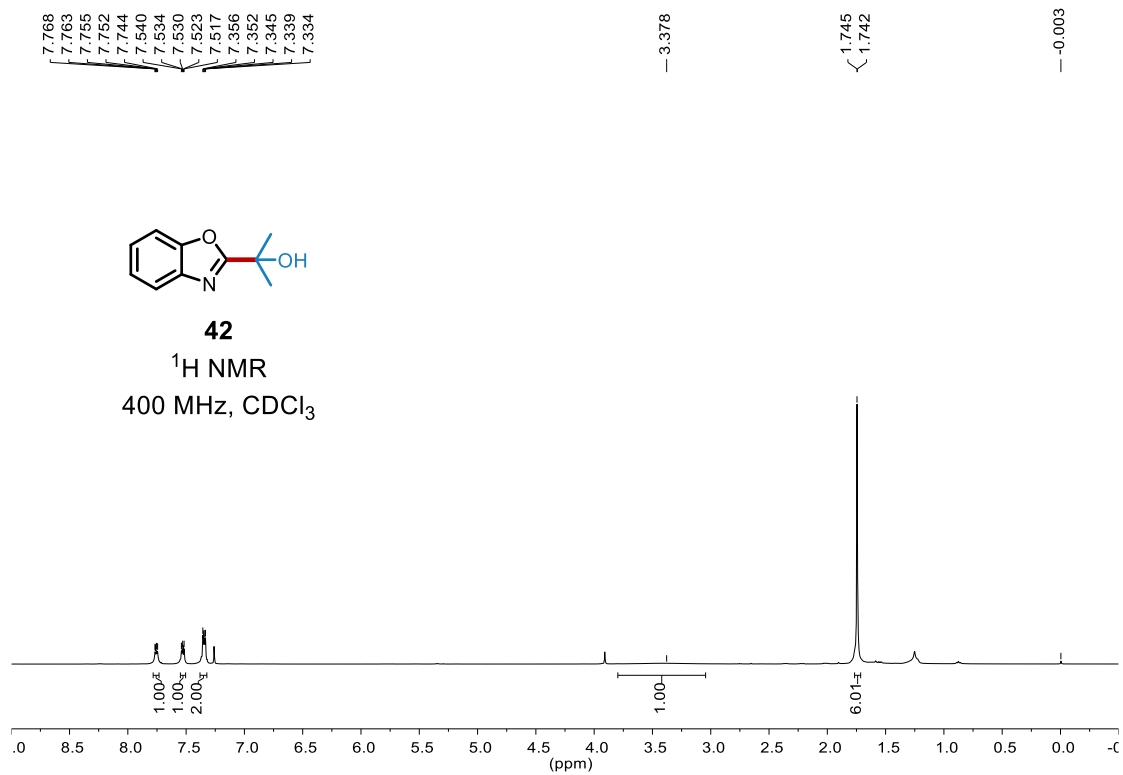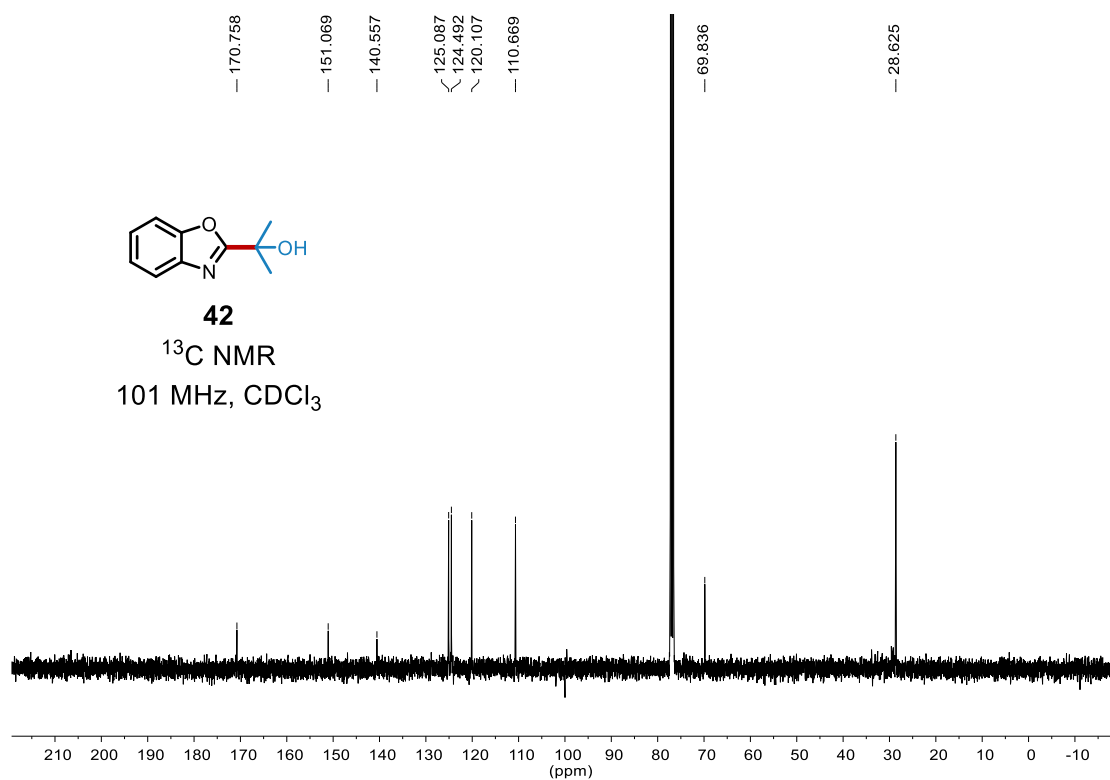

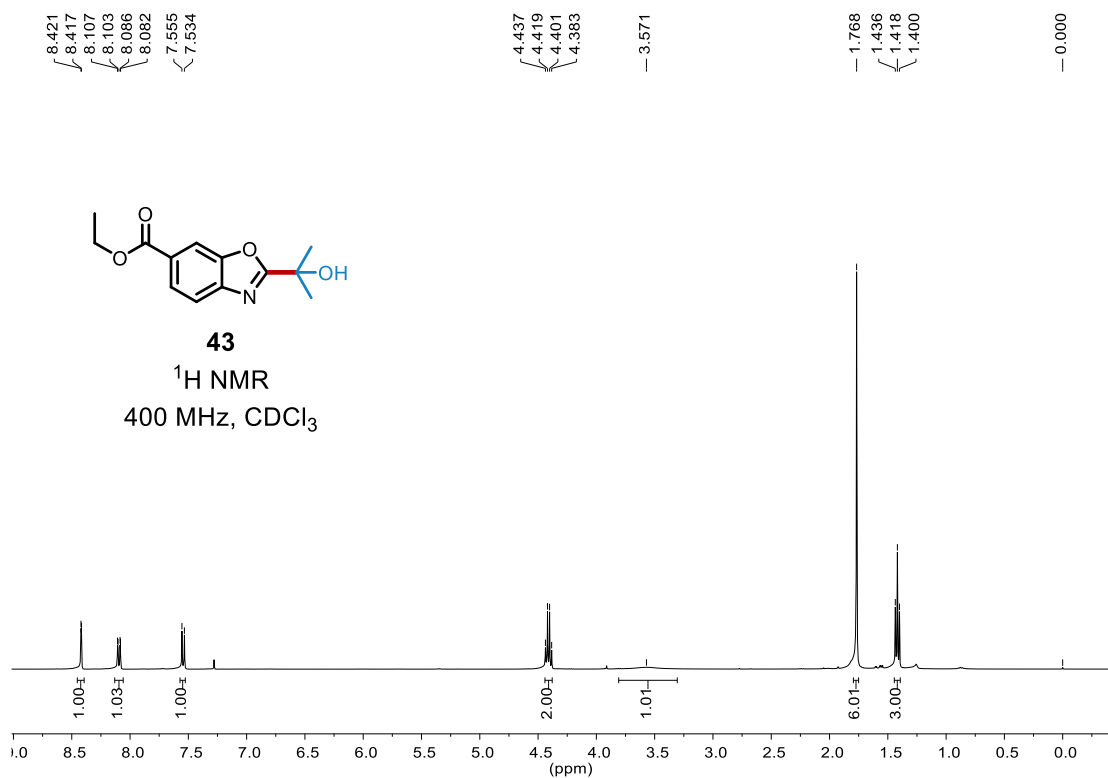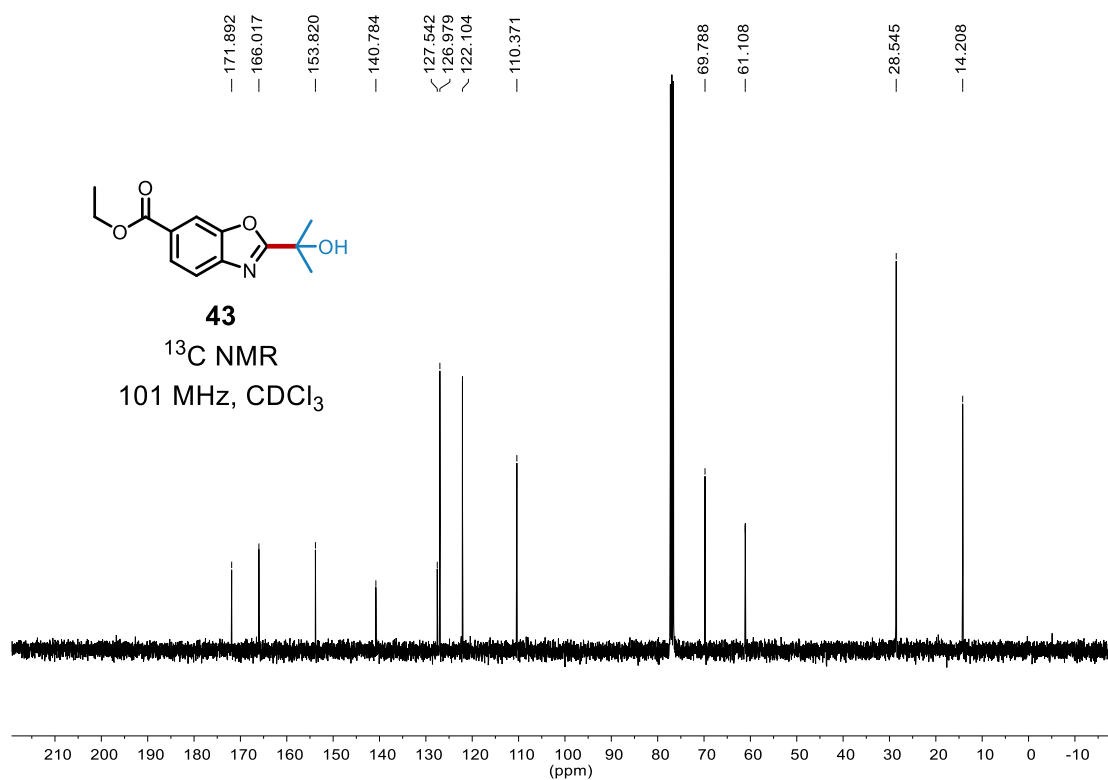

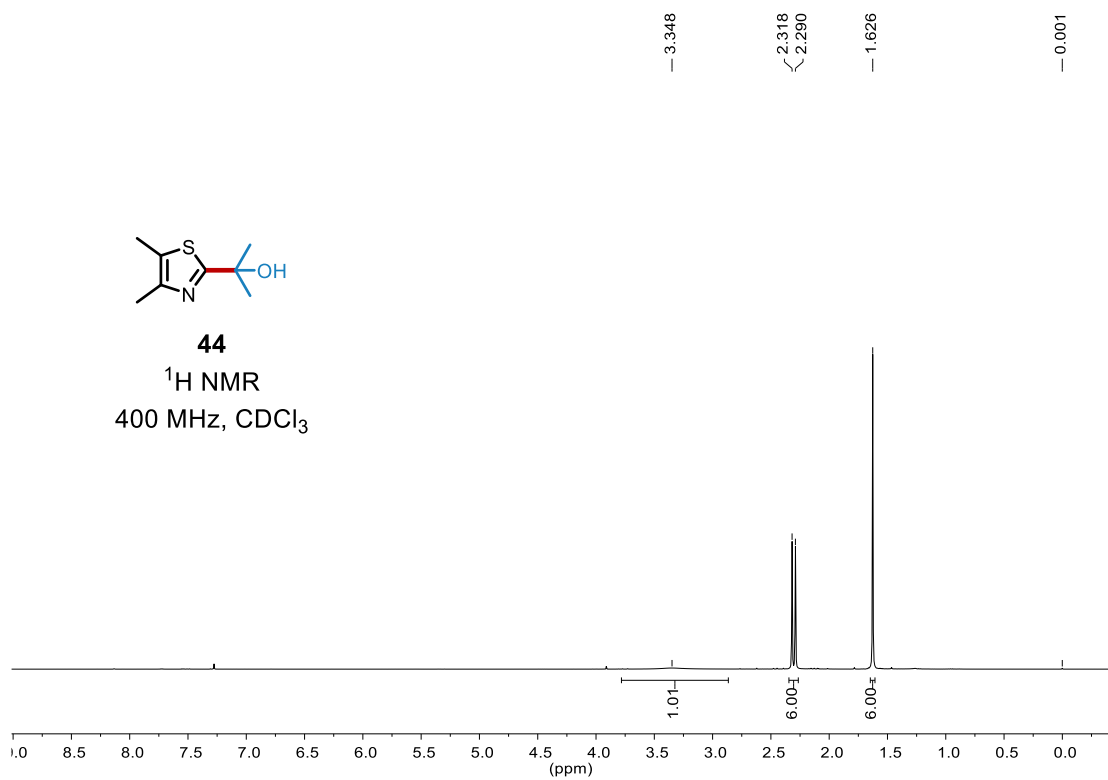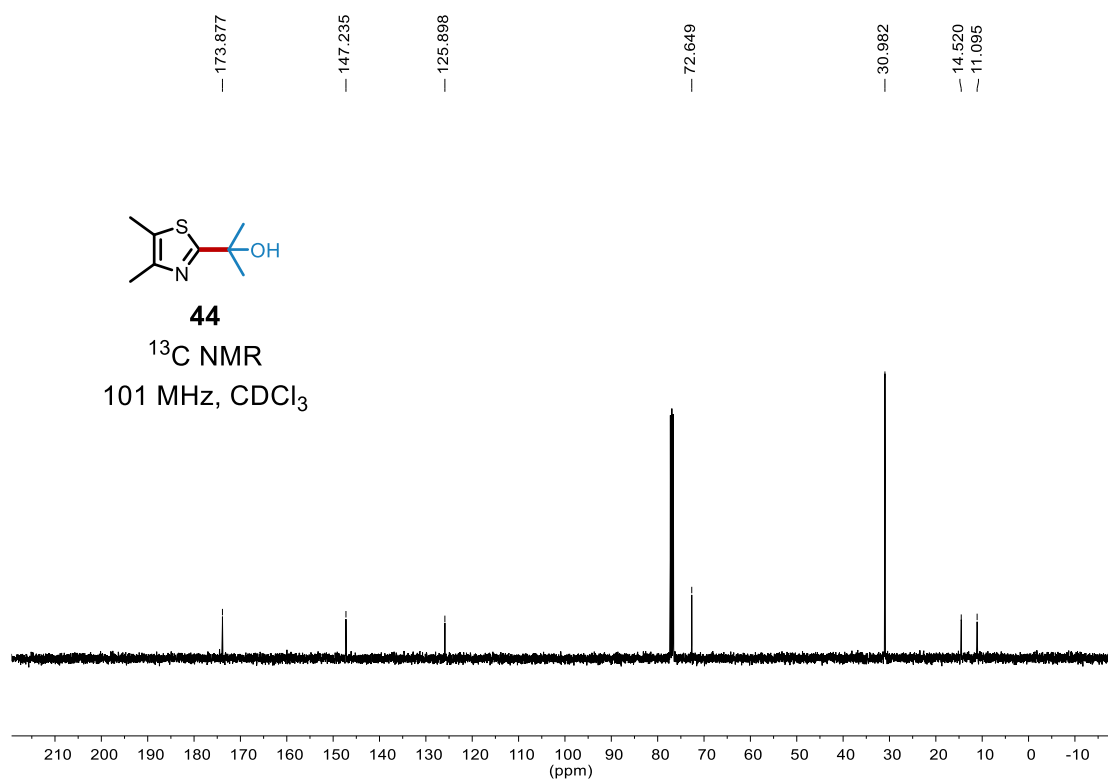



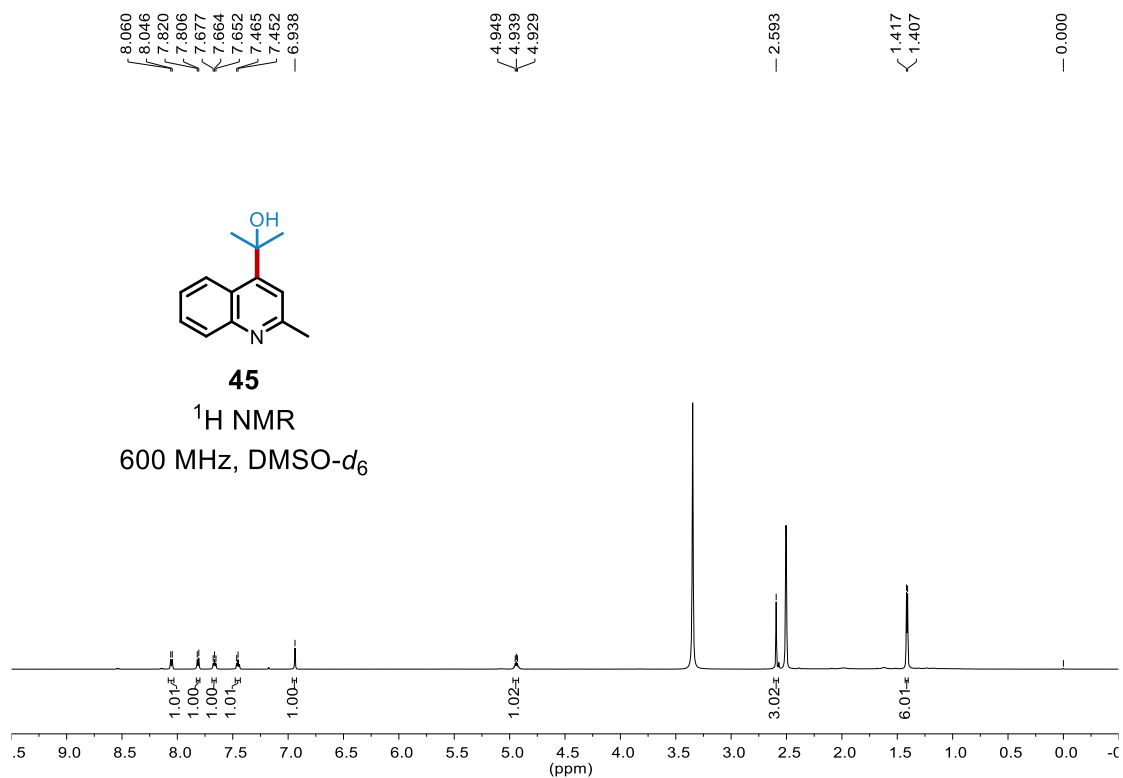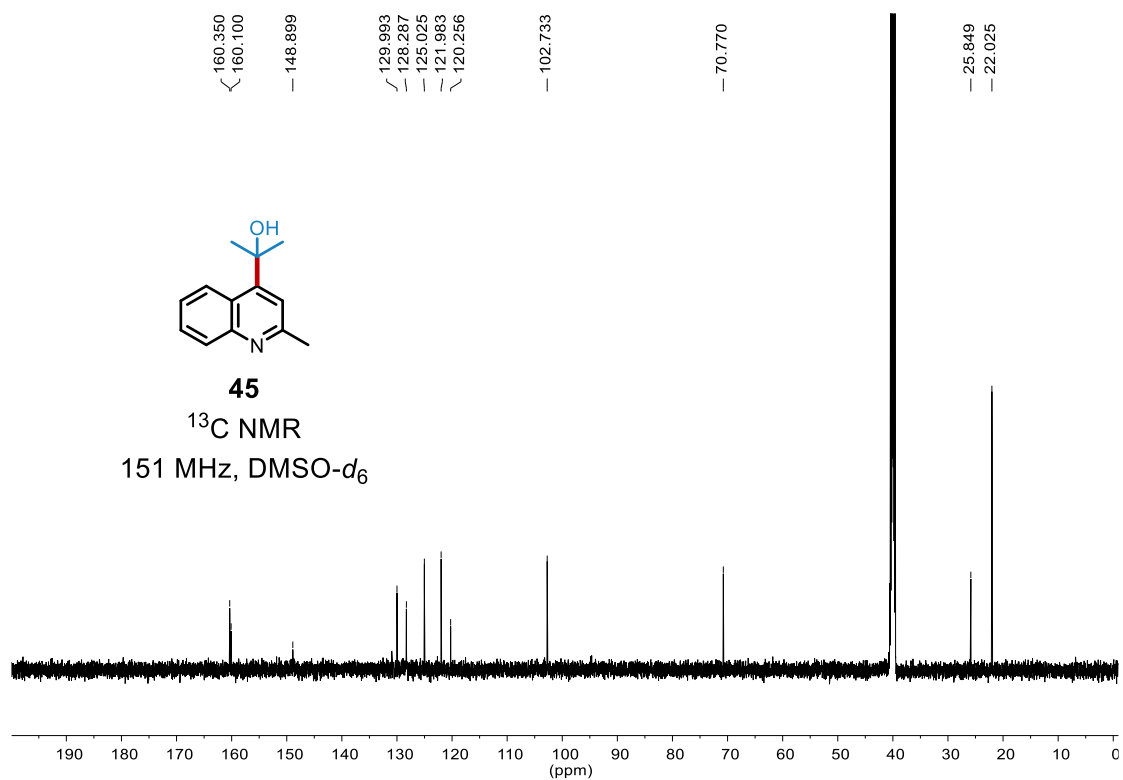

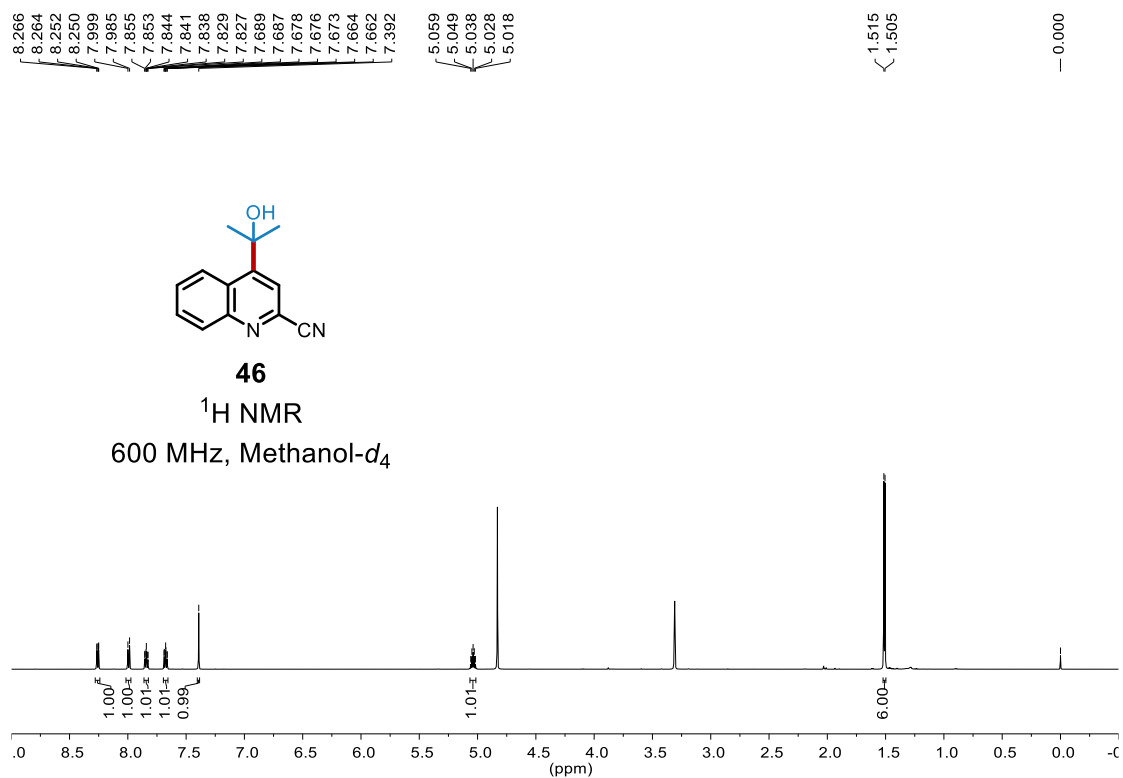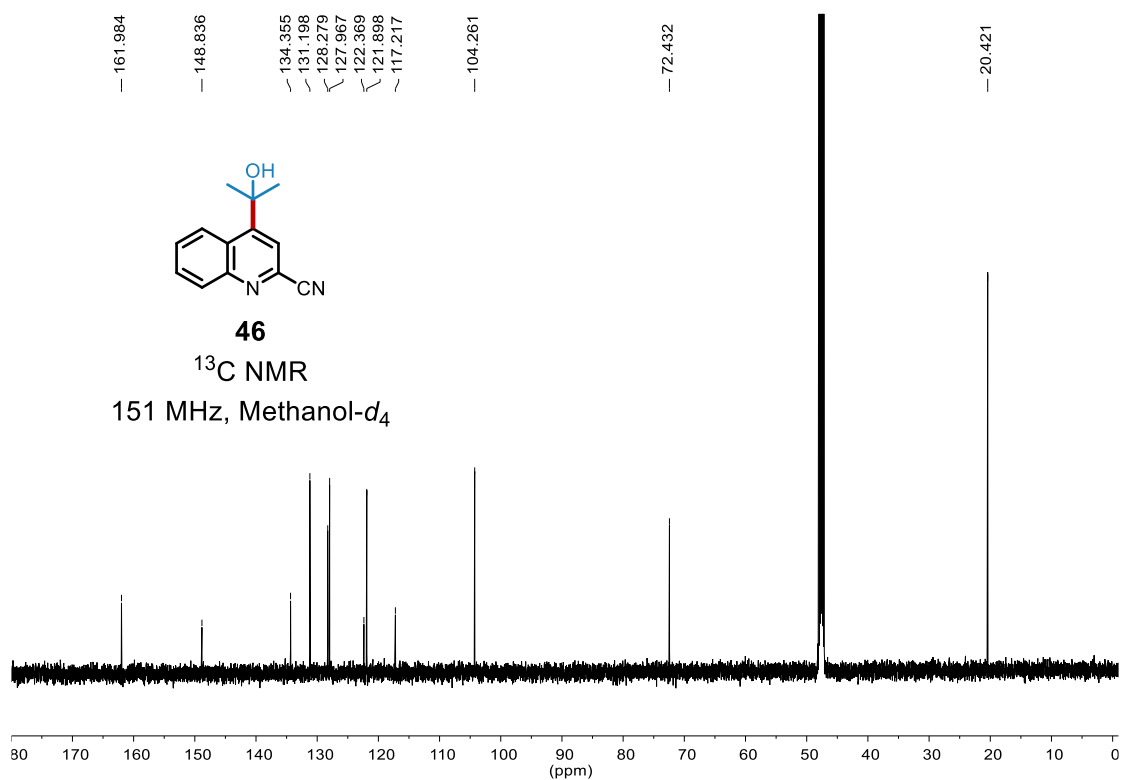

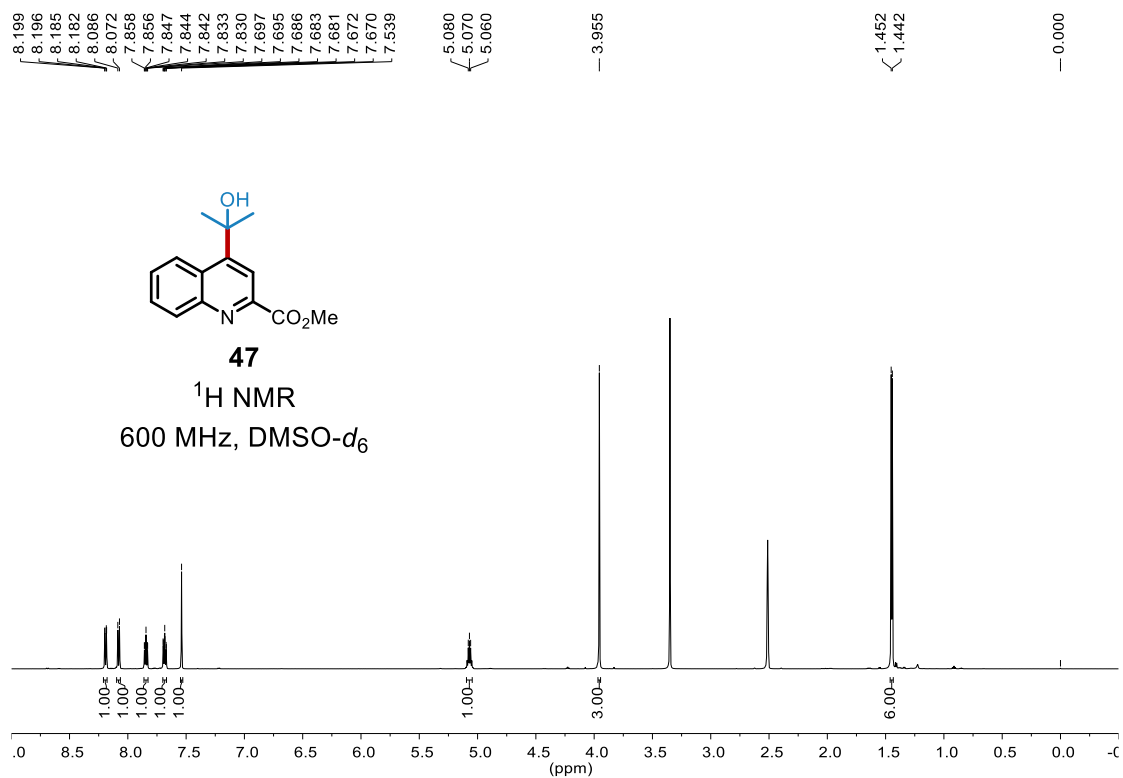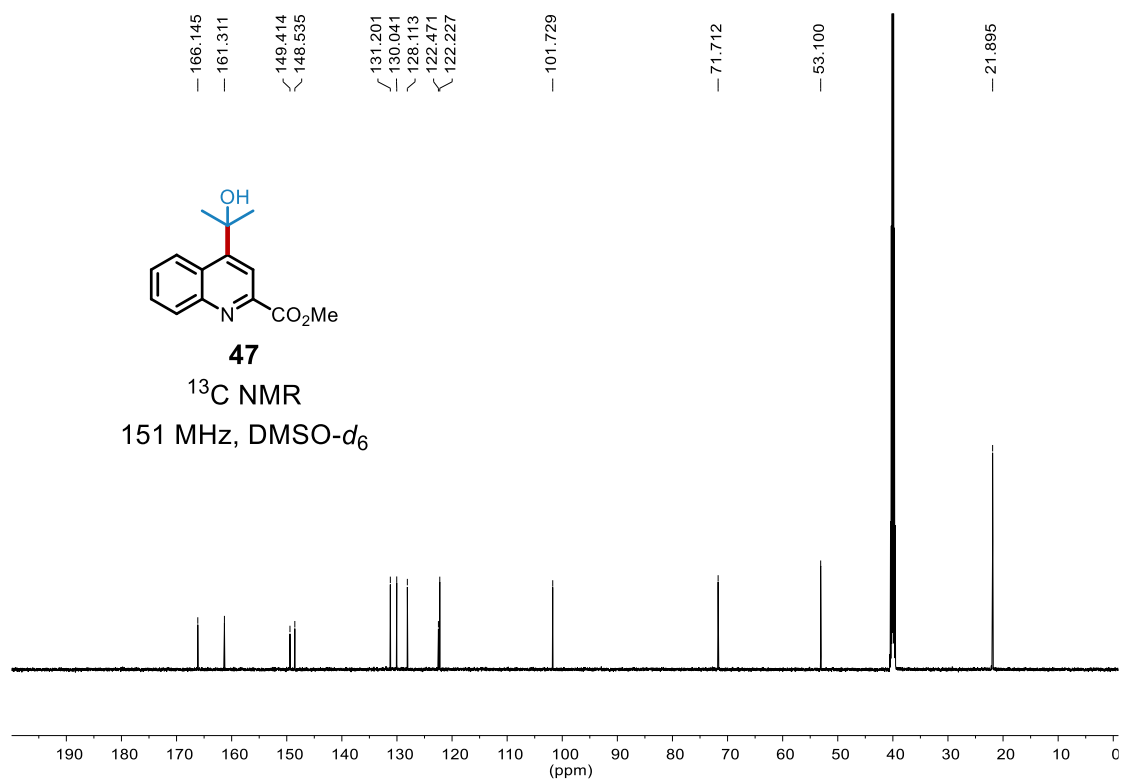

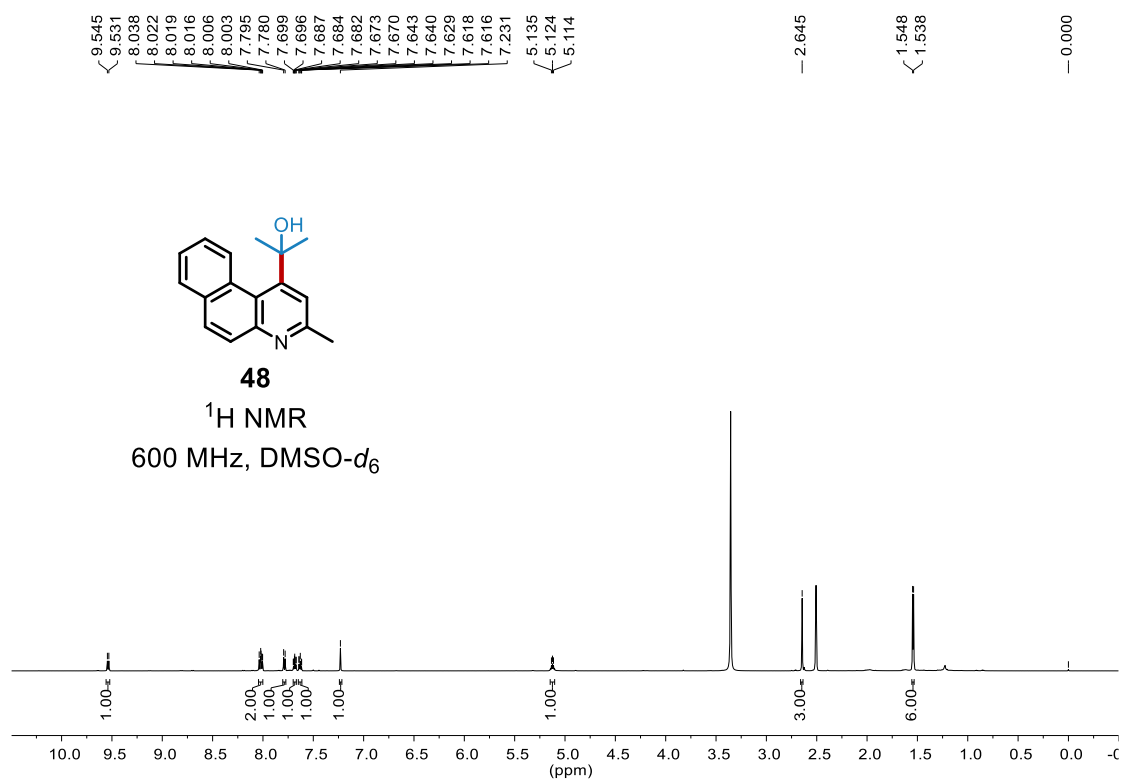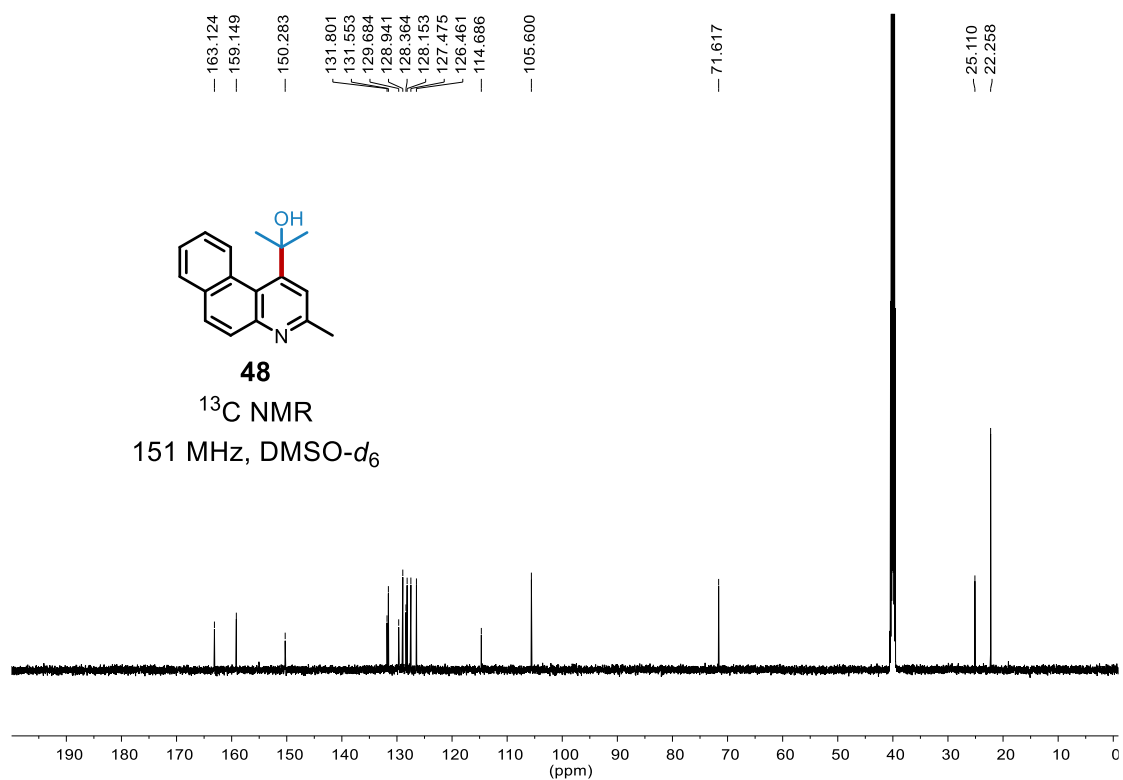

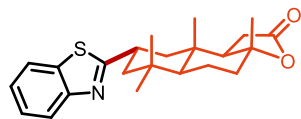

**49**  
<sup>1</sup>H NMR  
 600 MHz, CDCl<sub>3</sub>

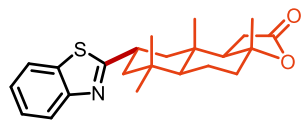

**49**  
<sup>13</sup>C NMR  
151 MHz, CDCl<sub>3</sub>

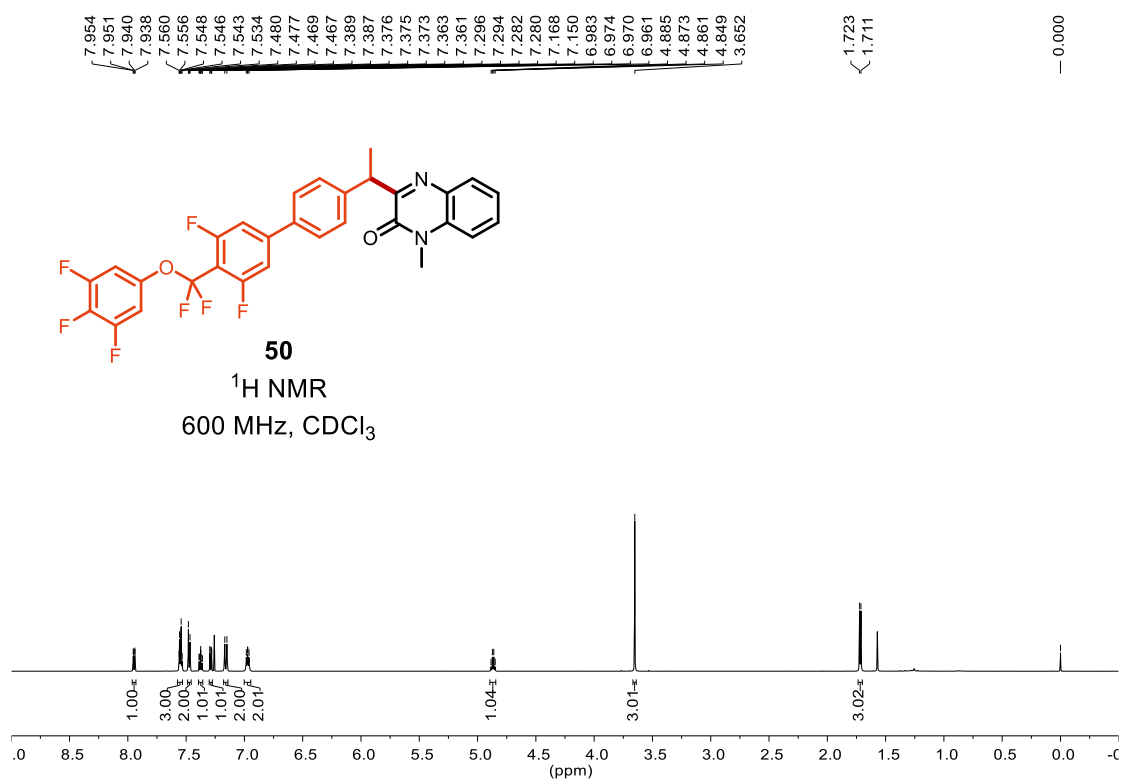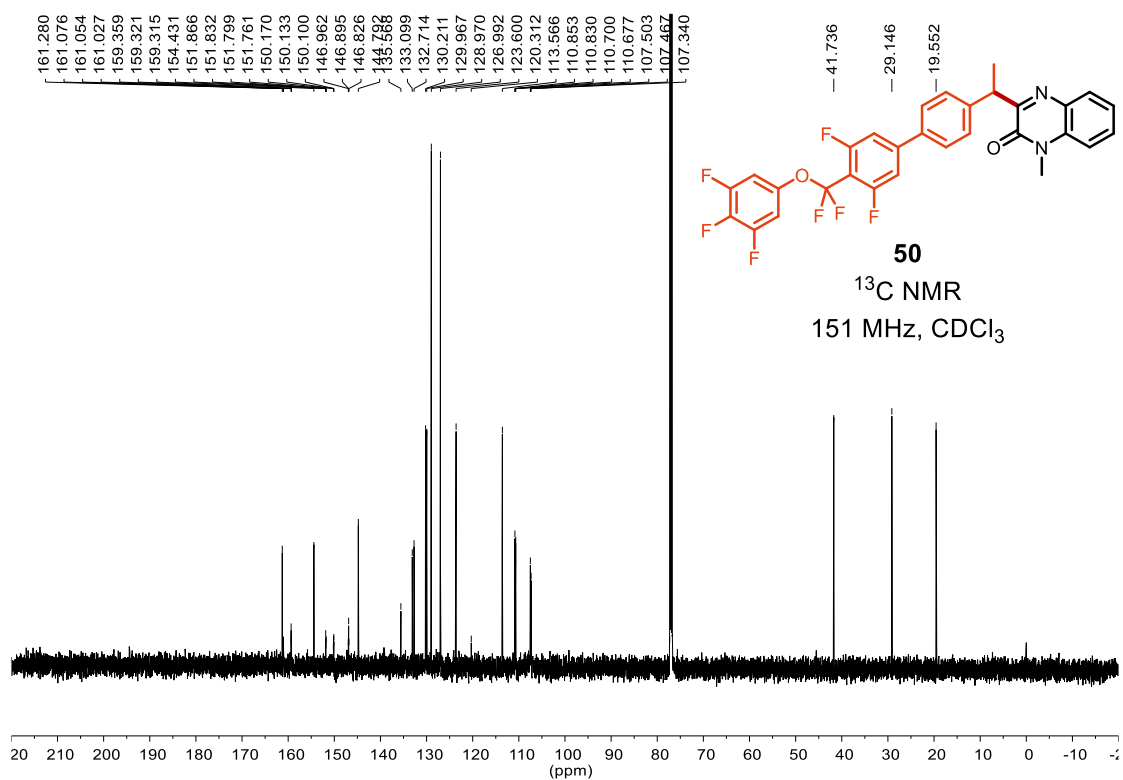

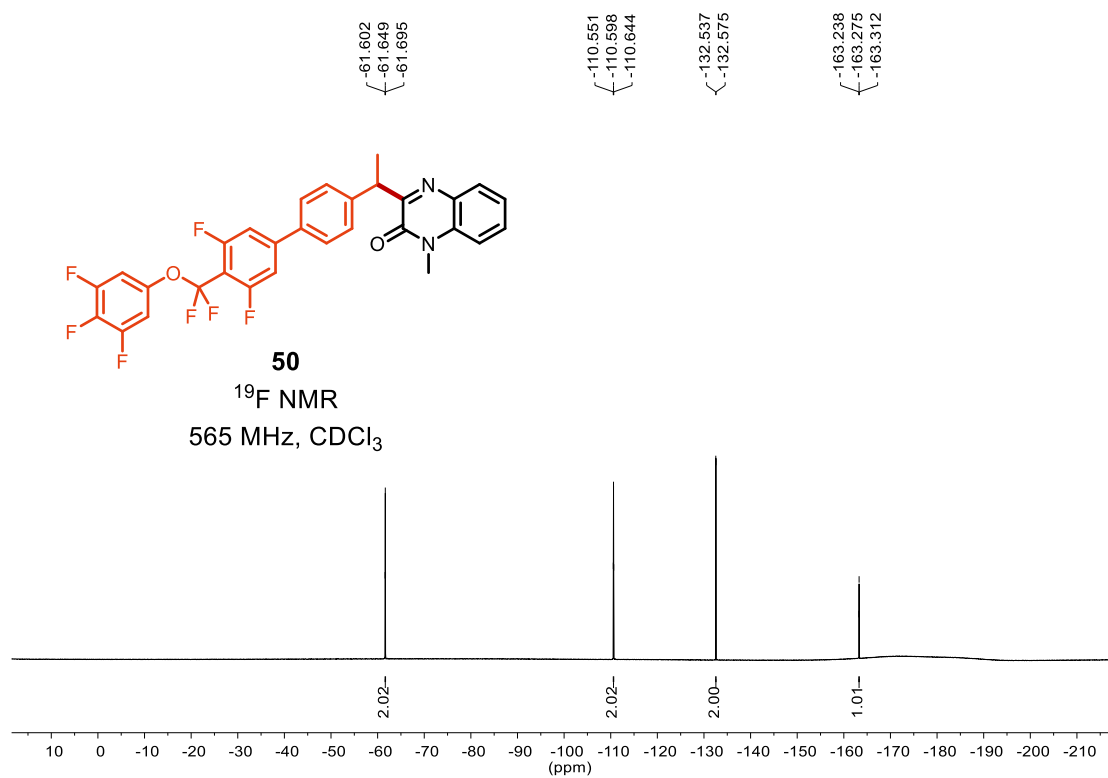

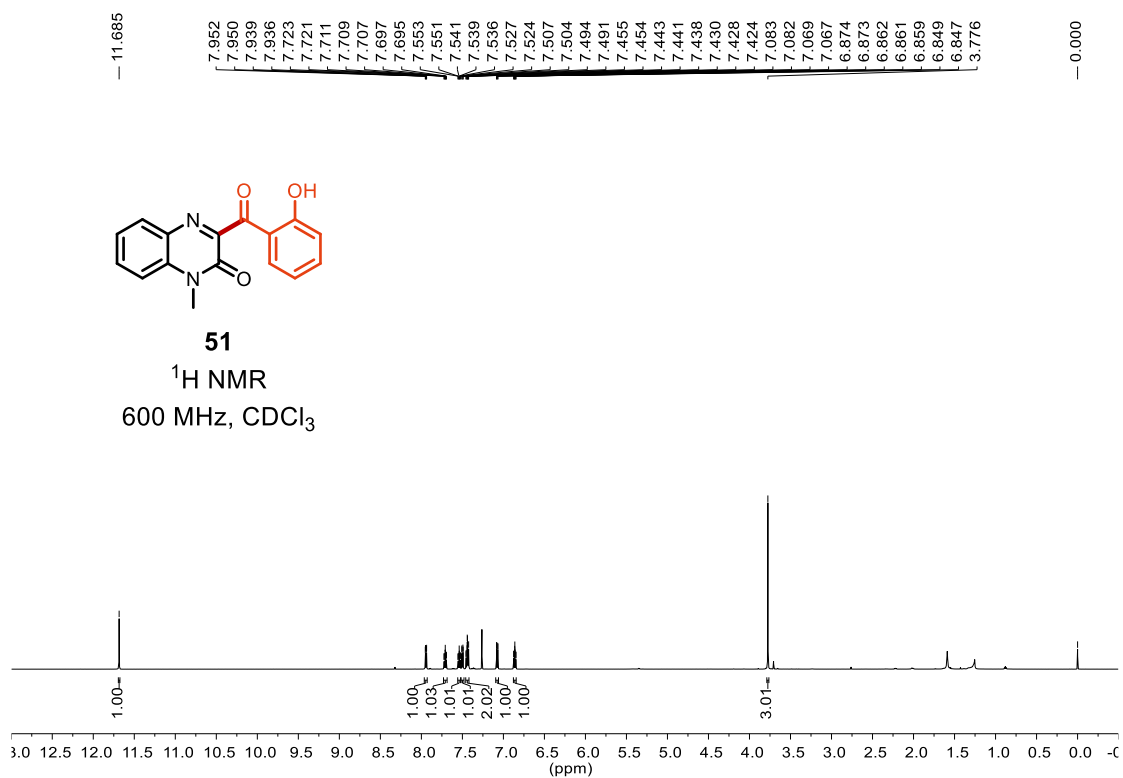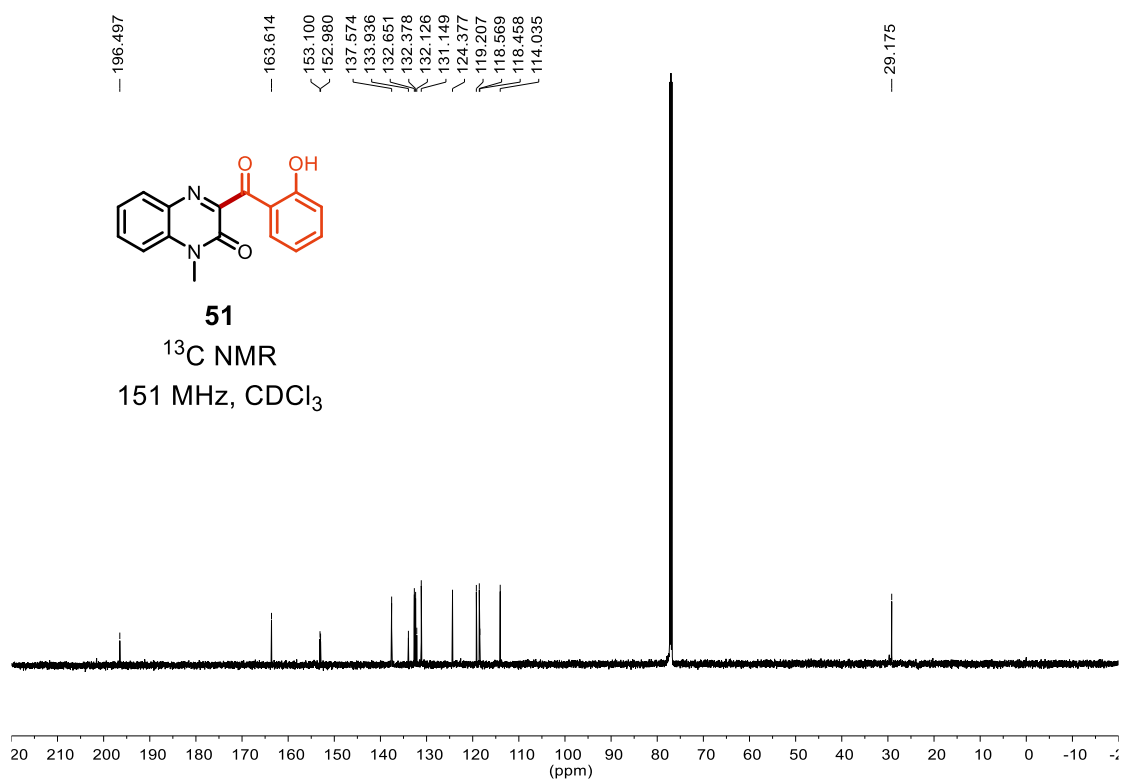



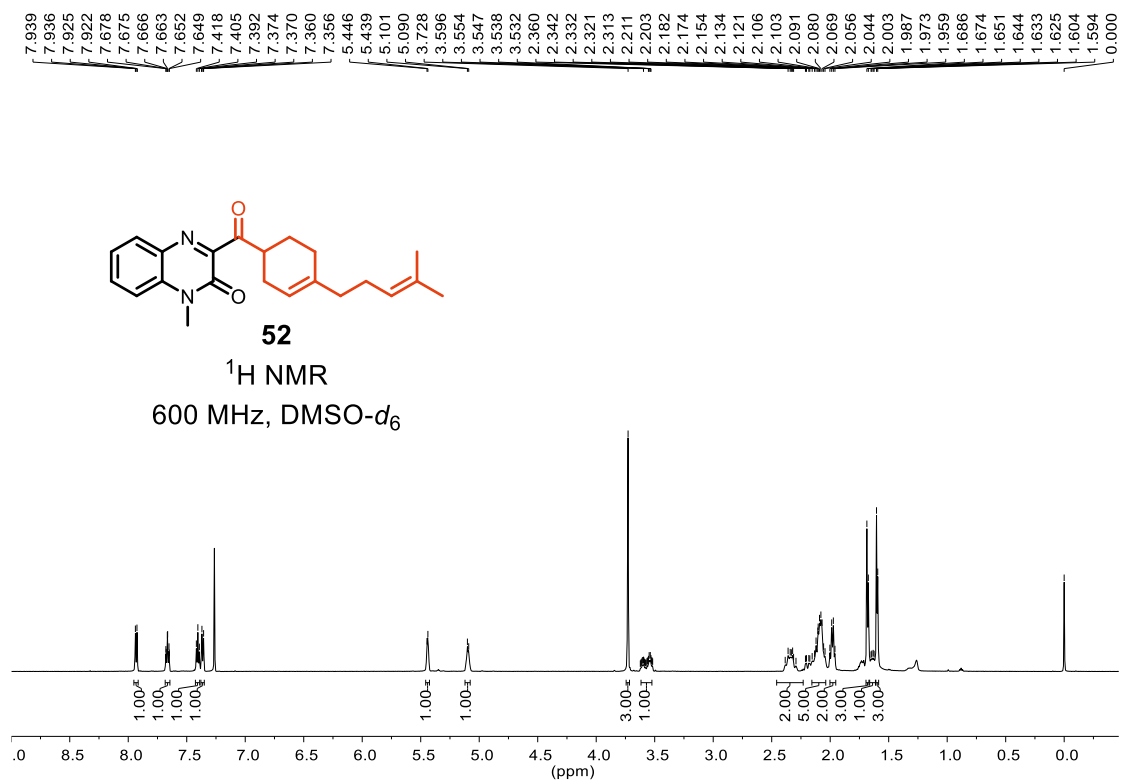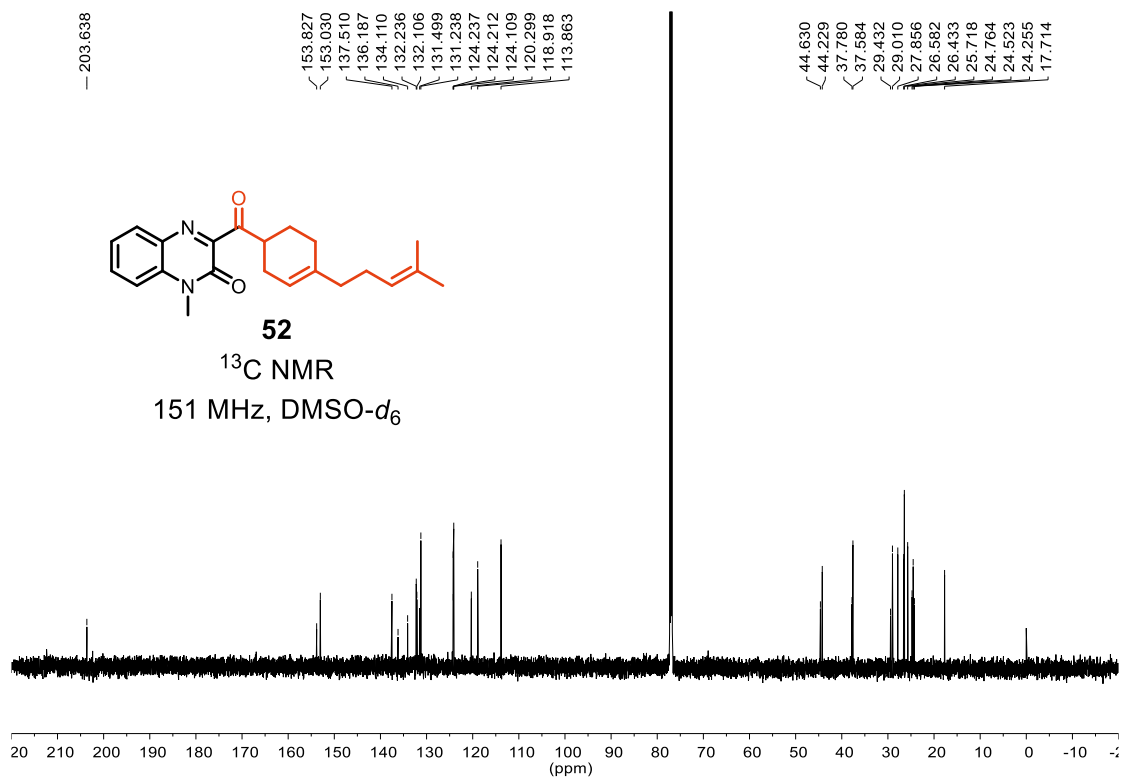

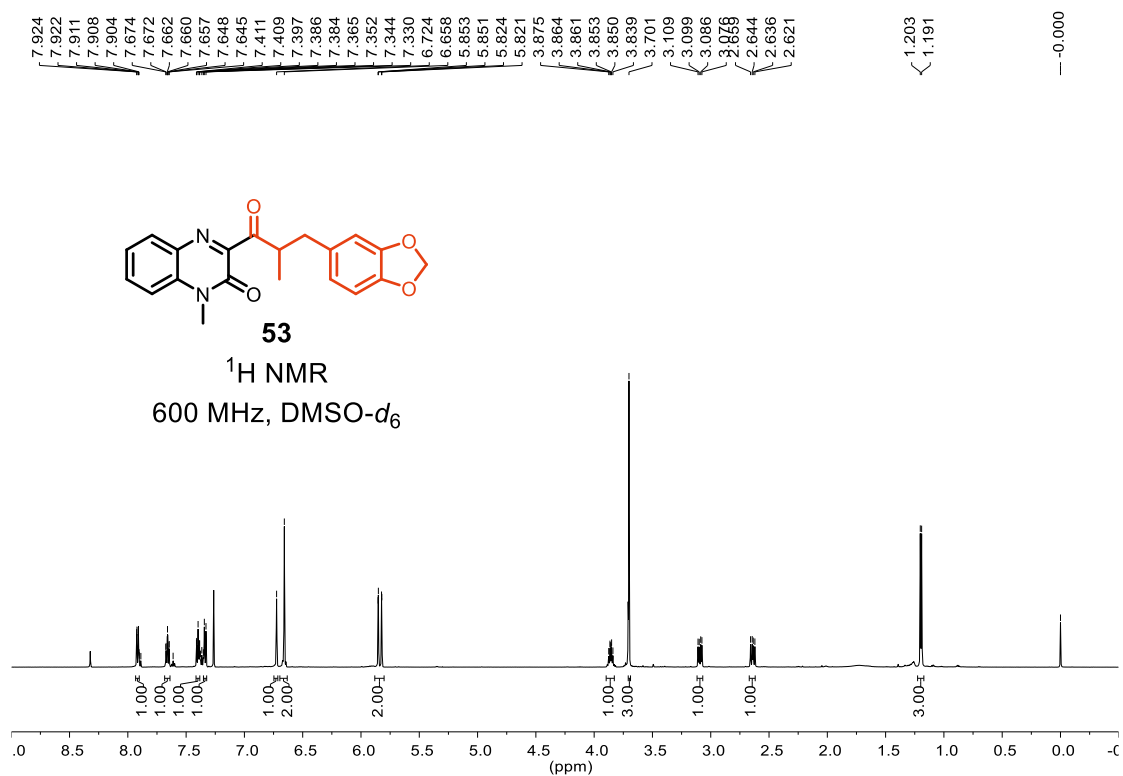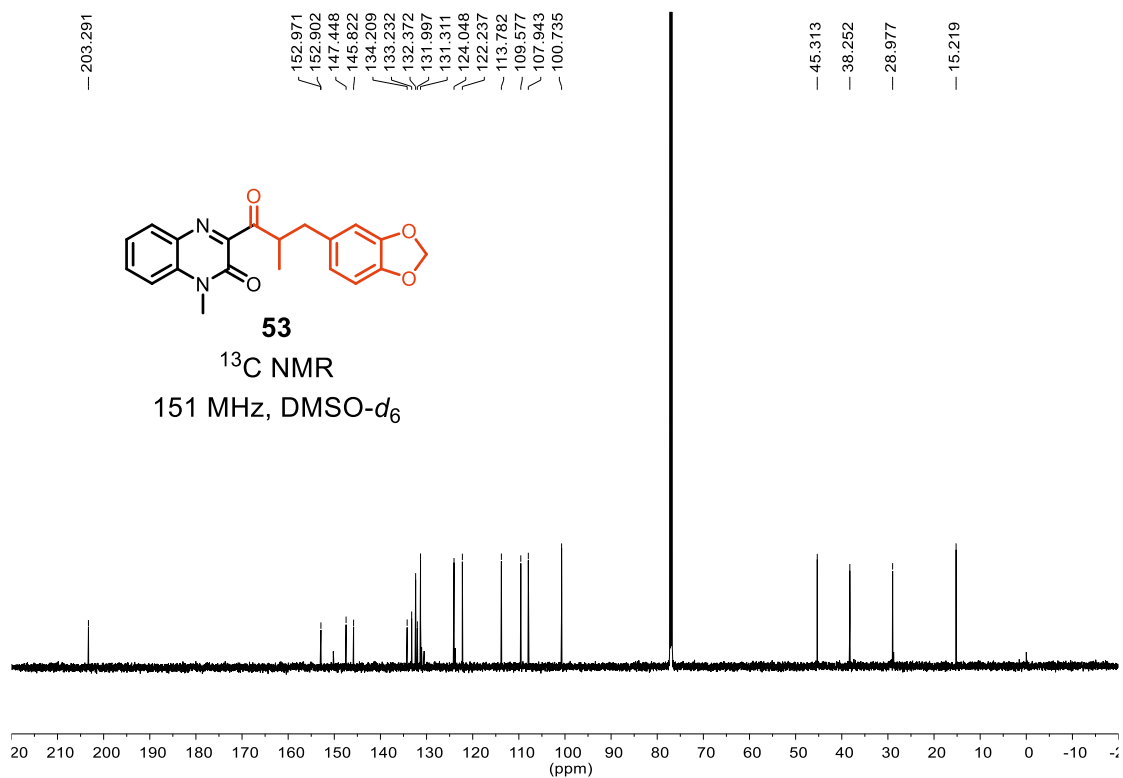

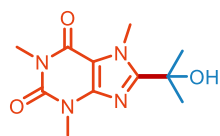

**54**

<sup>1</sup>H NMR  
400 MHz, CDCl<sub>3</sub>

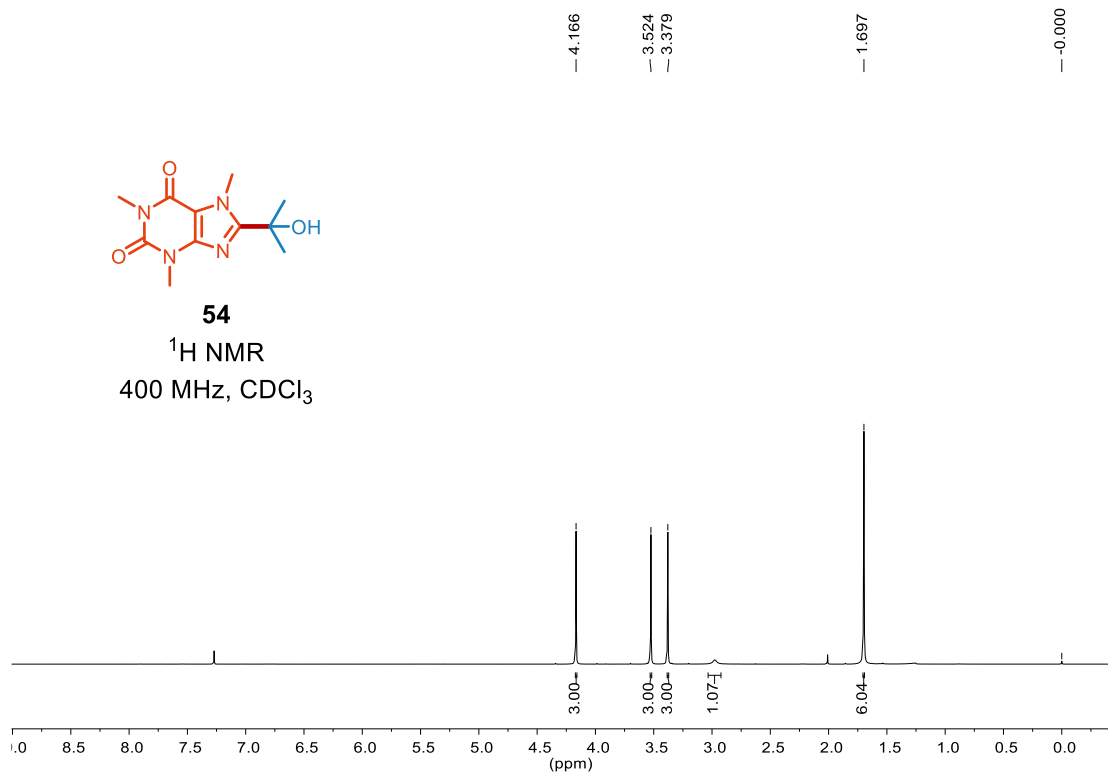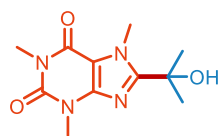

**54**

<sup>13</sup>C NMR  
101 MHz, CDCl<sub>3</sub>

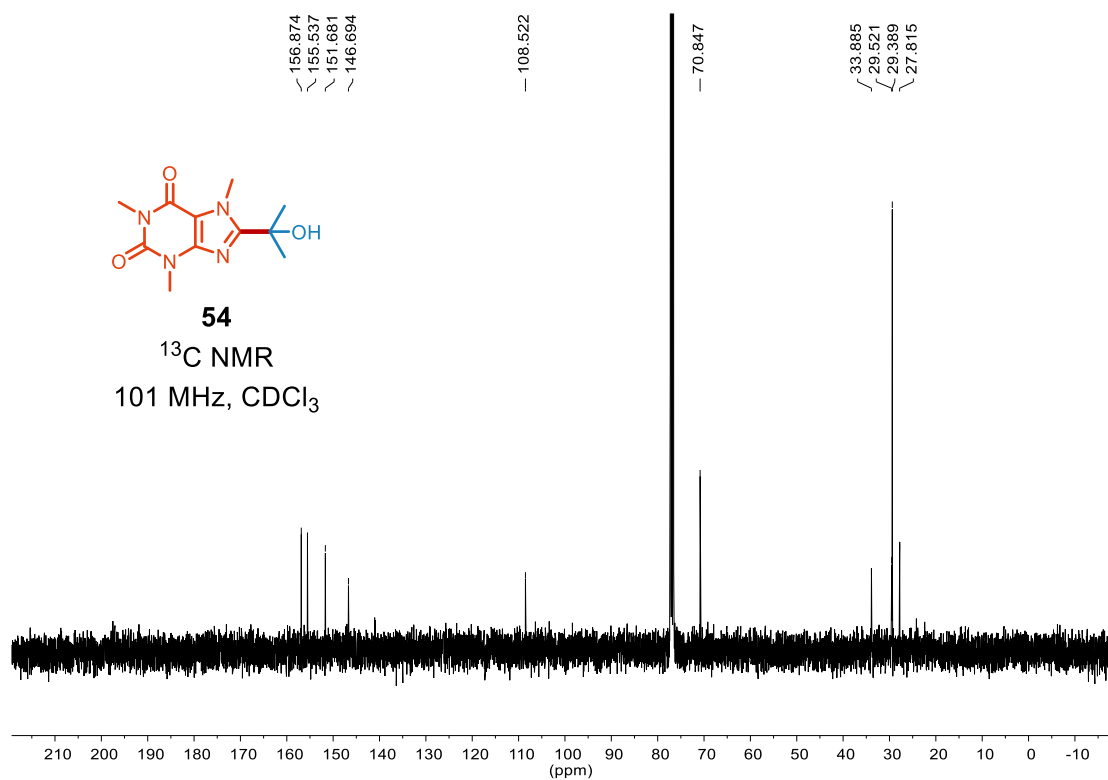

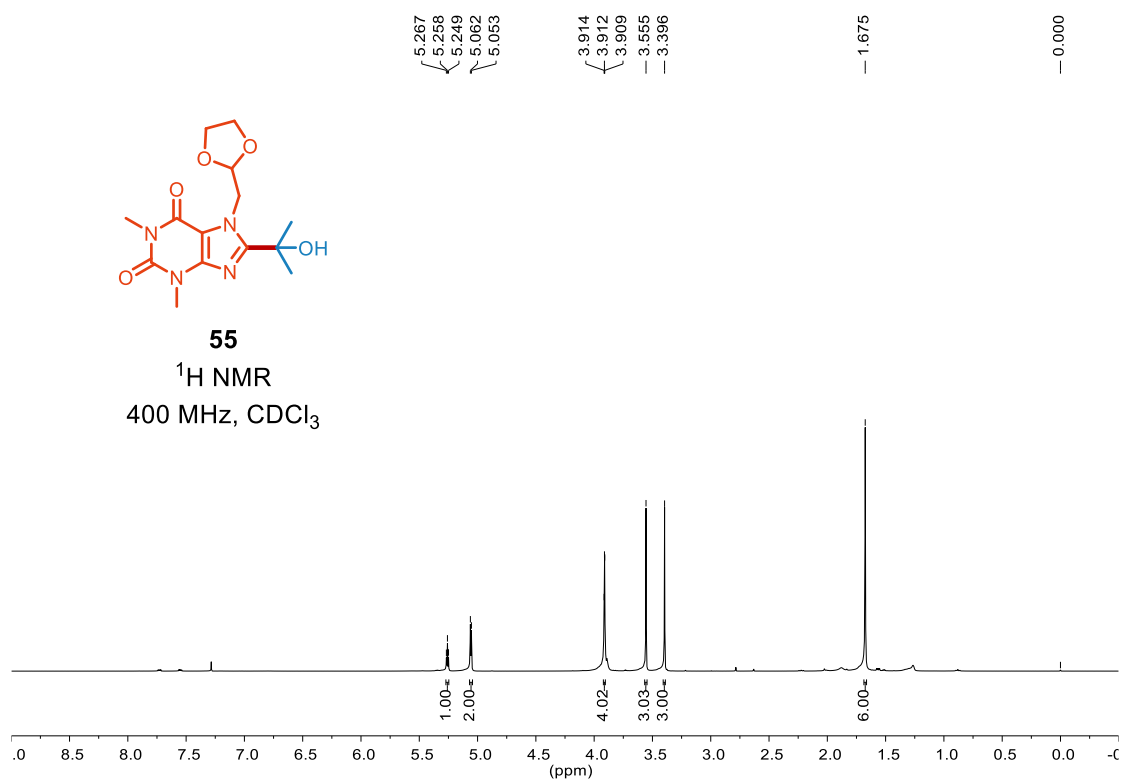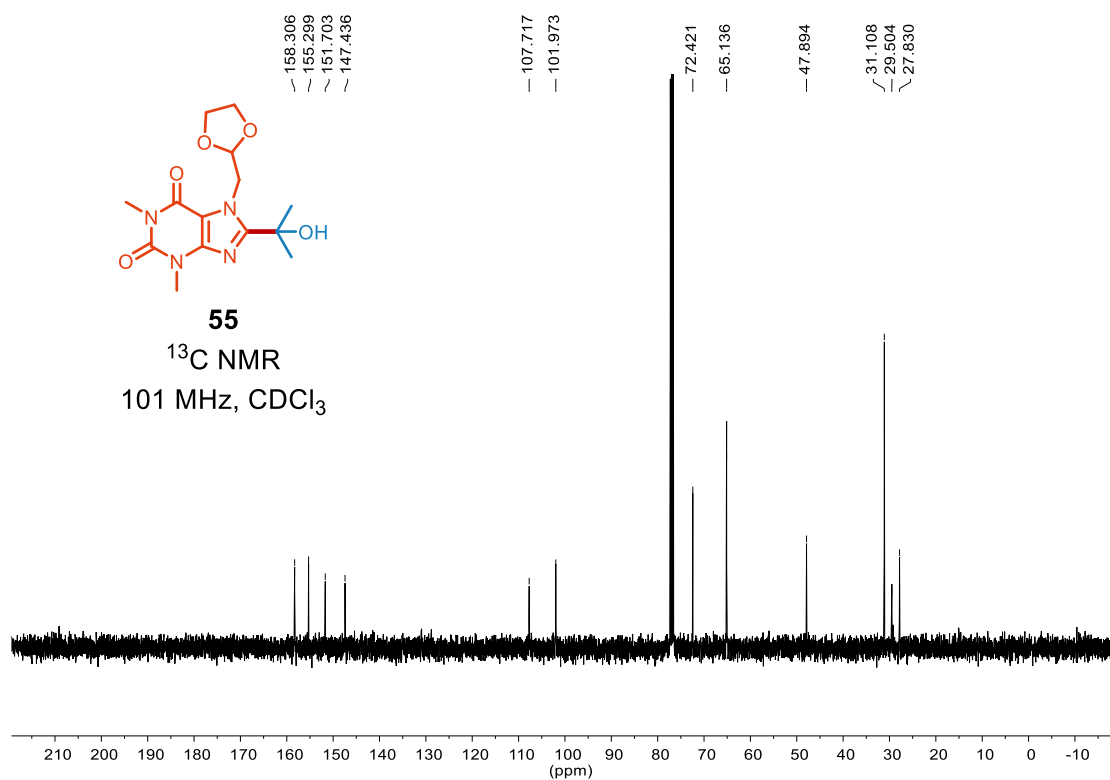

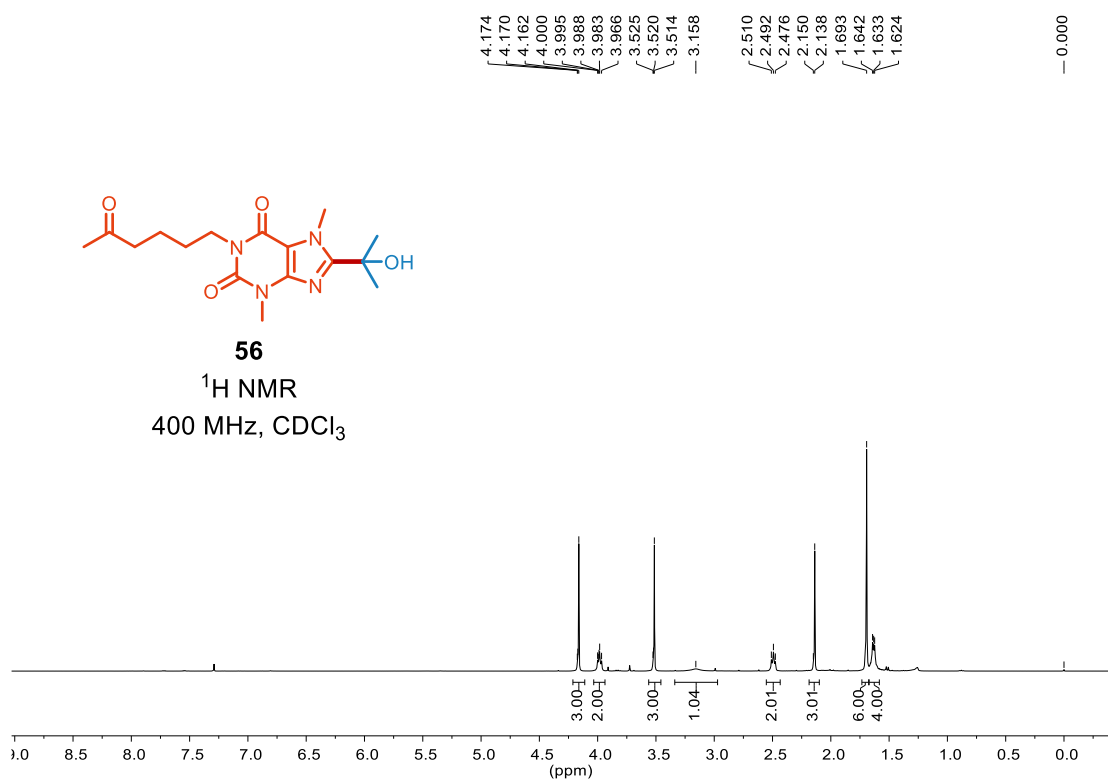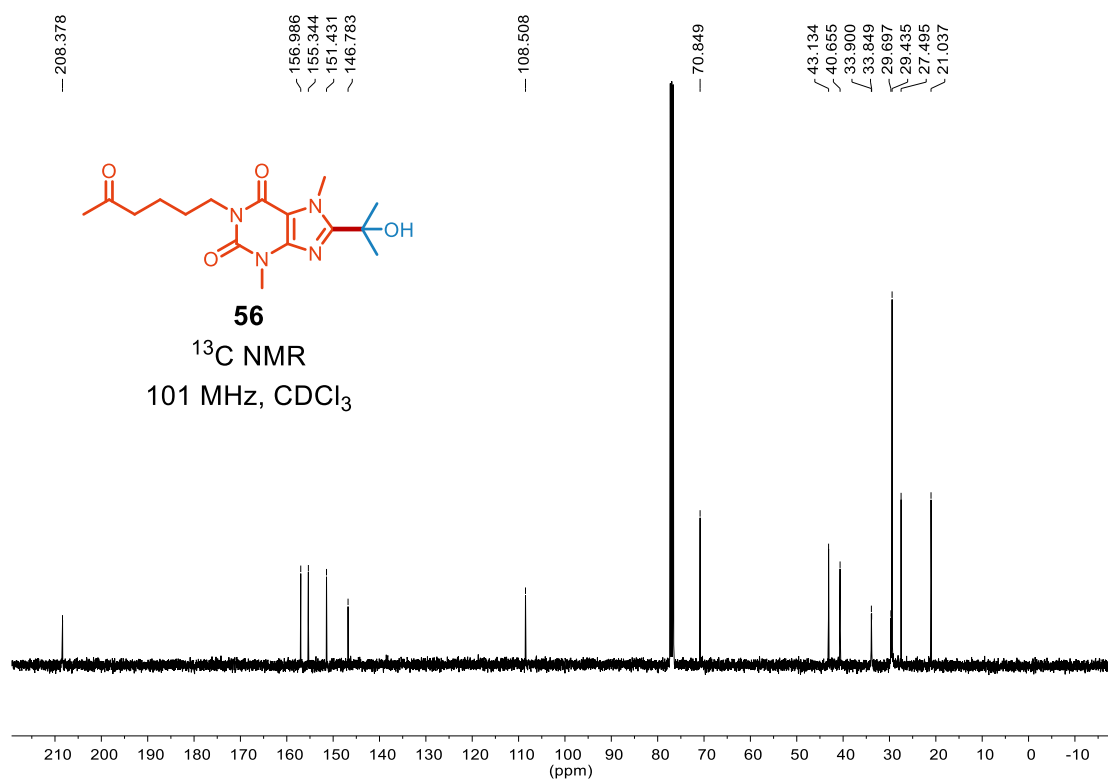

## 8. Reference

1. (a) M. E. Ruos, R. G. Kinney, O. T. Ring and A. G. Doyle, *J. Am. Chem. Soc.*, 2023, **145**, 18487-18496; (b) E. Speckmeier, T. G. Fischer and K. Zeitler, *J. Am. Chem. Soc.*, 2018, **140**, 15353-15365.
2. J. J. A. Garwood, A. D. Chen and D. A. Nagib, *J. Am. Chem. Soc.*, 2024, **146**, 28034-28059.
3. M. Galeotti, M. Salamone and M. Bietti, *Chem. Soc. Rev.*, 2022, **51**, 2171-2223.
4. Y. Quan, G. Lan, Y. Fan, W. Shi, E. You and W. Lin, *J. Am. Chem. Soc.*, 2020, **142**, 1746-1751.
5. X.-Z. Fan, J.-W. Rong, H.-L. Wu, Q. Zhou, H.-P. Deng, J. D. Tan, C.-W. Xue, L.-Z. Wu, H.-R. Tao and J. Wu, *Angew. Chem. Int. Ed.*, 2018, **57**, 8514-8518.
6. J. Xu, L. Liu, Z.-C. Yan, Y. Liu, L. Qin, N. Deng and H.-J. Xu, *Green Chem.*, 2023, **25**, 2268-2273.
7. Z. Xie, Y. Cai, H. Hu, C. Lin, J. Jiang, Z. Chen, L. Wang and Y. Pan, *Org. Lett.*, 2013, **15**, 4600-4603.
8. Y. Zhang, K. B. Teuscher and H. Ji, *Chem. Sci.*, 2016, **7**, 2111-2118.
9. Y. Ikeda, Y. Matsukawa, K. Yonekura and E. Shirakawa, *Eur. J. Org. Chem.*, 2021, **2021**, 794-797.
10. K. Niu, L. Song, Y. Hao, Y. Liu and Q. Wang, *Chem. Commun.*, 2020, **56**, 11673-11676.
11. J. Xu, C. Liang, J. Shen, Q. Chen, W. Li and P. Zhang, *Green Chem.*, 2023, **25**, 1975-1981.
12. K. Niu, P. Zhou, L. Ding, Y. Hao, Y. Liu, H. Song and Q. Wang, *ACS Sustain. Chem. Eng.*, 2021, **9**, 16820-16828.
13. Y. Kong, W. Xu, X. Liu and J. Weng, *Chin. Chem. Lett.*, 2020, **31**, 3245-3249.
14. J. Waser, B. Gaspar, H. Nambu and E. M. Carreira, *J. Am. Chem. Soc.*, 2006, **128**, 11693-11712.
15. J. Zhou, C. Wang, L. Huang, C. Luo, S. Ye, N. Xu, Y. Zhu, L. Liu, Q. Ren, Z. Chen, S. Song and J. Li, *Green Chem.*, 2022, **24**, 4606-4613.
16. P. Ghosh, N. Y. Kwon, Y. Byun, N. K. Mishra, J. S. Park and I. S. Kim, *ACS Catal.*, 2022, **12**, 15707-15714.
17. S. Cao, J.-X. Chen, X.-L. Zhang, X. Song, W.-Y. Song, Y.-S. Wu, Y.-H. Zhang and Z. Liu, *Org. Lett.*, 2024, **26**, 5833-5838.
18. S. Singh, N. Dagar and S. R. Roy, *Chem. Commun.*, 2022, **58**, 3831-3834.
19. X.-K. He, J. Lu, A.-J. Zhang, Q.-Q. Zhang, G.-Y. Xu and J. Xuan, *Org. Lett.*, 2020, **22**, 5984-5989.
20. L.-Y. Xie, S. Peng, T.-G. Fan, Y.-F. Liu, M. Sun, L.-L. Jiang, X.-X. Wang, Z. Cao and W.-M. He, *Sci. China Chem.*, 2019, **62**, 460-464.
21. Z. Zhang, F. Cheng, X. Ma, K. Sun, X. Huang, J. An, M. Peng, X. Chen and B. Yu, *Green Chem.*, 2024, **26**, 7331-7336.
22. K. Aoki, K. Yonekura, Y. Ikeda, R. Ueno and E. Shirakawa, *Adv. Synth. Catal.*, 2020, **362**, 2200-2204.
23. A. S. Miller and E. J. Alexanian, *Chem. Sci.*, 2022, **13**, 11878-11882.
24. J. Salomon and D. Elad, *J. Org. Chem.*, 1973, **38**, 3420-3421.
